# Supplementary material for: Transcriptome Analysis of Ullrich Congenital Muscular Dystrophy Fibroblasts Reveals a Disease Extracellular Matrix Signature and Key Molecular Regulators
Source: PLoS One. 2015 Dec 15;10(12):e0145107. doi: 10.1371/journal.pone.0145107 (PMC4686057; doi:10.1371/journal.pone.0145107)
Supplement: S1 Table — (XLSX) [file pone.0145107.s001.xlsx]

## Sheet: P-C
Suppl. Table 1. List of unique genes for each main comparison.
Gene symbol	AffyID	FC	FDR
DACT1	11735385_s_at	-6.30517	0
SCRG1	11757502_x_at	-5.88235	0
ID4	11721688_at	-4.31034	0
COL11A1	11725765_a_at	-4.00641	0
GPC4	11727403_at	-3.93856	0
RDH10	11719627_at	-3.57526	0
TPD52L1	11720704_s_at	-3.57398	0
GDF6	11734363_at	-3.46861	0
INHBE	11736262_at	-3.29598	0
SLC38A4	11725512_a_at	-3.14961	0
MYH2	11752274_a_at	-2.97708	0.0003
CXCR7	11752501_a_at	-2.97177	0
IL8	11718841_s_at	-2.95072	0.002
TNFAIP6	11743636_at	-2.93772	0
SEL1L3	11753915_a_at	-2.72331	0.0006
SOX9	11758216_s_at	-2.71444	0
NFIB	11717219_s_at	-2.70343	0.0003
PPAPDC1A	11728520_a_at	-2.6476	0.0016
ATF5	11717800_a_at	-2.64271	0.0005
ABCA8	11721557_a_at	-2.61438	0.0003
RPS4Y1	11716411_x_at	-2.60281	0.0076
DDX3Y	11724075_a_at	-2.60213	0.0027
SORBS2	11735570_a_at	-2.57202	0.0003
C11orf96	11719899_at	-2.54065	0.0004
CTH	11742278_a_at	-2.5208	0.0006
BCAT1	11749782_x_at	-2.48756	0.0012
TGM2	11718399_s_at	-2.48385	0.002
CRISPLD2	11723030_at	-2.43962	0.0008
PTGS2	11724037_at	-2.41371	0.0016
IL6	11746463_a_at	-2.36518	0.0032
ACTG2	11748016_a_at	-2.35738	0.002
LGR4	11743626_s_at	-2.33809	0.0012
TRIB3	11719811_a_at	-2.26809	0.0028
TRIL	11726903_at	-2.26501	0.0072
PSAT1	11751230_a_at	-2.2553	0.0111
CXCL2	11744127_at	-2.24517	0.0032
KCNE4	11730357_at	-2.23614	0.0019
CTGF	11715440_a_at	-2.23464	0.0031
SYBU	11721430_a_at	-2.23414	0.0027
ODZ3	11727984_at	-2.23164	0.0051
SULF2	11740238_a_at	-2.22025	0.0177
C3	11715393_a_at	-2.21631	0.0051
GLS	11743151_a_at	-2.21582	0.002
DAB1	11759050_at	-2.20848	0.0015
MGP	11716203_a_at	-2.18914	0.005
DEPDC6	11724762_a_at	-2.17344	0.0032
CXCL1	11719366_s_at	-2.17202	0.0031
ASPN	11758636_s_at	-2.16591	0.0067
PAWR	11731569_at	-2.15983	0.0045
MT1G	11717386_s_at	-2.151	0.0075
ELN	11754442_x_at	-2.14869	0.0074
TSPAN2	11728388_at	-2.14731	0.0049
LCTL	11742082_a_at	-2.1322	0.0045
HAPLN1	11725375_at	-2.11327	0.0095
ASNS	11716364_s_at	-2.11327	0.01
KCTD15	11758536_s_at	-2.09952	0.0306
GATA6	11723838_at	-2.09468	0.0071
DNAJC12	11715165_at	-2.09205	0.0019
DHRS3	11716835_a_at	-2.08594	0.0019
STAT4	11733215_a_at	-2.07168	0.0063
SGCG	11731114_a_at	-2.06526	0.0049
TNC	11752009_a_at	-2.06228	0.0049
DDIT4	11743972_a_at	-2.05002	0.0076
FZD4	11719012_at	-2.04876	0.0024
C1QTNF3	11734565_s_at	-2.04876	0.0053
BCL11B	11733620_a_at	-2.04708	0.0067
OGN	11736191_s_at	-2.04165	0.0072
VLDLR	11721181_a_at	-2.03791	0.0113
SYNPO2	11721602_a_at	-2.02675	0.0076
MFAP3L	11726527_s_at	-2.02102	0.0063
KCNJ8	11725806_at	-2.00521	0.0031
NFKBIZ	11757513_at	-2.00401	0.0094
ARHGAP28	11723981_s_at	-1.99124	0.0278
C5orf13	11741504_a_at	-1.98926	0.0087
GCH1	11721734_s_at	-1.98689	0.0071
HOXD10	11730130_at	-1.98413	0.0285
ENPEP	11758509_s_at	-1.96889	0.0129
KCNE3	11720713_a_at	-1.96696	0.0164
RARRES2	11754862_a_at	-1.96425	0.005
IGF2BP1	11727103_at	-1.96155	0.0052
INHBA	11746931_a_at	-1.9581	0.0087
HOXD11	11740359_a_at	-1.95122	0.0303
COL1A1	11715351_at	-1.93911	0.0119
PRICKLE1	11727151_a_at	-1.93424	0.0139
FOXF1	11729385_at	-1.93386	0.0113
LXN	11717465_s_at	-1.92715	0.0216
MN1	11725173_at	-1.92419	0.0064
B3GALT2	11729250_at	-1.92308	0.0194
MOCOS	11727675_at	-1.92271	0.0049
NUAK1	11739973_s_at	-1.91534	0.0102
GPCPD1	11718503_a_at	-1.90913	0.0064
EGR2	11722728_a_at	-1.90367	0.0062
EGFL6	11716532_a_at	-1.89538	0.0067
GXYLT2	11731126_at	-1.89502	0.0133
CNN1	11734311_s_at	-1.8943	0.0118
ADRA2A	11722112_at	-1.89107	0.013
LIMCH1	11750804_a_at	-1.88822	0.0138
B3GALTL	11728908_at	-1.88644	0.0062
LHX8	11758388_s_at	-1.88608	0.0072
LRRC15	11723164_a_at	-1.88537	0.0138
KIF26B	11755841_a_at	-1.88537	0.028
FNDC1	11723174_a_at	-1.87582	0.0155
DPT	11744168_at	-1.87336	0.0101
PCK2	11719089_a_at	-1.87301	0.0276
EFEMP1	11749564_a_at	-1.85943	0.0133
FGD6	11723186_at	-1.8577	0.0063
PEAR1	11732925_s_at	-1.85254	0.002
TBX5	11732528_s_at	-1.85014	0.0154
GNB4	11723103_x_at	-1.84706	0.0032
FMN1	11759343_x_at	-1.8423	0.0063
ANGPTL1	11744707_a_at	-1.84196	0.0053
ARRDC4	11719761_at	-1.84162	0.0163
PTER	11736666_a_at	-1.83857	0.0076
CDH11	11753109_a_at	-1.83756	0.0143
KCND2	11736529_at	-1.83688	0.0064
MTHFD2	11744003_x_at	-1.83621	0.0176
BCL11A	11732339_at	-1.8315	0.0112
EIF1AY	11720807_x_at	-1.8305	0.0374
F3	11721291_a_at	-1.82282	0.0214
CXCL6	11730801_at	-1.82249	0.0087
MAMLD1	11755364_a_at	-1.81884	0.0118
CSRP2	11729239_x_at	-1.81455	0.0353
GPAM	11721706_at	-1.81028	0.0088
FOXP1	11732279_at	-1.80766	0.0111
AGT	11730726_s_at	-1.80538	0.0218
PPP1R3C	11749593_a_at	-1.80375	0.0156
WISP1	11731822_at	-1.78923	0.0215
PHF17	11725072_at	-1.78795	0.0113
ADAM19	11723188_s_at	-1.78094	0.0166
EDIL3	11764077_s_at	-1.78063	0.0139
COL10A1	11735218_at	-1.77462	0.0157
IQCA1	11729908_a_at	-1.77054	0.0156
NHSL1	11755756_a_at	-1.76056	0.0157
KRT7	11715683_a_at	-1.75901	0.0165
SIX1	11758110_s_at	-1.75593	0.0181
ACVR2A	11727163_a_at	-1.75531	0.0196
SNX24	11723769_at	-1.75162	0.0102
SESN2	11718325_at	-1.7452	0.0236
ID3	11716666_a_at	-1.74095	0.0218
---	11764247_s_at	-1.73521	0.0333
IGF2 /// INS-IGF2	11739787_a_at	-1.731	0.0025
CXCL5	11728716_x_at	-1.7304	0.036
HS3ST3B1	11763594_a_at	-1.72652	0.0285
CYorf15A	11759807_a_at	-1.72533	0.0235
SETBP1	11726870_at	-1.72503	0.017
CHAC1	11722407_a_at	-1.72384	0.0254
FOXC1	11753509_a_at	-1.72236	0.028
SRSF6	11745822_x_at	-1.7188	0.0196
PDGFD	11722856_a_at	-1.7188	0.0442
SGCD	11732317_a_at	-1.71468	0.0411
ST7L	11754186_x_at	-1.71409	0.0203
MT1X	11757581_x_at	-1.70999	0.0328
ADAM12	11722199_at	-1.70532	0.0218
CDH18	11734271_a_at	-1.70242	0.0292
VCAN	11748164_a_at	-1.69981	0.0199
TSC22D3	11717829_s_at	-1.69866	0.0278
RHOBTB3	11758664_s_at	-1.69808	0.0249
WARS	11747666_a_at	-1.69664	0.0255
CFD	11725980_at	-1.69549	0.0398
OSBPL8	11718645_a_at	-1.69463	0.0412
JAM2	11746455_a_at	-1.69291	0.0222
SAA1 /// SAA2	11756072_s_at	-1.69205	0.0404
PLXNA4	11727712_at	-1.69176	0.037
C8orf59	11751867_a_at	-1.68549	0.04
RHOBTB1	11719552_a_at	-1.68492	0.028
SEMA3D	11731195_at	-1.67392	0.0411
KIAA1462	11743783_a_at	-1.67196	0.029
EPHX2	11754640_a_at	-1.6714	0.0216
GPC6	11726015_at	-1.66528	0.0235
EPHA4	11723441_a_at	-1.66168	0.0245
TPM1	11730961_a_at	-1.65782	0.0499
PLEKHH2	11720452_at	-1.65399	0.0292
CA13	11730049_at	-1.65371	0.0346
KIAA0564	11758607_s_at	-1.65017	0.0166
EPHA3	11727583_a_at	-1.64636	0.0164
GRHL1	11727556_a_at	-1.64231	0.0176
FMOD	11716826_a_at	-1.64123	0.0379
FZD7	11721752_at	-1.63934	0.041
SLC38A1	11717102_a_at	-1.63881	0.0249
LEPREL1	11743417_a_at	-1.63079	0.0325
UCHL1	11757915_s_at	-1.62999	0.039
RAB39B	11728851_s_at	-1.62973	0.0488
ALDH1L2	11740521_a_at	-1.62787	0.0384
MANBA	11758386_s_at	-1.61996	0.0166
DOK5	11724534_a_at	-1.61655	0.0409
WSB1	11760501_a_at	-1.61603	0.0285
SOX4	11757741_s_at	-1.61551	0.0349
IGF1	11729818_s_at	-1.60746	0.0399
SMYD3	11737982_a_at	-1.60643	0.0415
BHLHE41	11758031_s_at	-1.60282	0.0425
SESN3	11731901_a_at	-1.60102	0.0423
SORBS1	11725742_a_at	-1.59388	0.0291
FHOD3	11721068_a_at	-1.59236	0.0216
IVNS1ABP	11720760_x_at	-1.59109	0.0362
COBLL1	11743352_s_at	-1.57431	0.0397
INTU	11730074_a_at	-1.57406	0.0361
PPP1R14A	11719121_a_at	-1.57011	0.0389
EXOSC6	11735184_at	-1.56887	0.0382
COL4A1	11716638_s_at	-1.56814	0.039
ALDH1B1	11746588_a_at	-1.56789	0.0495
PI16	11723456_x_at	-1.56128	0.0485
HTR2A	11736752_x_at	-1.5528	0.0336
FKBP1A	11729707_at	-1.55111	0.0279
TM4SF20	11735171_at	-1.54536	0.0399
AMIGO2	11736246_a_at	-1.54154	0.0287
AGTR1	11740227_s_at	-1.53539	0.0424
NPNT	11718435_a_at	-1.53374	0.0373
KLHL2	11748596_a_at	-1.53327	0.0449
STEAP2	11727390_a_at	-1.53257	0.0375
PID1	11752820_a_at	-1.53186	0.0403
LAMP3	11725429_at	-1.53092	0.022
NEXN	11749172_x_at	-1.52765	0.0446
IKZF2	11730549_a_at	-1.52346	0.0329
ABCC9	11758382_s_at	-1.52253	0.0418
TCF7L2	11746314_s_at	-1.5223	0.0467
ITPR1	11739564_s_at	-1.52045	0.0424
PCDH7	11724983_at	-1.51976	0.0158
SLC16A1	11748355_a_at	-1.51791	0.0451
NEDD1	11741727_a_at	-1.50466	0.048
CLGN	11749190_a_at	-1.49701	0.0156
TMEM65	11743095_at	-1.48434	0.0398
GPR133	11731143_a_at	-1.48082	0.0385
PPAT	11731899_s_at	-1.47623	0.0494
PCOLCE2	11728451_a_at	-1.47341	0.0444
SGK1	11715931_s_at	-1.41985	0.0424
IGSF10	11728030_a_at	-1.41924	0.0286
LRRC17	11726291_a_at	-1.41103	0.0277
SPESP1	11724041_at	-1.40272	0.0396
MAB21L1	11743770_at	-1.39958	0.0111
KRT18	11757905_x_at	-1.35099	0.0139
KCNH1	11735587_a_at	-1.30157	0.0287
KIAA1324L	11741802_a_at	-1.29182	0.0365
SFRP2	11720607_a_at	-1.14377	0.0425
ACTC1	11720489_a_at	-1.11582	0.0449
APCDD1	11757736_s_at	10.3396	0
C10orf116	11717305_a_at	9.0589	0
EPDR1	11739072_at	5.0861	0
CLEC3B	11727867_a_at	5.0134	0
INHBB	11728829_at	4.9089	0
LY6K	11739798_a_at	4.8984	0
OLFML2A	11720277_a_at	4.732	0
NTN4	11717803_a_at	4.6679	0
SLC7A14	11743938_at	4.4113	0
PSPH	11763252_x_at	4.2253	0
ADH1B	11746898_x_at	4.22	0
GALNTL2	11726079_x_at	4.0622	0
HLA-DPA1	11715583_s_at	4.0155	0
ROBO2	11729987_s_at	3.8777	0
PSG4	11715206_x_at	3.8424	0
CD9	11763855_x_at	3.8385	0
TNFRSF19	11721736_s_at	3.8345	0
EMB /// EMBP1	11722888_s_at	3.7377	0
PPL	11722430_at	3.6915	0
OSR2	11723577_x_at	3.656	0
ADH1A /// ADH1B /// ADH1C	11722994_s_at	3.6241	0
AQP1	11715942_a_at	3.6149	0
CTSC	11731465_a_at	3.4988	0
NPTX1	11755325_s_at	3.4842	0
CLEC2B	11721303_at	3.3383	0
SEMA3A	11730391_at	3.2008	0.0005
CRIP1	11721704_a_at	3.1693	0.0002
STC1	11724196_s_at	3.1289	0.0011
FBXL2	11755039_s_at	3.0522	0
MLPH	11719265_a_at	3.0443	0
CARD16	11736761_at	2.9401	0
PTGDS	11756587_a_at	2.9221	0
PRUNE2	11718241_a_at	2.8814	0.0005
MBP	11732567_at	2.8778	0.0006
HSPB7	11754949_s_at	2.8565	0.0006
FAM65B	11724381_at	2.8527	0.0015
HOXC10	11723324_at	2.8087	0.0008
LRRN4CL	11733167_at	2.7918	0.0008
HSPB3	11726087_at	2.7684	0.0005
NT5E	11719174_a_at	2.7559	0.0008
C3orf72	11732921_at	2.744	0.0006
TRPV2	11755902_a_at	2.6958	0.0005
CCDC102B	11738200_a_at	2.6742	0.0008
LPPR4	11721183_at	2.6696	0.0008
TBX1	11732881_s_at	2.6542	0.0006
F10	11723802_at	2.6351	0.0006
DNAJC6	11745300_a_at	2.5858	0.0005
CST6	11724322_a_at	2.5771	0.0016
ST6GALNAC5	11758982_at	2.5599	0.0007
RAB38	11757999_s_at	2.5403	0.0015
DKK3	11734702_a_at	2.5394	0.0002
GRP	11756874_a_at	2.5057	0.0006
CA12	11754856_a_at	2.5015	0.0024
TMSB15A	11720240_at	2.4948	0.0012
CRIP2	11747671_x_at	2.4893	0.0002
PTN	11723961_s_at	2.4764	0.0005
NOV	11723033_at	2.473	0.0025
KIAA1644	11758406_s_at	2.4716	0.0021
EMP1	11758781_at	2.4598	0.0007
CPNE8	11739823_a_at	2.4423	0.0007
PKIG	11728295_a_at	2.4377	0.0019
TMEM35	11722557_at	2.4198	0.0054
SERPINB2	11716631_s_at	2.4191	0.0024
PENK	11720425_a_at	2.4138	0.0009
KCNJ2	11730465_at	2.3892	0.0025
AHNAK2	11717131_a_at	2.3889	0.0018
HOXC11	11734267_a_at	2.3632	0.0025
DSG2	11725524_s_at	2.3627	0.0034
MYBL1	11725861_a_at	2.3321	0.0019
FAM134B	11753179_s_at	2.3233	0.0025
DENND2A	11721756_a_at	2.3197	0.0007
SIPA1L2	11757924_s_at	2.3189	0.002
HLA-DRA	11744484_s_at	2.3098	0.0035
TJP2	11716744_x_at	2.2996	0.0025
XIST	11757733_s_at	2.2991	0.004
FAM180A	11728596_a_at	2.2988	0.0025
CLEC2A	11751834_a_at	2.2946	0.0031
FOXL2	11728593_at	2.2922	0.0026
SYTL2	11755671_a_at	2.292	0.0055
DTNA	11734808_s_at	2.2887	0.0039
STEAP3	11722678_a_at	2.2833	0.0013
PLXNC1	11759184_at	2.2762	0.0053
STMN2	11751844_a_at	2.276	0.004
STEAP4	11720007_a_at	2.2589	0.0054
PSG5	11727592_x_at	2.2579	0.0013
CDC25B	11718005_a_at	2.2523	0.0017
COL18A1	11716281_a_at	2.249	0.0039
HLA-DPB1	11758369_x_at	2.2426	0.0034
CAPG	11744276_a_at	2.2371	0.0022
TFPI	11723951_a_at	2.2294	0.0044
PHLDA1	11721307_at	2.2261	0.0027
TMEM158	11724275_s_at	2.1964	0.0031
PRELP	11727893_at	2.189	0.0027
DAPK1	11720146_a_at	2.1817	0.0068
MEOX2	11723752_s_at	2.1661	0.0021
GDF5	11735374_a_at	2.1628	0.0038
PSG1 /// PSG8	11738879_s_at	2.157	0.0039
SAMD5	11726174_at	2.153	0.0038
KRT34	11729374_at	2.1521	0.0071
KRTAP1-5	11729095_at	2.1484	0.0053
S100A4	11718064_a_at	2.148	0.0039
C7orf58	11726485_at	2.1444	0.0039
UBASH3B	11727816_at	2.1333	0.0039
LOC404266	11759610_at	2.1333	0.0053
RGMB	11721793_at	2.1322	0.0044
S1PR3	11725905_a_at	2.1286	0.0039
EVI2A	11733841_a_at	2.1085	0.0045
FAM20A	11744893_a_at	2.1027	0.0055
TNFRSF11B	11730319_at	2.0947	0.0331
VIT	11727622_a_at	2.0945	0.0149
LEPR	11726871_s_at	2.0863	0.0045
ITGA7	11718243_a_at	2.0844	0.0049
CCRL1	11737108_a_at	2.0816	0.0052
EHD3	11719596_at	2.0807	0.0047
CDON	11739783_a_at	2.0768	0.0086
FABP3	11742981_a_at	2.0434	0.0049
LYN	11718085_s_at	2.0346	0.0035
FAM46C	11739339_s_at	2.0339	0.0191
SLC16A4	11749023_a_at	2.0333	0.0039
DUSP4	11744162_a_at	2.027	0.0122
KLF4	11719633_a_at	2.0245	0.0055
TOM1L1	11747285_a_at	2.0182	0.0075
SQRDL	11718515_a_at	2.0181	0.0069
NEDD4L	11722425_s_at	2.0178	0.0076
COL13A1	11742450_a_at	2.0126	0.0044
SEPP1	11741874_x_at	2.0102	0.0138
WISP2	11735059_a_at	1.9998	0.0044
GCNT1	11735271_a_at	1.9944	0.0109
RUNX3	11740486_a_at	1.9852	0.0109
MFSD6	11744415_s_at	1.9822	0.0188
DDIT4L	11724796_at	1.9797	0.0154
OLA1	11730188_s_at	1.9792	0.0077
SELENBP1	11716401_a_at	1.979	0.007
ANPEP	11746965_a_at	1.9736	0.0049
KRT19	11731500_a_at	1.9729	0.0088
PSEN2	11723672_a_at	1.9707	0.008
CLEC12A	11729479_a_at	1.9676	0.016
OAS3	11723699_s_at	1.9644	0.0039
IRS1	11743628_at	1.9572	0.0067
DUSP1	11752993_a_at	1.9561	0.0133
NOTCH2 /// NOTCH2NL	11752984_s_at	1.9546	0.0213
ETS2	11758370_s_at	1.9532	0.0105
C13orf33	11736363_s_at	1.9512	0.0133
SBSN	11754559_a_at	1.9493	0.0298
SYNGR2	11744067_s_at	1.9491	0.0088
CD68	11729741_x_at	1.9465	0.0137
ARHGAP29	11723815_at	1.9412	0.019
NTF3	11758373_s_at	1.9385	0.0063
AHR	11751921_s_at	1.9364	0.0094
SVIL	11745431_a_at	1.9362	0.0166
AK5	11758511_s_at	1.9338	0.0109
CKB /// LOC100508025 /// LOC100508484	11753004_a_at	1.9328	0.0084
CLDN11	11747704_a_at	1.9319	0.0136
ACP5	11717981_a_at	1.9211	0.0055
ARHGAP22	11715167_at	1.9172	0.0078
SRGN	11742710_a_at	1.9138	0.012
NBL1	11715746_a_at	1.9118	0.0108
MAF	11733087_a_at	1.9089	0.018
SECTM1	11739527_a_at	1.9077	0.0133
MAD1L1	11724206_a_at	1.9055	0.008
NTNG1	11757603_a_at	1.8929	0.0163
LRRC2	11740095_a_at	1.8913	0.0133
S100A3	11727269_at	1.891	0.0065
CAV1	11757013_x_at	1.8864	0.008
SEMA3B	11744491_x_at	1.8835	0.0062
TBC1D8	11723525_at	1.8822	0.0224
2002-03-01	11724410_x_at	1.8795	0.0053
IGFBP6	11717909_at	1.8793	0.0055
PLCD1	11718816_a_at	1.8697	0.0109
PHLDA2	11744005_at	1.8645	0.0109
CD320	11717750_a_at	1.8613	0.0105
ITGA3	11756790_a_at	1.8562	0.0152
GRIA1	11739499_a_at	1.856	0.0104
THBS4	11721212_a_at	1.8544	0.0039
AIM1	11719247_at	1.8496	0.007
HOMER3	11763856_a_at	1.849	0.0053
ABLIM3	11725428_a_at	1.8485	0.0189
CDC20	11717163_s_at	1.8485	0.0283
EZR	11742990_x_at	1.8479	0.0109
CD59	11718102_at	1.8472	0.0279
ABI3BP	11748945_a_at	1.8464	0.0159
HLA-F	11718231_x_at	1.8454	0.0113
APOL1	11763986_a_at	1.8453	0.0191
NMB	11721357_at	1.8435	0.0134
MRGPRF	11751430_a_at	1.8425	0.0109
MAP7	11757918_s_at	1.8356	0.0172
NIPAL3	11725627_at	1.8352	0.0222
CADPS2	11754806_s_at	1.8346	0.0208
BIRC5	11733864_a_at	1.8305	0.0259
PODXL	11736678_s_at	1.8303	0.0181
SLC1A2	11718492_at	1.8293	0.0205
CD44	11742043_a_at	1.8224	0.0153
DCN	11763262_at	1.8192	0.0064
SCIN	11731607_a_at	1.8187	0.0445
C14orf139	11754198_at	1.818	0.0151
CIT	11744436_a_at	1.8173	0.0244
RTEL1 /// TNFRSF6B	11720020_x_at	1.8157	0.0139
CARD16 /// CASP1	11750552_s_at	1.8077	0.0096
GALNT14	11718369_a_at	1.8069	0.0466
CRLF1	11721368_at	1.8045	0.008
ITGA6	11739861_s_at	1.8027	0.0214
SYNPO2	11731555_at	1.8023	0.0261
TLE1	11740414_a_at	1.8005	0.0177
TXNRD2	11745000_x_at	1.7996	0.011
DNALI1	11719321_a_at	1.7909	0.0222
PLAUR	11742819_at	1.7902	0.0169
TFAP2C	11726192_at	1.7883	0.0127
HPCAL1	11724552_s_at	1.7861	0.0134
C10orf10	11751548_a_at	1.7852	0.026
PCP4	11722232_a_at	1.7838	0.0192
STMN1	11753704_a_at	1.7833	0.0212
C21orf7	11747047_a_at	1.7815	0.0324
CSTF3	11723798_a_at	1.7805	0.0213
GINS1	11728863_at	1.7772	0.0263
HOXC9	11744241_at	1.7739	0.0212
TYMS	11751805_a_at	1.7734	0.0341
TNXA /// TNXB	11735913_s_at	1.7728	0.0152
LRRC8C	11723591_at	1.7721	0.0225
FUCA1	11755695_a_at	1.7711	0.0287
CDCA7	11758478_s_at	1.7688	0.0153
HMGA1	11747361_x_at	1.7686	0.0221
DNASE1L1	11755208_a_at	1.7642	0.0143
LSS	11717620_a_at	1.7626	0.0115
PCDH10	11731432_at	1.7607	0.0168
ENG	11752197_x_at	1.7605	0.0221
RAET1G /// RAET1L /// ULBP2	11756861_s_at	1.7591	0.0259
MREG	11743881_s_at	1.7577	0.0296
KIAA1671	11755104_a_at	1.7562	0.036
LOC100294376 /// TECR	11730198_s_at	1.7548	0.011
SERPINE2	11741678_a_at	1.7537	0.023
TNFRSF21	11753764_s_at	1.7505	0.0205
ANXA3	11756334_x_at	1.7488	0.0222
TGFBR3	11718900_a_at	1.7474	0.0234
BHMT2	11746667_a_at	1.7414	0.0443
FAM64A	11723747_a_at	1.7392	0.0279
MMD	11718936_s_at	1.7376	0.0245
LMNA	11752673_x_at	1.737	0.0192
MATN2	11722791_s_at	1.7365	0.0361
ADORA2B	11741056_a_at	1.7357	0.0319
RIN1	11725896_x_at	1.7355	0.018
HSPA2	11724723_a_at	1.7309	0.0163
JUP	11716343_a_at	1.7295	0.0118
LY6E	11715419_at	1.7279	0.0091
EBP	11717859_a_at	1.7275	0.0137
SMTN	11732021_x_at	1.7216	0.0309
ELFN1	11728082_s_at	1.7201	0.0221
FAM101A	11741413_a_at	1.7199	0.0225
ALDH3B1	11741146_x_at	1.7174	0.0295
KCNS3	11722918_a_at	1.7152	0.0192
FOXQ1	11758028_s_at	1.7128	0.0324
TCF7	11755180_x_at	1.7127	0.0415
WNT5B	11719441_a_at	1.7091	0.0399
SPON2	11716526_x_at	1.7089	0.0296
FAM167B	11725887_at	1.7086	0.0192
ANKRD29	11744242_a_at	1.7075	0.0406
ZFP36L2	11715818_at	1.7071	0.0241
TECR	11755502_x_at	1.707	0.0165
PHF19	11722880_a_at	1.7067	0.0452
NRM	11758106_at	1.7061	0.0165
FOS	11749291_a_at	1.706	0.0498
CD14	11741519_s_at	1.7039	0.0366
HMGCS1	11716987_a_at	1.7036	0.0202
SERPING1	11751845_x_at	1.7027	0.0331
ASL	11746742_a_at	1.7022	0.0278
JUN	11718397_s_at	1.7018	0.0476
DKK2	11728089_a_at	1.7007	0.012
GLUL	11744337_a_at	1.7007	0.03
CBR3	11756032_a_at	1.6973	0.0332
TBXA2R	11752118_x_at	1.6971	0.0314
EMP3	11718140_a_at	1.6961	0.0171
ANGPTL2	11718267_a_at	1.696	0.031
CASP1	11750553_x_at	1.6914	0.0192
PYCARD	11721169_a_at	1.6902	0.0197
XRCC6BP1	11743376_at	1.6888	0.0294
BTD	11718202_a_at	1.6864	0.0431
GLDN	11731172_s_at	1.6862	0.0298
GLIPR1	11721841_at	1.6847	0.0359
COMP	11750735_a_at	1.6836	0.0287
NUCB2	11763187_a_at	1.6808	0.0212
KLF6	11716094_a_at	1.6799	0.0361
HSPA12A	11755175_a_at	1.6796	0.0317
DUT	11726597_a_at	1.6795	0.037
P4HTM	11742709_s_at	1.6794	0.0191
TAPBPL	11721460_s_at	1.6783	0.0268
TSHZ2	11758468_s_at	1.6775	0.0299
ANKDD1A	11726243_a_at	1.6654	0.025
RSPO3	11724619_at	1.6623	0.0298
NTHL1	11721157_at	1.6592	0.0361
ZNF321	11749609_s_at	1.659	0.0348
ALDH3A2	11720503_a_at	1.6582	0.039
CD40	11731818_a_at	1.6581	0.0286
SDPR	11725695_s_at	1.6568	0.0478
LAMA4	11722282_a_at	1.6566	0.0453
REEP2	11721847_a_at	1.6557	0.0404
PTGFR	11734180_a_at	1.6528	0.0314
OSBPL5	11735166_x_at	1.6527	0.0232
SMAGP	11753888_x_at	1.6527	0.0419
SH3BP2	11724312_a_at	1.6512	0.0286
FBXO27	11734106_x_at	1.6503	0.0317
TIMP3	11715436_at	1.6497	0.0302
SLC9A9	11757926_s_at	1.6465	0.0457
ANKRD28	11722637_a_at	1.6457	0.0345
RNF182	11737774_a_at	1.6454	0.0226
MOXD1	11719602_a_at	1.6453	0.0325
2009-09-01	11747883_x_at	1.6446	0.0409
KIAA1217	11731663_a_at	1.6416	0.0481
SGIP1	11751975_a_at	1.6412	0.04
MYLIP	11718006_a_at	1.6411	0.0225
DHCR24	11715460_a_at	1.6397	0.0365
MEST	11717196_a_at	1.6396	0.0153
PAOX	11721408_a_at	1.6378	0.0459
SLC47A1	11752489_s_at	1.6351	0.036
TSPAN4	11740991_a_at	1.6336	0.0406
TBC1D2	11728289_a_at	1.633	0.0488
SNRPA	11744270_a_at	1.6326	0.048
SLC37A4	11716064_a_at	1.6318	0.0483
CD74	11726254_s_at	1.6316	0.0402
PAM	11743829_a_at	1.6315	0.0404
GFRA1	11747055_a_at	1.6309	0.0456
DBC1	11747118_a_at	1.6306	0.022
HIST1H2BD	11728152_a_at	1.6291	0.0452
RAB7B	11754764_a_at	1.6269	0.0385
KIAA1211	11735051_a_at	1.6269	0.0392
AHRR	11729561_a_at	1.6266	0.0491
GSTT2 /// GSTT2B	11722903_s_at	1.6197	0.0332
APOBEC3A /// APOBEC3B	11732901_a_at	1.6196	0.0411
PLEKHG1	11723903_at	1.618	0.0302
STEAP1	11760443_at	1.6141	0.04
SLC35B2	11718664_a_at	1.6141	0.0404
NCS1	11720400_at	1.6138	0.0492
C1orf93	11735653_a_at	1.613	0.0451
PLP2	11723032_a_at	1.6127	0.0491
ETHE1	11717113_a_at	1.6109	0.0278
CLEC11A	11716922_x_at	1.6091	0.026
CNPY3	11739119_s_at	1.6084	0.0279
SLC27A1	11722952_a_at	1.6048	0.0458
FGF5	11737451_a_at	1.6033	0.0457
RBP1	11717349_a_at	1.6021	0.012
KIRREL3	11746716_s_at	1.6018	0.0305
NAGPA	11743388_a_at	1.6014	0.0436
TMEM187	11719619_at	1.6004	0.0324
PDPN	11724736_x_at	1.5964	0.0392
PCDHGA1 /// PCDHGA10 /// PCDHGA11 /// PCDHGA12 /// PCDHGA2 /// PCDHGA3 /// PCDHGA4 /// PCDHGA5 /// PCDHGA6 /// PCDHGA7 /// PCDHGA8 /// PCDHGA9 /// PCDHGB1 /// PCDHGB2 /// PCDHGB3 /// PCDHGB4 /// PCDHGB5 /// PCDHGB6 /// PCDHGB7 /// PCDHGC3 /// PCDHGC4 /// PCDHGC5	11735816_s_at	1.5897	0.0391
ECM1	11717891_a_at	1.5863	0.0424
SDK2	11729958_at	1.5835	0.0412
FAM108C1	11726050_a_at	1.583	0.0481
C17orf101	11725561_a_at	1.581	0.0345
HCFC1R1	11726189_x_at	1.5758	0.0432
FXYD5	11718290_a_at	1.5697	0.0359
C10orf58	11756668_x_at	1.5696	0.0367
SH3BGRL3	11715919_a_at	1.5678	0.0495
LNX1	11730250_a_at	1.5244	0.046
CTSH	11757383_a_at	1.5155	0.04
METTL7A	11757815_s_at	1.5083	0.0491
TMTC1	11718651_at	1.5035	0.0481
C13orf15	11717582_a_at	1.4994	0.0457
CADM1	11728806_a_at	1.4808	0.0223
IL13RA2	11757033_a_at	1.4754	0.0346
MASP1	11756901_a_at	1.4672	0.0408
CPXM2	11719536_at	1.3975	0.0347
PDGFRL	11723535_at	1.3416	0.0202

## Sheet: PAA-P
Gene symbol	AffyID	FC	FDR
PSAT1	11742991_a_at	-4.44444	0
ASNS	11748793_a_at	-3.22789	0
SLC7A11	11721876_s_at	-3.17058	0
CBS	11744286_s_at	-3.13283	0
SEL1L3	11753915_a_at	-3.12793	0
TRIB3	11719811_a_at	-2.80741	0
PHGDH	11728203_a_at	-2.74725	0
PCK2	11719089_a_at	-2.72331	0
DDIT4	11743972_a_at	-2.62881	0
GRIA1	11739499_a_at	-2.31535	0
GPR1	11732319_a_at	-2.31374	0
CSTA	11719480_a_at	-2.27739	0
MTHFD2	11745870_a_at	-2.20994	0
MEST	11717196_a_at	-2.20702	0
WARS	11726287_a_at	-2.20022	0
ITIH5	11734676_at	-2.17061	0
GDF15	11716663_a_at	-2.12269	0
KRTAP1-5	11729095_at	-2.11327	0
TPD52L1	11720704_s_at	-2.1097	0
SYBU	11721430_a_at	-2.09118	0
HLA-DRA	11742850_x_at	-2.07987	0
SLC7A5	11739061_at	-2.07555	0
IL20RB	11727589_a_at	-2.06058	0
ANKRD37	11721917_a_at	-2.05973	0
MOCOS	11727675_at	-2.04876	0
CEBPG	11717694_a_at	-2.03832	0
VEGFA	11725372_x_at	-2.03376	0
SLC3A2	11746697_a_at	-2.00602	0
EIF4EBP1	11718283_a_at	-1.95848	0
MKNK2	11739147_a_at	-1.94742	0
ATF5	11717801_a_at	-1.93986	0
SHMT2	11750992_x_at	-1.9253	0
TCEA1	11734918_s_at	-1.92456	0
ALDH2	11715627_x_at	-1.91461	0
MARS	11744024_a_at	-1.91314	0
FAM129A	11739155_s_at	-1.89215	0
SLC1A5	11716866_x_at	-1.89179	0
SLC25A37	11744559_a_at	-1.84911	0
LOXL2	11751288_a_at	-1.83688	0
SULF1	11737874_a_at	-1.82782	0
SERPINE1	11746856_a_at	-1.82648	0
CPA4	11729128_at	-1.82515	0
NCRNA00275	11744365_a_at	-1.81291	0
INHBE	11736262_at	-1.81061	0.0001
NCRNA00219	11744369_s_at	-1.77778	0
FOS	11734658_s_at	-1.76866	0
FKBP9	11763552_x_at	-1.74277	0
DHRS3	11716835_a_at	-1.73853	0
EEF2	11715781_a_at	-1.73732	0
SLC22A15	11733955_at	-1.72414	0.0006
DKK1	11718141_at	-1.71556	0.0001
SARS	11744142_a_at	-1.68976	0.0006
FADS3	11719032_a_at	-1.68862	0.0005
BDNF	11733751_s_at	-1.67448	0.0025
KCNMA1	11750376_a_at	-1.67001	0.0005
ASS1	11757278_x_at	-1.66945	0.0008
AKNA	11730935_a_at	-1.6603	0.0001
LONP1	11748721_a_at	-1.6581	0.0002
PLCB1	11730106_a_at	-1.62866	0.002
HES1	11716551_s_at	-1.62813	0.0348
RPL37	11759114_at	-1.61629	0.0002
SLC1A4	11730614_a_at	-1.61264	0.0005
COL6A1	11715406_a_at	-1.61134	0.002
STC1	11724197_at	-1.60823	0.0288
TRIM16 /// TRIM16L	11749777_s_at	-1.60154	0.0027
CXCL2	11744127_at	-1.60102	0.0036
CCPG1	11723007_a_at	-1.59847	0.0005
RNF144B	11731082_at	-1.58957	0.0007
HSPA9	11759417_s_at	-1.5868	0.0005
FHL1	11753598_a_at	-1.5868	0.0047
CDH13	11752562_x_at	-1.58328	0.0023
KCTD15	11758536_s_at	-1.58178	0.0007
EIF2S2	11723916_at	-1.57332	0.0017
PAMR1	11750650_a_at	-1.57332	0.0246
ULBP1	11730619_at	-1.57257	0.0037
AK4	11731833_a_at	-1.55885	0.0037
IGFBP3	11749912_x_at	-1.55739	0.0013
PPPDE2	11718606_a_at	-1.54991	0.0006
TNXA /// TNXB	11735913_s_at	-1.54751	0.0029
CITED2	11753421_a_at	-1.54679	0.0006
RDH10	11758544_s_at	-1.5444	0.0041
PSPH	11730796_x_at	-1.54226	0.0006
KLF2	11758208_s_at	-1.53539	0.001
B3GALT2	11729250_at	-1.5328	0.0036
RNF187	11730196_at	-1.52742	0.0022
DDIT3	11758347_s_at	-1.52742	0.0033
SLC6A9	11737326_a_at	-1.52555	0.0068
CYFIP2	11755109_a_at	-1.52509	0.0041
ZNF581	11724000_a_at	-1.52509	0.005
BCAT1	11749895_a_at	-1.52462	0.0021
LAMP3	11725429_at	-1.52369	0.0469
ABCA8	11721557_a_at	-1.52068	0.0021
SIRT5	11749229_a_at	-1.51953	0.0021
GTPBP2	11717184_a_at	-1.51607	0.0007
IRS2	11718013_at	-1.51492	0.0027
GLT25D2	11724167_s_at	-1.50648	0.0099
MDK	11718037_x_at	-1.50625	0.0043
LOC652797 /// PKM2	11752165_s_at	-1.50376	0.0037
RPL32	11757122_s_at	-1.50195	0.0015
GFRA1	11724132_at	-1.5015	0.0063
ID1	11753661_a_at	-1.50038	0.0291
TNFRSF11B	11730319_at	-1.4997	0.0104
F3	11755733_a_at	-1.49254	0.0035
DMKN	11741539_x_at	-1.49098	0.0021
COMT	11754132_x_at	-1.48566	0.005
P4HA1	11730853_s_at	-1.48368	0.0033
BNC1	11735400_a_at	-1.48104	0.0149
IARS	11751966_a_at	-1.47842	0.0077
TFRC	11756156_s_at	-1.47776	0.0071
ENOX1	11724957_a_at	-1.47754	0.0045
FAM19A5	11758614_s_at	-1.47406	0.0183
BBC3	11727706_a_at	-1.47319	0.0077
PKM2	11752166_x_at	-1.47016	0.0113
LMCD1	11750298_a_at	-1.46929	0.0166
ECSIT	11718417_a_at	-1.46864	0.0092
DKK3	11734702_a_at	-1.46864	0.0452
PAPPA	11727014_at	-1.46757	0.0071
LYPD6B	11744596_a_at	-1.46692	0.0043
C9orf150	11720514_at	-1.46628	0.0043
RNF41	11755859_a_at	-1.46542	0.0099
RPGR	11726119_at	-1.46499	0.0024
FAM86C	11715113_x_at	-1.46306	0.0031
SCRG1	11718605_a_at	-1.46263	0.0078
OSBPL6	11750599_a_at	-1.46113	0.0077
LETMD1	11753594_x_at	-1.46071	0.0076
JUB	11726013_a_at	-1.45964	0.0073
GDAP1	11739561_at	-1.45943	0.0209
TXNRD1	11715650_a_at	-1.45858	0.0043
MARCH4	11726193_at	-1.45773	0.0017
ZKSCAN2	11726941_at	-1.45624	0.004
TNFRSF10D	11723310_at	-1.45455	0.0076
GALNTL2	11726079_x_at	-1.45328	0.0186
MT1F	11721877_s_at	-1.45328	0.0396
SHISA5	11751128_x_at	-1.45138	0.0061
CHAC1	11722407_a_at	-1.44991	0.0155
CES2	11728677_a_at	-1.4497	0.0139
MAMLD1	11755364_a_at	-1.44781	0.0078
TCEA2	11741773_x_at	-1.4455	0.0223
C9orf9	11742401_a_at	-1.44467	0.0134
RCAN1	11743732_a_at	-1.44404	0.0099
SLC2A1	11756238_s_at	-1.44342	0.0208
CXCL1	11719366_s_at	-1.44196	0.026
LRRC49	11716552_a_at	-1.44092	0.0125
COL4A2	11715451_a_at	-1.44071	0.0271
CDH2	11726614_at	-1.43988	0.0049
DOM3Z	11756558_s_at	-1.43968	0.0129
CXCL6	11730801_at	-1.43885	0.0161
FAM60A	11716746_a_at	-1.43823	0.026
COL15A1	11720431_s_at	-1.43493	0.0027
PTX3	11718157_s_at	-1.43493	0.0308
C8orf58	11725003_s_at	-1.43266	0.0125
HIRA	11751996_a_at	-1.4298	0.0081
HK2	11756138_a_at	-1.4298	0.0278
NADSYN1	11754339_a_at	-1.42755	0.0082
QTRT1	11754747_x_at	-1.42389	0.019
SH3BGR	11721031_a_at	-1.42288	0.0073
HEXDC	11732650_a_at	-1.42288	0.0394
C16orf53	11720804_a_at	-1.42268	0.001
FXYD5	11718290_a_at	-1.42248	0.0278
OXTR	11739390_at	-1.41723	0.0295
DOK1	11751046_a_at	-1.41603	0.0224
YARS	11758118_s_at	-1.41583	0.0201
NFE2L1	11739076_x_at	-1.41563	0.0231
NGF	11729937_at	-1.41403	0.0163
ARHGEF2	11754291_s_at	-1.41323	0.021
RPS6KA2	11743831_s_at	-1.41283	0.0082
TNFSF4	11731896_a_at	-1.41223	0.0082
ST6GALNAC5	11751438_a_at	-1.41223	0.0186
G0S2	11744219_at	-1.41163	0.028
FLNA	11752142_a_at	-1.41064	0.026
NBL1	11715747_a_at	-1.41064	0.0336
PSMF1	11755356_x_at	-1.40964	0.0188
VLDLR	11721181_a_at	-1.40905	0.0246
THBS3	11722043_a_at	-1.40905	0.0344
LRRC28	11744753_a_at	-1.40865	0.0412
WDR74	11744382_a_at	-1.40786	0.0186
SEMA3B	11744491_x_at	-1.40627	0.0345
RPS29	11730323_at	-1.4043	0.0447
LTBP3	11749482_x_at	-1.40272	0.0166
GULP1	11751678_a_at	-1.40193	0.0278
FKBP8	11743134_x_at	-1.40135	0.0218
ABCC3	11748362_s_at	-1.40095	0.0419
PYGB	11715808_a_at	-1.40036	0.0236
TMEM134	11747375_a_at	-1.39958	0.0166
SNHG7 /// SNORA43	11755132_s_at	-1.39919	0.0169
KLF16	11753184_s_at	-1.39919	0.0171
TIMP3	11715435_s_at	-1.3988	0.0169
DPH5	11756500_x_at	-1.3986	0.0236
MIB2	11744135_a_at	-1.39841	0.0219
CNN2	11723414_a_at	-1.39626	0.0162
NHEJ1 /// SLC23A3	11727872_at	-1.39373	0.023
BGN	11721244_a_at	-1.39082	0.0084
FGF2	11725041_at	-1.39082	0.0236
GRB10	11734495_a_at	-1.38985	0.0406
APOL6	11732244_at	-1.38966	0.0418
EIF3C /// EIF3CL	11755846_s_at	-1.38658	0.0279
ITGA11	11739976_a_at	-1.38619	0.0316
C5orf28	11746391_a_at	-1.38389	0.0186
XPOT	11716831_at	-1.38389	0.0421
AIMP2	11716562_at	-1.38332	0.0249
TUBE1	11732219_a_at	-1.38274	0.0186
EGR2	11722728_a_at	-1.3816	0.0082
GPT2	11719162_a_at	-1.38122	0.0226
FOXD1	11728563_at	-1.38122	0.0273
PEMT	11731113_a_at	-1.38102	0.0407
PABPC4	11754030_a_at	-1.38045	0.0242
FHL2	11741106_x_at	-1.38045	0.0349
HAX1	11741031_a_at	-1.37931	0.0242
NSMAF	11740559_a_at	-1.37912	0.0345
SYNPO	11719305_at	-1.37855	0.0437
RAB24	11756309_x_at	-1.37836	0.0206
ZNF419	11740122_a_at	-1.37779	0.0171
HMGA1	11753817_x_at	-1.37741	0.0114
C6orf48	11715978_a_at	-1.37627	0.0231
PFN2	11753674_a_at	-1.37608	0.0495
RMND1	11751591_s_at	-1.37589	0.0188
ZNF213	11763589_a_at	-1.37571	0.0135
EVI2B	11743813_a_at	-1.37533	0.0149
CBX7	11717993_at	-1.374	0.0388
SESN2	11718324_s_at	-1.37306	0.0231
FBXO17 /// SARS2	11728897_x_at	-1.37287	0.0233
FAM165B	11759611_at	-1.37212	0.0187
TIMM44	11744280_a_at	-1.36949	0.0345
PLSCR3	11752824_a_at	-1.36911	0.0292
EPAS1	11715411_a_at	-1.36893	0.0437
KRT19	11731500_a_at	-1.36631	0.0213
RSL1D1	11736010_at	-1.36631	0.0413
RBPMS	11719981_a_at	-1.36612	0.0439
SNHG8 /// SNORA24	11763889_x_at	-1.36482	0.044
GRINA	11716483_x_at	-1.36482	0.0455
CPSF4	11747753_a_at	-1.36426	0.037
TRIM16	11728668_x_at	-1.36333	0.0493
TBRG4	11734700_a_at	-1.36221	0.0208
PKD1P1	11724355_x_at	-1.36203	0.0422
PPAN /// PPAN-P2RY11	11720212_a_at	-1.36203	0.0308
MYH9	11752052_x_at	-1.36147	0.0436
PIGG	11754328_a_at	-1.36147	0.0461
ARL4D	11758247_x_at	-1.36129	0.0395
IL31RA	11763997_a_at	-1.36054	0.0291
C3orf19	11722125_a_at	-1.35999	0.0226
CDH11	11753109_a_at	-1.3574	0.0484
PHKA2	11723979_s_at	-1.35593	0.0354
LOC150786 /// RAB6A /// RAB6C	11747777_s_at	-1.35428	0.0385
MTHFD1L	11728984_a_at	-1.3541	0.0421
CSK	11740061_a_at	-1.35245	0.042
---	11763367_at	-1.35099	0.05
ST6GALNAC4	11754275_s_at	-1.34953	0.0373
MORN4	11727450_a_at	-1.34898	0.0494
GOT2	11747589_a_at	-1.34844	0.0335
DUSP1	11715765_a_at	-1.34698	0.0428
THBS1	11721091_a_at	-1.34662	0.0467
ZCWPW1	11732427_a_at	-1.34499	0.0498
EVI2A	11733841_a_at	-1.343	0.0472
MXI1	11730499_a_at	-1.343	0.0394
PDLIM4	11730740_a_at	-1.34138	0.0222
WDR45L	11750162_a_at	-1.34102	0.0362
CCL2	11716384_at	-1.34066	0.0364
GAMT	11735225_x_at	-1.34012	0.0006
MKRN2	11749873_s_at	-1.33618	0.0174
PTGDS	11756587_a_at	-1.33103	0.0281
C19orf48	11733827_a_at	-1.32943	0.0219
MEGF6	11727947_at	-1.32556	0.0188
LYRM4	11721320_s_at	-1.3224	0.0406
TRMT1	11757352_a_at	-1.31926	0.0271
ZC3H8	11725781_at	-1.31891	0.044
DUSP6	11744435_a_at	-1.31822	0.0281
SLC47A1	11752489_s_at	-1.31804	0.0493
CSRP1	11754068_a_at	-1.317	0.0298
TMEM171	11732818_at	-1.31337	0.0401
BCAR3	11719608_a_at	-1.31268	0.0444
NME5	11727538_at	-1.31062	0.0494
MAN1B1	11752272_a_at	-1.30993	0.0438
BCL2	11721377_x_at	-1.30225	0.0232
CLCF1	11725767_at	-1.29904	0.0261
PMS1	11748651_a_at	-1.29383	0.0417
EIF4A1	11762280_a_at	-1.29016	0.0252
SLC27A5	11757586_a_at	-1.26056	6.13266
GAS7	11739553_a_at	-1.25549	6.28484
DIO2	11721579_a_at	4.482	0
THBS4	11721212_a_at	2.8377	0
WFDC1	11727601_a_at	2.5841	0
COL10A1	11735218_at	2.4221	0
RSPO3	11724619_at	2.3635	0
OGN	11736191_s_at	2.3625	0
FMO1	11754496_x_at	2.3009	0
SLC40A1	11715788_a_at	2.2816	0
C1QTNF3	11734565_s_at	2.2804	0
TRIL	11726903_at	2.2708	0
---	11763373_at	2.2677	0
AQP1	11715942_a_at	2.2474	0
APOBEC3A /// APOBEC3B	11732901_a_at	2.2448	0
APOBEC3B	11732902_x_at	2.1829	0.0002
DPT	11744168_at	2.1617	0.0009
SMOC2	11715972_at	2.1446	0
MMP27	11735567_at	2.1364	0.0003
COL14A1	11757921_s_at	2.1127	0
SFRP2	11720606_a_at	2.1066	0
GUCY1A3	11722136_at	2.0728	0
ROBO2	11729988_x_at	2.0495	0
CENPF	11743295_a_at	2.0494	0
OLFML2B	11749326_s_at	2.0468	0.0002
DEPDC1	11730111_a_at	2.0141	0.0009
CHI3L1	11756316_a_at	2.0067	0.0002
PLXDC1	11726846_at	1.9935	0.0009
OIP5	11727543_at	1.9767	0.0009
PDGFRL	11723535_at	1.9687	0.0004
TTK	11723435_s_at	1.961	0.0009
CENPA	11758529_s_at	1.9573	0.001
ASPM	11748713_a_at	1.9071	0.0039
MTUS1	11716913_a_at	1.9025	0
KIAA1324L	11741802_a_at	1.9015	0.0002
TDO2	11755822_a_at	1.8876	0.0035
CEP55	11758261_s_at	1.875	0.0008
WNT2	11731558_a_at	1.8741	0.0061
PMEPA1	11716149_a_at	1.8596	0
MAP7	11757918_s_at	1.8545	0.0116
OMD	11728328_at	1.8388	0.005
SPON1	11724503_at	1.8364	0.0002
PTGER4	11725793_s_at	1.8363	0.0019
DLGAP5	11722367_a_at	1.8342	0
STEAP4	11720007_a_at	1.8286	0.0002
RORA	11726244_a_at	1.8207	0.0049
SHCBP1	11728404_at	1.819	0.0033
KIF20A	11723010_a_at	1.8154	0.0047
PHACTR3	11726088_s_at	1.8024	0.0039
NEK2	11722252_x_at	1.801	0.0002
DIRAS3	11725713_a_at	1.8009	0.002
IL7	11747034_a_at	1.7982	0.002
PDGFD	11722856_a_at	1.7902	0.004
BIRC5	11747720_a_at	1.7786	0.004
CASC5	11759328_at	1.7751	0.0112
LRRC15	11723164_a_at	1.766	0.0018
SPRY1	11717652_s_at	1.7599	0.0036
FLRT3	11739518_a_at	1.7595	0.006
TOP2A	11720970_at	1.7588	0.0048
BUB1B	11720647_a_at	1.7585	0.0055
ANLN	11724465_a_at	1.7529	0.0084
CENPK	11743530_a_at	1.7504	0
CIT	11744436_a_at	1.7502	0.0068
ZWILCH	11754687_a_at	1.7345	0.0036
METTL7A	11757815_s_at	1.7339	0.0091
SGOL2	11753254_a_at	1.7265	0.0062
SPC24	11759151_at	1.7262	0.001
COL5A2	11739136_at	1.7254	0.002
CCRL1	11748896_s_at	1.7164	0.0184
PTGER3	11730484_at	1.7105	0.0039
CNTN4	11729021_a_at	1.7067	0.0038
TMTC3	11724918_a_at	1.7036	0.0091
HMMR	11758089_s_at	1.7003	0.0107
CDK1	11726617_s_at	1.6997	0.0009
ELN	11754442_x_at	1.6928	0.0029
MOBKL2B	11725168_s_at	1.6868	0.006
LRIG1	11755110_a_at	1.6828	0.0217
BUB1	11747230_a_at	1.6818	0.004
TMSB15A	11720240_at	1.6807	0.0093
CDKN3	11745464_x_at	1.6752	0.0085
SMC2	11745424_a_at	1.6725	0.0002
RGS4	11732993_a_at	1.6698	0.0012
PDPN	11724737_a_at	1.6665	0.0097
NUSAP1	11742735_a_at	1.6623	0.0002
COL1A1	11715352_x_at	1.6571	0.0186
PRC1	11716358_s_at	1.6564	0.0362
ZNF367	11728101_at	1.6559	0.0283
COL12A1	11763525_at	1.6558	0.0008
ZNF436	11743686_a_at	1.6531	0.0059
MEOX2	11723752_s_at	1.653	0.0049
STMN2	11717826_x_at	1.651	0.0011
SAMD5	11726174_at	1.6472	0.0049
TSPAN13	11755284_s_at	1.6456	0.0033
FAM46C	11739338_at	1.6419	0.0039
RGPD1 /// RGPD2 /// RGPD3	11731146_s_at	1.6411	0.0019
C10orf118	11731624_a_at	1.6399	0.0112
CKAP2	11723678_at	1.6355	0.0148
ANP32E	11725046_a_at	1.6339	0.0011
GPRC5B	11719176_a_at	1.6336	0.0002
HAPLN1	11725374_at	1.6327	0.0114
CKAP2L	11726724_a_at	1.632	0.0148
CCNB1	11723939_a_at	1.6297	0.0009
AQP9	11725702_a_at	1.6261	0.0091
NKD2	11735421_a_at	1.6259	0.0053
KDELC1	11755062_a_at	1.6248	0.0186
RRM2	11754360_a_at	1.6245	0.0211
RACGAP1	11758149_s_at	1.6232	0.0252
KIF15	11758371_s_at	1.6193	0.0036
ATP8B4	11730121_a_at	1.6158	0.0092
CDCA5	11718183_at	1.6147	0.0162
NDC80	11744274_at	1.6132	0.0116
CENPE	11754676_a_at	1.6112	0.0059
GNB4	11723103_x_at	1.6055	0.0162
CDC25C	11748104_a_at	1.6028	0.0038
RIPK3	11723020_a_at	1.6016	0
COL5A1	11717273_at	1.6005	0.0278
KIF14	11731888_a_at	1.6005	0.0039
EEA1	11724302_a_at	1.5976	0.0048
FAM134B	11753179_s_at	1.5962	0.0312
SPC25	11723998_at	1.5943	0.0003
COL3A1	11715414_x_at	1.5942	0.0011
SON	11734744_a_at	1.593	0.0079
MKI67	11721143_a_at	1.5928	0.0135
NOX4	11741143_x_at	1.5926	0.0062
IGF1	11729818_s_at	1.592	0.0148
PTTG1 /// PTTG3P	11717521_x_at	1.5919	0.0059
G2E3	11755470_x_at	1.5831	0.0095
ARHGAP28	11723981_s_at	1.5783	0.0087
ITGA4	11746767_a_at	1.5768	0.0179
DBF4	11734713_s_at	1.575	0.0108
MASP1	11756901_a_at	1.5737	0.0159
C14orf106	11731007_a_at	1.5721	0.0245
C18orf54	11729886_at	1.5686	0.0114
SMC4	11733875_a_at	1.568	0.0322
WDHD1	11725709_a_at	1.5669	0.0035
CPM	11731461_x_at	1.5658	0.0159
FAM83D	11730264_a_at	1.5653	0.0188
NPNT	11718435_a_at	1.561	0.0027
C13orf15	11717582_a_at	1.5605	0.0479
KIF2C	11745868_a_at	1.5554	0.0048
ESCO1	11725203_a_at	1.5549	0.0227
KIAA0101	11744425_a_at	1.5521	0.0251
ANGPTL1	11744707_a_at	1.5504	0.0485
ESCO2	11727968_at	1.5465	0.0152
CDKN2C	11758661_s_at	1.5458	0.0096
PDE7B	11757985_s_at	1.5447	0.0284
SYNE2	11756450_s_at	1.544	0.0279
FAM54A	11755624_a_at	1.5435	0.0062
C1QTNF6	11755769_a_at	1.5433	0.0237
NCAPH	11721854_a_at	1.5427	0.0186
DUSP4	11744162_a_at	1.5388	0.028
ACVR2A	11752492_a_at	1.5374	0.0106
RNF144A	11757347_s_at	1.5369	0.0409
SKA1	11722069_a_at	1.5359	0.0137
INMT	11720749_a_at	1.5355	0.0301
PBK	11723950_a_at	1.5306	0.0468
SPAG5	11720319_at	1.5291	0.0079
C14orf37	11734097_a_at	1.523	0.0136
MYCBP	11727802_s_at	1.523	0.0487
NCAPG	11722826_a_at	1.5206	0.0091
EXTL2	11750985_a_at	1.5199	0.0092
KCNMB2	11753777_a_at	1.5198	0.0143
GRIA3	11725753_a_at	1.5192	0.0054
QPRT	11724800_a_at	1.5148	0.0263
EDNRA	11719489_a_at	1.5142	0.028
CCNA2	11722571_at	1.5136	0.0003
FOXQ1	11758028_s_at	1.5125	0.0171
APOLD1	11719883_a_at	1.5116	0.0132
FAM63B	11730886_x_at	1.5114	0.0428
ADAMTS9	11719753_a_at	1.51	0.0349
C12orf48	11748736_x_at	1.5095	0.0322
UBE2C	11733695_a_at	1.5087	0.0113
APCDD1	11757736_s_at	1.5057	0.0107
SERPINB7	11738542_a_at	1.5051	0.0097
TCF4	11724242_s_at	1.5028	0.0105
KCNK6	11736458_x_at	1.498	0.0236
SLC1A2	11718492_at	1.496	0.0327
OAS3	11723699_s_at	1.4956	0.0097
SHOX2	11747149_a_at	1.4955	0.0211
WIPF1	11718569_a_at	1.4947	0.0039
FBXL5	11721315_s_at	1.493	0.0338
FAM111A	11719313_a_at	1.4913	0.041
ANKRD32	11751581_a_at	1.4902	0.0323
CENPW	11720827_a_at	1.49	0.0501
RAD51AP1	11747886_a_at	1.4836	0.0162
MAF	11733088_at	1.4822	0.0249
FGD6	11723186_at	1.4797	0.0075
SMARCA2	11743340_a_at	1.4796	0.024
GAS2L3	11734537_a_at	1.4796	0.0343
IGSF10	11728030_a_at	1.4776	0.0097
MBP	11732567_at	1.4769	0.0356
TCERG1	11755437_a_at	1.474	0.0389
FAM111B	11739932_a_at	1.4734	0.0114
LPAR6	11743071_a_at	1.4721	0.0185
CCNYL1	11722536_x_at	1.4713	0.0148
PDGFRA	11750772_a_at	1.4709	0.0147
CYP7B1	11740151_at	1.4703	0.0341
ASPN	11758636_s_at	1.4692	0.0339
NEURL1B	11718464_s_at	1.4677	0.041
SLC1A3	11726252_a_at	1.4654	0.0149
SAMHD1	11739149_a_at	1.465	0.0062
PLXNC1	11736207_a_at	1.4625	0.0399
VEPH1	11753981_a_at	1.4615	0.0298
GCC2 /// RGPD1 /// RGPD2 /// RGPD3 /// RGPD4 /// RGPD5 /// RGPD6 /// RGPD8	11752004_s_at	1.4607	0.0343
IFI44	11746088_a_at	1.4604	0.0247
C5orf13	11741506_x_at	1.4576	0.0467
VCAN	11748164_a_at	1.4575	0.0242
WWTR1	11759482_at	1.4568	0.0161
MRVI1	11721945_a_at	1.4565	0.0215
GALNT1	11750783_a_at	1.4559	0.0158
KREMEN1	11723729_at	1.4549	0.0394
ILF3	11740781_a_at	1.4534	0.0278
ARRDC4	11719761_at	1.4529	0.0154
UPF1	11754616_a_at	1.451	0.032
LOC100288142 /// NBPF1 /// NBPF10 /// NBPF11 /// NBPF12 /// NBPF14 /// NBPF16 /// NBPF24 /// NBPF8 /// NBPF9	11740652_x_at	1.4488	0.0136
PIK3R1	11748670_a_at	1.4487	0.0165
PIK3R3	11754316_a_at	1.4482	0.0139
CSRP2	11729239_x_at	1.4479	0.0147
SKI	11734996_at	1.4438	0.0069
PDP1	11722230_a_at	1.4409	0.0455
SGMS2	11722154_a_at	1.4399	0.0218
MAML3	11743879_at	1.438	0.0361
CSGALNACT1	11727223_a_at	1.4378	0.0214
SIKE1	11724012_at	1.4368	0.0354
CNTLN	11746299_a_at	1.4366	0.0162
RAP2B	11733945_at	1.4349	0.0319
VSNL1	11749996_a_at	1.433	0.0113
NFATC2	11763307_s_at	1.431	0.0317
ATRX	11755517_s_at	1.4306	0.0283
GUCY1B3	11726581_a_at	1.4293	0.0291
DDX3Y	11724076_a_at	1.429	0.0067
CEP350	11719051_a_at	1.428	0.0252
AGPAT4	11748797_a_at	1.4279	0.0468
RTN4	11738035_s_at	1.4278	0.0174
SPARC	11746554_a_at	1.4253	0.0444
ZNF608	11755450_a_at	1.4234	0.0256
TCTEX1D1	11740323_at	1.4216	0.0097
ZKSCAN1	11754860_a_at	1.4207	0.0179
PKP4	11743914_a_at	1.4166	0.0322
IQGAP1	11716766_a_at	1.4152	0.0314
KIAA1217	11731663_a_at	1.4149	0.0342
TNC	11716062_a_at	1.4138	0.0166
ZC3H11A	11746122_s_at	1.4131	0.0253
CASP1	11763186_at	1.4114	0.0282
AHR	11739680_a_at	1.4109	0.0265
EMILIN1	11729869_a_at	1.4077	0.0389
DCLK1	11728342_at	1.4054	0.038
PTBP2	11758115_s_at	1.4047	0.0229
COL11A1	11733707_x_at	1.402	0.0106
SETD2	11716194_a_at	1.3994	0.032
EID3	11727623_at	1.3992	0.041
FAM82A1	11749585_a_at	1.3983	0.0386
OSR2	11732663_x_at	1.3981	0.0341
PLAGL1	11734150_x_at	1.3976	0.0122
ITGAV	11716299_a_at	1.3972	0.0248
HIST2H2AC	11759258_at	1.397	0.0367
SSX2IP	11738142_a_at	1.3962	0.0205
LCTL	11742082_a_at	1.3947	0.0378
IFI16	11716795_s_at	1.394	0.0428
GRAMD3	11749240_a_at	1.3931	0.0327
CENPM	11727353_a_at	1.3921	0.0457
NOTCH2NL	11719212_a_at	1.392	0.0361
CDC27	11743401_x_at	1.3907	0.0314
TTC3	11715641_a_at	1.3901	0.0462
EIF4EBP2	11758645_s_at	1.3895	0.0477
MGC24103	11760556_at	1.3891	0.0494
AKR1C1	11719171_a_at	1.388	0.0412
KCTD12	11715951_s_at	1.3872	0.0313
PLA2G4A	11727754_a_at	1.3856	0.0372
CDK6	11723241_at	1.3849	0.0191
AKAP13	11722594_at	1.3843	0.0295
EHBP1	11740039_a_at	1.3821	0.0396
HS2ST1	11729070_a_at	1.382	0.0409
PRRX1	11737200_a_at	1.3813	0.0394
C5orf36	11740778_x_at	1.3723	0.0458
HTRA3	11721390_at	1.3723	0.0252
EDNRB	11758445_s_at	1.3713	0.0435
ZFP106	11716676_a_at	1.3708	0.0206
LOC100506032 /// NBPF1 /// NBPF10 /// NBPF11 /// NBPF14 /// NBPF15 /// NBPF16 /// NBPF8 /// NBPF9	11757932_x_at	1.3657	0.0485
NHLRC1	11735453_at	1.3648	0.0114
ACTG2	11748016_a_at	1.3628	0.0409
NID2	11721744_a_at	1.3586	0.0486
NCALD	11736718_a_at	1.3585	0.0188
BCAS1	11732337_x_at	1.3569	0.0325
LUZP6 /// MTPN	11715778_a_at	1.3447	0.0013
INSIG1	11716338_a_at	1.3343	0.0493
BIRC6	11742930_a_at	1.3327	0.041
PHLDB2	11737043_x_at	1.3234	0.05
MBTD1	11746969_a_at	1.3224	0.0295
ADAM19	11723188_s_at	1.3157	0.0218
PDXDC1	11759855_s_at	1.3117	0.025
ATP2A2	11754301_a_at	1.3048	0.0221
EPM2AIP1	11725355_at	1.3045	0.0298
DSCR8	11744773_a_at	1.2831	0.0174
CCDC102B	11738200_a_at	1.2812	0.0248
C13orf18	11755405_a_at	1.2692	0.0486
ZNF396	11761126_at	1.2687	0.028
OXR1	11739771_a_at	1.2639	0.0091
FABP3	11742981_a_at	1.2483	0.032
SCD	11715562_x_at	1.2482	0.0323
HSPB3	11726087_at	1.2463	7.55966

## Sheet: PAA-CAA
Gene symbol	AffyID	FC	FDR
DACT1	11735385_s_at	-4.58295	0
PSAT1	11756182_s_at	-4.22119	0
CBS	11744286_s_at	-3.39328	0
ASNS	11748793_a_at	-3.35345	0
PPAPDC1A	11728520_a_at	-3.28192	0
GPC4	11727403_at	-3.19285	0
SLC38A4	11725512_a_at	-3.15457	0
CXCR7	11752501_a_at	-2.94551	0
PHGDH	11728203_a_at	-2.91886	0
COL11A1	11725765_a_at	-2.90107	0
C1QTNF3	11734565_s_at	-2.89268	0
PCK2	11719089_a_at	-2.86287	0
COL10A1	11735219_at	-2.85307	0
NFIB	11717219_s_at	-2.81532	0
KCNE4	11730357_at	-2.68745	0
SEL1L3	11753915_a_at	-2.6738	0
RPS4Y1	11716411_x_at	-2.65252	0.0042
MGP	11716203_a_at	-2.65182	0
OGN	11736191_s_at	-2.59875	0.0043
C1QTNF5	11735346_s_at	-2.55037	0
RDH10	11758544_s_at	-2.45942	0
IQCA1	11729908_a_at	-2.4564	0
KCTD15	11758536_s_at	-2.42895	0.0053
MYH2	11752274_a_at	-2.405	0.0117
MOCOS	11727675_at	-2.39808	0.0002
STAT4	11733215_a_at	-2.38607	0.0009
HOXD10	11730130_at	-2.37699	0.0078
ST6GAL2	11724383_at	-2.3753	0.0012
MFAP3L	11726527_s_at	-2.34687	0.0017
TGFB3	11727296_s_at	-2.25836	0.0012
GXYLT2	11731126_at	-2.25632	0.0079
PI16	11723456_x_at	-2.23714	0.0018
TPD52L1	11720704_s_at	-2.23115	0.0017
NKD2	11735421_a_at	-2.21631	0.0016
C11orf96	11719899_at	-2.21092	0.0009
DDX3Y	11724075_a_at	-2.18627	0.0209
CLU	11756547_a_at	-2.18293	0.0023
KIF26B	11755841_a_at	-2.16263	0.0079
TRIB3	11719811_a_at	-2.15796	0.0015
ODZ3	11727984_at	-2.15703	0.0078
PRICKLE1	11727151_a_at	-2.13538	0.0111
CDH18	11734271_a_at	-2.12857	0.0078
TRIL	11757583_s_at	-2.12359	0.0053
BCAT1	11720566_at	-2.1164	0.0015
MOBKL2B	11725168_s_at	-2.10659	0.0043
LRRC32	11721995_a_at	-2.08986	0.0018
PTHLH	11731897_a_at	-2.07082	0.0074
LXN	11717465_s_at	-2.07039	0.016
BCL11B	11733620_a_at	-2.05677	0.007
DEPDC6	11724763_s_at	-2.05423	0.0128
CRISPLD2	11723030_at	-2.05044	0.0101
RUNX1	11732933_a_at	-2.03417	0.0079
ATF5	11717800_a_at	-2.03211	0.0042
ASPN	11758636_s_at	-2.02388	0.0116
PPP1R3C	11717575_at	-1.9996	0.0087
DDIT4	11743972_a_at	-1.99561	0.0051
DOK5	11724534_a_at	-1.99322	0.0015
FZD4	11719012_at	-1.98295	0.0053
CSRP2	11729239_x_at	-1.97824	0.0279
TBX5	11732528_s_at	-1.97707	0.0102
MTHFD2	11745893_s_at	-1.96967	0.0052
HAPLN1	11725375_at	-1.96967	0.0212
GDF10	11729995_a_at	-1.93162	0.0129
MANBA	11758386_s_at	-1.93013	0.0014
C1QTNF6	11755769_a_at	-1.92827	0.0115
GDF6	11734363_at	-1.92753	0.0152
LMO3	11758051_s_at	-1.92678	0.0478
PMEPA1	11716151_a_at	-1.92604	0.0255
EPHX2	11754640_a_at	-1.91902	0.013
ARHGAP28	11723981_s_at	-1.91571	0.0464
ENPEP	11758509_s_at	-1.91461	0.0233
NUAK1	11739973_s_at	-1.91351	0.0102
GAS7	11725364_x_at	-1.90949	0.0069
INHBA	11746931_a_at	-1.90585	0.0133
TRIB2	11716941_at	-1.90476	0.0141
ZNF436	11743686_a_at	-1.89573	0.0122
TSC22D3	11717829_s_at	-1.89107	0.009
SOX9	11758216_s_at	-1.88501	0.0127
AGT	11730726_s_at	-1.87793	0.0129
FMO1	11754496_x_at	-1.87547	0.0053
EGFL6	11716532_a_at	-1.87301	0.0143
CILP2	11726182_at	-1.86532	0.0177
MN1	11725173_at	-1.85598	0.008
PCSK9	11723499_a_at	-1.85322	0.0133
B3GALT2	11729250_at	-1.84026	0.0219
ABCA8	11721557_a_at	-1.8379	0.0117
HMCN1	11755071_a_at	-1.83486	0.0448
DPT	11744168_at	-1.83385	0.0134
SLC3A2	11746697_a_at	-1.83385	0.0132
IFIT2	11721874_at	-1.82582	0.008
REPS2	11722348_a_at	-1.82216	0.0111
B3GALTL	11728908_at	-1.82116	0.007
EFNB3	11722318_a_at	-1.81094	0.0205
FGD6	11723186_at	-1.80343	0.0129
NUPR1	11716937_a_at	-1.79727	0.0101
EPHA4	11723441_a_at	-1.79437	0.0142
WARS	11726287_a_at	-1.78285	0.0112
ACTG2	11748016_a_at	-1.77968	0.01
FKBP5	11739567_s_at	-1.77841	0.0125
SFRP2	11720607_a_at	-1.76866	0.0043
CTH	11742278_a_at	-1.76616	0.0167
P4HA3	11725272_a_at	-1.76585	0.0425
JHDM1D	11755223_a_at	-1.76523	0.0131
NCRNA00292	11758579_s_at	-1.76305	0.0191
LRRC15	11723164_a_at	-1.75963	0.045
TPM2	11715273_at	-1.75871	0.0168
SORBS2	11735570_a_at	-1.75346	0.0131
ARL4A	11733139_a_at	-1.75009	0.0224
LRRC17	11726291_a_at	-1.74978	0.0044
GSTT1	11719246_a_at	-1.74703	0.0191
ZNF469	11729040_at	-1.74186	0.0223
SEMA3D	11731195_at	-1.73943	0.0344
CARD6	11728617_at	-1.7334	0.0139
BGN	11721245_s_at	-1.7316	0.0416
AXIN2	11718452_at	-1.72861	0.0115
AGTR1	11725176_s_at	-1.72801	0.0126
DHRS3	11716835_a_at	-1.72236	0.0078
COL14A1	11757921_s_at	-1.72028	0.027
SYT14	11740732_a_at	-1.7188	0.0354
RASL11B	11744230_s_at	-1.71733	0.0345
C11orf75	11723561_x_at	-1.71556	0.0287
ZNF880	11732579_s_at	-1.71409	0.0221
MARS	11744024_a_at	-1.71262	0.021
FOXF1	11729385_at	-1.71145	0.0348
KCND2	11736529_at	-1.70882	0.0134
EIF4EBP1	11718283_a_at	-1.70503	0.0146
TPM1	11738893_s_at	-1.70242	0.0332
FNDC1	11723174_a_at	-1.69808	0.0333
HSD17B14	11757575_x_at	-1.69549	0.0191
FKBP1A	11729707_at	-1.6952	0.0143
MAB21L1	11743770_at	-1.69119	0.0018
TMEM30B	11755726_a_at	-1.68976	0.0224
LEPREL1	11743417_a_at	-1.68805	0.022
GRHL1	11727556_a_at	-1.68606	0.0341
MSX1	11736609_at	-1.68124	0.0176
WISP1	11731822_at	-1.67616	0.0413
NFATC1	11756259_s_at	-1.67252	0.0204
UCHL1	11757915_s_at	-1.66973	0.0286
ADAM12	11722200_s_at	-1.65782	0.0391
SH3PXD2A	11717126_at	-1.65645	0.0418
CLK1	11716325_a_at	-1.65508	0.0205
SCRG1	11757502_x_at	-1.65399	0.0077
MX1	11716167_a_at	-1.65235	0.0391
ISLR	11716549_s_at	-1.65071	0.0425
MAFB	11721629_a_at	-1.64853	0.0209
IFIT1	11756820_a_at	-1.64826	0.0332
ID3	11754008_x_at	-1.64636	0.0406
MKNK2	11739147_a_at	-1.63854	0.0233
GLT25D2	11724167_s_at	-1.63639	0.0283
TFPT	11719846_a_at	-1.63613	0.0175
CLIC2	11734784_a_at	-1.63159	0.0426
IGF2BP1	11727103_at	-1.62813	0.0277
CELF2	11733262_a_at	-1.62734	0.0334
RHOBTB3	11716455_at	-1.62575	0.0344
BHLHE40	11725983_at	-1.61812	0.0459
COBLL1	11743352_s_at	-1.61655	0.0459
SHMT2	11750992_x_at	-1.61421	0.04
GSTO2	11746499_a_at	-1.61031	0.0294
SLC38A1	11717103_s_at	-1.60901	0.0284
ADAM19	11723188_s_at	-1.60256	0.0412
ID4	11721688_at	-1.60205	0.0333
IFI44L	11723235_a_at	-1.59974	0.0333
PLEKHH2	11720452_at	-1.59872	0.0288
CGREF1	11728528_a_at	-1.59566	0.024
SEPT6	11721626_a_at	-1.58932	0.0415
FABP3	11742981_a_at	-1.58053	0.0429
RARRES3	11719692_a_at	-1.58003	0.0429
GSTM1	11751554_s_at	-1.56568	0.0294
KCNJ8	11725806_at	-1.5647	0.0424
SLC1A5	11716866_x_at	-1.56397	0.0335
CLCN5	11719164_a_at	-1.56177	0.0334
SLC7A11	11721876_s_at	-1.55958	0.03
GLIS3	11739882_a_at	-1.5586	0.0452
PTGS2	11724037_at	-1.554	0.0292
MT1JP	11753736_s_at	-1.55352	0.0461
ZFP36L1	11716115_s_at	-1.54655	0.0453
YARS	11758118_s_at	-1.5444	0.044
RARRES2	11754862_a_at	-1.5387	0.0204
BCL11A	11732339_at	-1.53799	0.0221
MYO1E	11718068_at	-1.53468	0.0492
PTGER3	11730484_at	-1.53257	0.0415
SPON1	11724503_at	-1.51999	0.0404
IGSF10	11728030_a_at	-1.51791	0.0491
SARS	11744142_a_at	-1.50015	0.049
PCDH7	11724983_at	-1.44238	0.0312
NPNT	11718435_a_at	-1.44134	0.0485
PABPC4L	11734404_s_at	-1.43328	0.0494
NR4A3	11729058_s_at	-1.42878	0.0421
PEAR1	11732925_s_at	-1.31354	0.0242
C10orf116	11717305_a_at	5.9052	0
CLEC3B	11727867_a_at	5.798	0
EPDR1	11739072_at	5.4292	0
APCDD1	11757736_s_at	5.3068	0
EMB	11722888_s_at	4.939	0
NTN4	11717803_a_at	4.4906	0
ADH1B	11746898_x_at	4.4126	0
INHBB	11728829_at	4.3401	0
TNFRSF11B	11730319_at	4.2637	0
SAMD5	11726174_at	4.1905	0
TNFRSF19	11721736_s_at	4.0726	0
HSPB7	11754949_s_at	4.037	0
SIPA1L2	11744184_a_at	3.9989	0
ROBO2	11729987_s_at	3.9882	0
PSPH	11763252_x_at	3.8728	0
MYBL1	11725861_a_at	3.8176	0
PTGDS	11756587_a_at	3.6438	0
SLC7A14	11743938_at	3.582	0.0002
GRP	11756874_a_at	3.5758	0
ADH1A	11722994_s_at	3.5592	0
LY6K	11739798_a_at	3.5379	0
STC1	11724196_s_at	3.5043	0
PSG4	11715206_x_at	3.4459	0
MEOX2	11723752_s_at	3.4012	0
MEST	11717196_a_at	3.3758	0.0004
S1PR3	11725905_a_at	3.3185	0
PENK	11720425_a_at	3.3171	0.0002
TMEM158	11724275_s_at	3.3125	0
TFPI	11723951_a_at	3.2823	0
LPPR4	11721183_at	3.271	0
CLEC2B	11721303_at	3.2537	0
TNFRSF21	11753764_s_at	3.1464	0
CTSC	11731465_a_at	3.116	0
OSR2	11723577_x_at	3.0464	0.0002
AQP1	11715942_a_at	3.0196	0.0004
FAM65B	11724381_at	2.9856	0.0007
C7orf58	11726487_at	2.9749	0.0004
HLA-DPA1	11715583_s_at	2.9477	0
ST6GALNAC5	11727448_x_at	2.9332	0.0002
CLEC2A	11751834_a_at	2.8751	0.0005
ANLN	11724465_a_at	2.8277	0.0002
RRM2	11758219_x_at	2.8146	0.0002
PPL	11722430_at	2.8051	0.0009
CDH13	11752561_a_at	2.7769	0.0007
NOV	11723033_at	2.7767	0.0009
EFNB2	11720404_at	2.7762	0.0007
C3orf72	11732921_at	2.7608	0.0005
GINS1	11728863_at	2.7421	0.0004
PSG5	11727592_x_at	2.7222	0.0004
SEMA3A	11730391_at	2.6983	0.0009
ZNF367	11728101_at	2.692	0.0008
KRTAP1-5	11729095_at	2.6684	0.0011
HLA-F	11718230_a_at	2.6567	0.0008
INPP4B	11739840_a_at	2.6465	0.0005
DNAJC6	11745300_a_at	2.6335	0.0004
SPC25	11723998_at	2.6116	0.0007
HSPB3	11726087_at	2.6033	0.0009
SYNPO2	11731554_a_at	2.5992	0.0008
PRELP	11753893_a_at	2.598	0.0003
CCNE2	11728300_at	2.5858	0.0007
SERPINB2	11716631_s_at	2.576	0.001
TOM1L1	11719589_a_at	2.5627	0.0012
CST6	11724322_a_at	2.5549	0.0009
HOXC10	11723324_at	2.5518	0.0024
TFPI2	11757022_x_at	2.5509	0.001
EZR	11742990_x_at	2.5411	0.001
APOBEC3A	11732901_a_at	2.5341	0.0019
CEP55	11720247_a_at	2.5256	0.0009
TIMP3	11715437_at	2.5166	0.0007
TJP2	11716742_a_at	2.515	0.0012
NT5E	11719174_a_at	2.5125	0.0012
FBXL2	11755039_s_at	2.5046	0.0012
PLCB4	11756635_a_at	2.4878	0.001
DUSP1	11752993_a_at	2.4761	0.0008
APOBEC3B	11732902_x_at	2.4755	0.0021
C13orf33	11736363_s_at	2.4223	0.0024
FAM134B	11753179_s_at	2.4191	0.001
FAM111B	11739932_a_at	2.4159	0.0013
XIST	11757733_s_at	2.4143	0.0045
TIPARP	11755700_a_at	2.4133	0.0012
ITGA6	11739860_a_at	2.4002	0.0024
GCNT1	11735271_a_at	2.3762	0.0015
PODXL	11715763_a_at	2.3605	0.0015
CCDC102B	11738200_a_at	2.3528	0.0024
PBK	11723950_a_at	2.3453	0.0018
TYMS	11751805_a_at	2.3439	0.0021
DBC1	11747118_a_at	2.3371	0.0033
PSG1	11738879_s_at	2.3243	0.0033
VIT	11727622_a_at	2.3208	0.0045
RAB38	11757999_s_at	2.3132	0.0029
GALNTL2	11726079_x_at	2.3048	0.003
SHCBP1	11728403_at	2.2932	0.002
CADM1	11728806_a_at	2.2914	0.0039
OIP5	11727543_at	2.2824	0.0021
NEURL1B	11718464_s_at	2.2759	0.0016
BNC1	11751918_a_at	2.2634	0.0034
SLC6A6	11721993_at	2.2566	0.0048
DAPK1	11720146_a_at	2.2554	0.0045
SDPR	11725695_s_at	2.2482	0.0031
SLC22A4	11724454_at	2.2371	0.001
CENPA	11723565_a_at	2.2354	0.003
CENPF	11743295_a_at	2.231	0.0033
TCF19	11728749_a_at	2.2294	0.0019
CNTN4	11729021_a_at	2.2263	0.0077
CASC5	11741225_a_at	2.2241	0.0027
HSPA2	11724723_a_at	2.2185	0.0034
FAM83D	11730264_a_at	2.2162	0.0031
CDC6	11743065_at	2.2145	0.0031
FAM20A	11744893_a_at	2.2053	0.0075
UBASH3B	11727816_at	2.1952	0.0033
CA12	11720947_x_at	2.1949	0.0057
NPTX1	11755325_s_at	2.1902	0.0037
TMSB15A	11720240_at	2.1881	0.0023
UBE2C	11733695_a_at	2.1847	0.0033
MCM4	11759510_x_at	2.1817	0.0032
SRGN	11742710_a_at	2.1776	0.0077
GLIPR1	11721839_at	2.1692	0.0079
HLA-DPB1	11758369_x_at	2.1603	0.0046
NCEH1	11724836_at	2.1503	0.0033
MKI67	11721143_a_at	2.1491	0.0039
NTF3	11758373_s_at	2.1481	0.0039
DEPDC1	11730111_a_at	2.1447	0.0045
C8orf34	11729088_at	2.1446	0.0046
MAP7	11757918_s_at	2.1387	0.0068
TBX1	11732881_s_at	2.1385	0.0031
FAM64A	11723747_a_at	2.1375	0.0046
PRUNE2	11718241_a_at	2.137	0.0042
DTNA	11734808_s_at	2.1344	0.0045
NEK2	11722252_x_at	2.1281	0.0045
SEMA5A	11719518_at	2.1277	0.0042
FAM46C	11739338_at	2.1277	0.0096
DKK2	11728089_a_at	2.1216	0.0034
GDF5	11735374_a_at	2.1183	0.0045
MLF1IP	11744789_a_at	2.114	0.0047
FOXL2	11728593_at	2.1074	0.0045
CPNE8	11739823_a_at	2.1061	0.0039
TTK	11723435_s_at	2.0912	0.0068
GALNT14	11718369_a_at	2.0875	0.0162
SMC2	11745424_a_at	2.0813	0.0045
DLGAP5	11722367_a_at	2.0731	0.0067
CLEC12A	11753241_s_at	2.0727	0.0071
SPC24	11759151_at	2.0679	0.0048
LOC404266	11759610_at	2.0665	0.0082
C10orf54	11718002_at	2.0592	0.0046
EHD3	11719596_at	2.0515	0.0074
MAD2L1	11720185_a_at	2.0483	0.0052
NIPAL3	11725627_at	2.0474	0.0066
CCND1	11751330_a_at	2.047	0.0065
SGOL2	11753254_a_at	2.0448	0.0052
DSG2	11725524_s_at	2.0428	0.0105
CARD16	11736761_at	2.0427	0.0082
STEAP4	11720007_a_at	2.0404	0.0038
GLDN	11731172_s_at	2.0402	0.0102
ANXA3	11724283_a_at	2.0366	0.0034
CDC45	11719699_a_at	2.0337	0.0052
CKAP2L	11726724_a_at	2.0253	0.0068
SFRP1	11723246_s_at	2.0217	0.0076
TRPV2	11755902_a_at	2.0196	0.0096
ALDH3B1	11731722_a_at	2.0182	0.0069
NCAPH	11721854_a_at	2.0143	0.0048
KIF23	11721932_a_at	2.0122	0.0069
NDC80	11744274_at	2.0116	0.0101
GINS4	11736596_s_at	2.006	0.0062
AURKA	11751206_s_at	2.0052	0.0068
RFC3	11718404_at	2.001	0.0069
SPAG5	11720319_at	1.9994	0.0069
TOP2A	11720970_at	1.9979	0.0089
CAV1	11757013_x_at	1.9915	0.007
CDK1	11745843_a_at	1.9879	0.0075
HPCAL1	11724552_s_at	1.9877	0.0041
DTL	11758499_s_at	1.9853	0.0071
WNT5B	11719441_a_at	1.9838	0.0074
NOTCH2	11752984_s_at	1.9828	0.0163
DKK3	11738985_x_at	1.9802	0.0042
ESCO2	11727968_at	1.9779	0.0096
ITGA4	11746767_a_at	1.9778	0.0069
SLC4A4	11717820_a_at	1.9757	0.0068
KRT34	11729374_at	1.9734	0.0415
CDCA3	11719598_s_at	1.9722	0.0077
COMP	11750735_a_at	1.9696	0.0067
NEDD4L	11758571_s_at	1.9695	0.0092
STMN2	11717826_x_at	1.9688	0.0118
CADPS2	11754806_s_at	1.9679	0.0071
PSD3	11719028_a_at	1.9628	0.0047
CDCA7	11758478_s_at	1.9626	0.0074
PDCD1LG2	11736813_at	1.9561	0.0046
KLF4	11719633_a_at	1.9556	0.013
OLA1	11730188_s_at	1.9545	0.007
ZWINT	11756626_s_at	1.9542	0.008
LRRC2	11741749_x_at	1.9521	0.0077
ASPM	11748713_a_at	1.9481	0.01
BIRC5	11754109_s_at	1.9461	0.0105
HOXC11	11734267_a_at	1.9457	0.0104
ITGA3	11756790_a_at	1.9446	0.0092
CD44	11715915_a_at	1.9414	0.0105
XRCC6BP1	11743376_at	1.9366	0.0076
PHLDA1	11721307_at	1.9351	0.0045
RGMB	11721793_at	1.928	0.0104
ZWILCH	11754687_a_at	1.9232	0.0067
IL7	11747034_a_at	1.9203	0.0118
CENPM	11727353_a_at	1.9168	0.0105
CCNA2	11722572_at	1.9131	0.0122
PIK3R1	11733018_s_at	1.9126	0.0069
HMMR	11758089_s_at	1.9126	0.0105
FAM155A	11730442_s_at	1.9106	0.0458
NUSAP1	11742735_a_at	1.9073	0.0118
ARHGAP29	11723815_at	1.9073	0.0159
CKAP2	11723678_at	1.9035	0.0068
VEPH1	11753981_a_at	1.8989	0.0075
CDCA5	11718183_at	1.8988	0.0105
TRIP13	11731526_s_at	1.8961	0.0122
NUF2	11722442_a_at	1.896	0.0129
MFSD6	11744415_s_at	1.8948	0.0165
KRT19	11731500_a_at	1.8942	0.0102
ARRDC3	11718723_at	1.8908	0.0145
MMP1	11741897_a_at	1.8863	0.0096
SEPP1	11731433_a_at	1.886	0.0104
PM20D2	11758211_s_at	1.8793	0.0065
LNX1	11730251_x_at	1.8757	0.0109
MASTL	11723771_a_at	1.8741	0.0093
ABCC3	11748362_s_at	1.8731	0.0107
ATP2B4	11718083_a_at	1.8719	0.0113
MAF	11733087_a_at	1.8703	0.0295
GFRA1	11724132_at	1.8702	0.0141
SDK2	11729958_at	1.8672	0.0113
ITGA7	11718243_a_at	1.8672	0.0154
UHRF1	11723192_a_at	1.8631	0.0113
KIF15	11758371_s_at	1.8626	0.0162
NTNG1	11757603_a_at	1.8608	0.0265
TPX2	11750598_s_at	1.8606	0.014
HSPA1B	11729120_x_at	1.8535	0.0201
PRIM2	11725687_s_at	1.8524	0.012
ORC6	11727837_at	1.8489	0.014
OLFML2A	11720277_a_at	1.846	0.0141
C11orf87	11729897_at	1.8425	0.0104
RAD51AP1	11732191_s_at	1.8422	0.0206
CDCA2	11755466_a_at	1.8406	0.0141
FEN1	11751389_s_at	1.84	0.0141
CCDC152	11751479_a_at	1.8385	0.0137
IGFBP5	11728654_x_at	1.8366	0.0015
ATP8B4	11730121_a_at	1.8335	0.0167
CENPK	11743530_a_at	1.8302	0.0239
TMEM35	11722557_at	1.8296	0.0196
MYCBP	11727802_s_at	1.8253	0.0206
KIAA1644	11758406_s_at	1.8248	0.0134
AOX1	11756912_a_at	1.824	0.0124
CDKN3	11745464_x_at	1.8237	0.0176
RXFP1	11761923_a_at	1.8227	0.0265
CLDN11	11747704_a_at	1.8221	0.0381
EVI2A	11733841_a_at	1.8171	0.0154
FBXO5	11724963_s_at	1.813	0.0204
ABCA6	11739904_a_at	1.8125	0.025
EIF1AX	11716778_s_at	1.8122	0.0132
SCIN	11731607_a_at	1.812	0.0448
GRIA3	11725753_a_at	1.8094	0.022
JUN	11718397_s_at	1.8092	0.0132
LMNB1	11750442_s_at	1.8091	0.0196
TACSTD2	11717301_at	1.8073	0.0164
PHLDA2	11744005_at	1.805	0.0121
SAMD9L	11724117_x_at	1.8046	0.0247
ETS2	11758370_s_at	1.8041	0.0252
BUB1B	11720647_a_at	1.8021	0.0213
CCNB1	11723939_a_at	1.8019	0.0197
BHMT2	11746667_a_at	1.7993	0.0226
C1D	11748703_a_at	1.7966	0.0165
HELLS	11758572_s_at	1.7951	0.0204
FAM54A	11755624_a_at	1.7929	0.014
PRC1	11716358_s_at	1.7923	0.0207
DIO2	11721580_a_at	1.7897	0.0069
GPD2	11739427_a_at	1.7864	0.0176
NCAPG2	11756784_x_at	1.7845	0.0213
GAS2L3	11734537_a_at	1.7823	0.0137
SOD2	11748910_a_at	1.7804	0.0386
GINS2	11743513_a_at	1.778	0.0251
CHST2	11718908_s_at	1.7741	0.0314
FANCI	11730875_a_at	1.7716	0.0264
CDC20	11717163_s_at	1.7715	0.022
NOTCH2NL	11719212_a_at	1.7696	0.027
C9orf140	11755300_x_at	1.7696	0.0289
CHAC2	11728808_at	1.7663	0.0252
CALR	11715374_a_at	1.7661	0.0196
AIM1	11719247_at	1.7645	0.0187
CKB	11753004_a_at	1.7637	0.0162
MBNL1	11744794_a_at	1.7636	0.025
STS	11724829_at	1.7632	0.0362
LYN	11718085_s_at	1.7617	0.0164
KIF2C	11745868_a_at	1.7575	0.0226
IGFBP6	11717909_at	1.7566	0.0156
KIF14	11731888_a_at	1.7566	0.0223
DIRAS3	11725713_a_at	1.7507	0.0342
TLE1	11740414_a_at	1.7498	0.0231
STEAP3	11722678_a_at	1.7496	0.0223
C21orf7	11747047_a_at	1.7496	0.0299
RFC5	11741284_a_at	1.7486	0.0265
PPARGC1A	11723404_at	1.7485	0.0294
DRAM1	11719155_a_at	1.7444	0.0318
LRRC8C	11723591_at	1.7406	0.0208
LEPR	11726871_s_at	1.7383	0.0263
SERPINE2	11741678_a_at	1.7345	0.0183
CDC25B	11718005_a_at	1.7337	0.0276
CD47	11743347_a_at	1.7336	0.0154
SKA3	11729310_a_at	1.7328	0.0263
C15orf23	11743373_a_at	1.7304	0.0241
PMAIP1	11724509_a_at	1.7292	0.0289
PCP4	11722232_a_at	1.7286	0.0168
HAS2	11740312_at	1.7279	0.0383
KIF20A	11723010_a_at	1.7276	0.0325
RAB3B	11736461_at	1.7275	0.0196
SERP2	11738270_a_at	1.7264	0.0355
TMEM123	11715735_a_at	1.726	0.0196
B4GALT6	11731841_a_at	1.7255	0.0265
MCM8	11734972_x_at	1.7254	0.0253
DIAPH3	11752028_a_at	1.7246	0.0313
TMTC1	11718651_at	1.7243	0.018
STMN1	11753705_x_at	1.7237	0.0265
LRRN4CL	11733167_at	1.7224	0.0296
EMP1	11758781_at	1.7214	0.0251
HSPA1A	11729119_a_at	1.7198	0.0319
BMP2K	11726120_a_at	1.719	0.0207
DHFR	11718998_x_at	1.7184	0.0313
FBXO27	11734106_x_at	1.7179	0.0213
SLC8A1	11735152_a_at	1.7176	0.0354
KIAA0494	11716347_a_at	1.717	0.0187
CRIP2	11747671_x_at	1.7153	0.0196
SLC16A4	11749023_a_at	1.7136	0.0298
PSMC3IP	11734865_a_at	1.7132	0.0378
EPB41L1	11721168_a_at	1.7125	0.0203
SVIL	11728499_x_at	1.7124	0.0267
KCNMA1	11750376_a_at	1.7124	0.0292
DENND2A	11721756_a_at	1.7123	0.0198
OAS3	11723699_s_at	1.712	0.0372
PPFIBP1	11729051_a_at	1.7105	0.0432
PTTG1	11717521_x_at	1.7093	0.03
AHR	11739680_a_at	1.7086	0.0245
MMP3	11723635_s_at	1.7047	0.0415
MMD	11718936_s_at	1.7046	0.0187
PRDM8	11725280_a_at	1.7031	0.0204
TIMELESS	11719123_a_at	1.7013	0.0341
KIF18A	11727458_at	1.6999	0.0405
CENPN	11727973_a_at	1.698	0.0266
TK1	11718128_x_at	1.6977	0.0339
PVRL3	11727125_a_at	1.6967	0.0272
CD82	11742129_x_at	1.694	0.03
CTNNAL1	11756160_x_at	1.6927	0.0289
RUNX3	11740486_a_at	1.6922	0.0388
CHAF1A	11727880_a_at	1.6919	0.0329
PCDH10	11731432_at	1.6915	0.0052
PTN	11723961_s_at	1.6914	0.0082
GTF2F2	11753511_a_at	1.6902	0.0185
ACAD11	11752117_x_at	1.6892	0.0325
CRIP1	11721704_a_at	1.6889	0.0359
SKA1	11722069_a_at	1.6867	0.0322
CCND2	11719198_s_at	1.6862	0.027
GSTCD	11728569_at	1.685	0.0276
GINS3	11739763_a_at	1.6844	0.0295
MAP2K6	11724606_a_at	1.6826	0.03
GALNT6	11739667_at	1.6794	0.0339
E2F8	11728958_x_at	1.6783	0.0481
DNAJC9	11763164_at	1.6759	0.0315
RNASEH2A	11757017_x_at	1.6757	0.0367
NCAPG	11722826_a_at	1.6756	0.0371
NBL1	11715746_a_at	1.6748	0.0351
BMP2	11743497_at	1.6742	0.0247
NETO2	11722864_at	1.6719	0.03
TMEM47	11721757_at	1.6702	0.0398
KIAA1524	11737795_a_at	1.6692	0.0399
POLE2	11744519_a_at	1.6684	0.0435
ARHGAP22	11715167_at	1.6662	0.022
ABI3BP	11748945_a_at	1.666	0.0294
ZDHHC14	11734583_a_at	1.6648	0.032
DSEL	11730622_at	1.6644	0.0289
ASS1	11757278_x_at	1.6634	0.0387
CCRL1	11737108_a_at	1.6604	0.0212
DCBLD2	11755200_a_at	1.6578	0.0266
BUB1	11747230_a_at	1.6573	0.0461
AMD1	11747828_x_at	1.6557	0.0262
DNALI1	11719321_a_at	1.654	0.0455
C14orf106	11731007_a_at	1.6531	0.0324
C16orf75	11744297_a_at	1.6514	0.0356
CEP70	11720098_a_at	1.6497	0.0258
CAV2	11725965_a_at	1.6496	0.0482
FGF5	11736687_a_at	1.6491	0.0415
GTSE1	11759176_at	1.6485	0.0472
FAM111A	11719313_a_at	1.6479	0.0296
RNF182	11737774_a_at	1.6478	0.0423
ABAT	11736387_a_at	1.6413	0.0352
PHF19	11722880_a_at	1.6403	0.0499
FGF2	11725040_at	1.6376	0.0416
DCN	11763262_at	1.6351	0.0298
MANEA	11725565_at	1.6318	0.0251
NCKAP5	11731136_a_at	1.6309	0.0282
APITD1	11743796_a_at	1.6309	0.0384
SH2B3	11717409_at	1.6303	0.0313
HSPB8	11715776_a_at	1.6296	0.0437
ARG2	11728695_at	1.6291	0.0263
FHL1	11753598_a_at	1.6291	0.0356
C21orf45	11724506_s_at	1.627	0.0408
DUSP6	11744435_a_at	1.6262	0.0402
CHST7	11715251_at	1.6255	0.0316
BBX	11720656_a_at	1.6238	0.0317
ADAMTS6	11728612_at	1.6223	0.047
TFAP2C	11726192_at	1.6198	0.0437
MYLK	11721837_a_at	1.6192	0.0434
CKS1B	11716092_x_at	1.6122	0.0459
PHACTR1	11742866_a_at	1.6119	0.0334
CEP78	11725011_a_at	1.6119	0.0381
SMAGP	11719864_a_at	1.6119	0.0435
ITIH5	11734676_at	1.6113	0.0404
STC2	11721437_a_at	1.5997	0.046
SSTR1	11728041_at	1.5993	0.0299
SH3BP2	11724312_a_at	1.5955	0.0406
PSEN2	11723672_a_at	1.5926	0.0394
SAP30	11727476_s_at	1.5833	0.0453
ASAP2	11725923_s_at	1.5831	0.036
MCM3	11748174_x_at	1.5831	0.0494
SYNM	11755757_a_at	1.5815	0.047
MLPH	11719265_a_at	1.5794	0.0312
ATP2B1	11743864_a_at	1.5773	0.0409
SCOC	11745739_a_at	1.5722	0.0467
TSHZ2	11758468_s_at	1.5709	0.0435
SOCS2	11751612_a_at	1.5659	0.0355
C9orf5	11718677_at	1.5646	0.0447
FAM19A2	11730300_a_at	1.5618	0.0245
CHPT1	11722070_a_at	1.5587	0.0445
GRIA1	11739499_a_at	1.5544	0.0233
PSMD5	11739153_a_at	1.5482	0.0468
GSTT2	11722903_s_at	1.5439	0.0295
PDE4DIP	11748916_x_at	1.5388	0.0407
ZNF321	11749609_s_at	1.5367	0.0499
CSGALNACT1	11732526_s_at	1.5342	0.0414
CD9	11763855_x_at	1.5257	0.0288
KCNK1	11747096_a_at	1.525	0.0419
PLK2	11755161_s_at	1.5183	0.0416
PTGIS	11724441_x_at	1.4925	0.025
VCAM1	11757425_s_at	1.4415	0.0289
WISP2	11735059_a_at	1.4368	0.0325
ACTC1	11720489_a_at	1.4182	0.0416
IGF2	11739787_a_at	1.4179	0.0105
FLRT3	11739518_a_at	1.4179	0.0118
MGC87042	11759698_at	1.3618	0.0494
TGM2	11718399_s_at	1.1973	0.0383
THBS4	11721212_a_at	1.1753	0.0241

## Sheet: CAA-C
Gene symbol	AffyID	FC	FDR
IL8	11718841_s_at	-5.21921	0
INHBE	11736262_at	-5.18941	0
CXCL1	11719366_s_at	-5.13875	0
SCRG1	11718605_a_at	-5.06073	0
MEST	11717196_a_at	-4.54339	0
CXCL2	11744127_at	-4.35161	0
CXCL6	11730801_at	-4.29	0
GPR1	11732319_a_at	-3.5137	0
TPD52L1	11720704_s_at	-3.37952	0
TGM2	11718399_s_at	-3.3389	0
SYBU	11721430_a_at	-3.29272	0
SEL1L3	11753915_a_at	-3.18573	0
SLC7A11	11721875_at	-3.1027	0
TNFRSF11B	11730319_at	-3.0525	0
CCL2	11716384_at	-3.04878	0
ID4	11721687_at	-3.03582	0
TRIB3	11719811_a_at	-2.94985	0
TCEA1	11734918_s_at	-2.94291	0
SULF1	11737874_a_at	-2.88101	0
CDH13	11752561_a_at	-2.87936	0
WARS	11747666_a_at	-2.83607	0
DAB1	11759050_at	-2.81294	0
C9orf150	11720515_s_at	-2.76014	0
PTX3	11718157_s_at	-2.72851	0
FAM129A	11755895_a_at	-2.70636	0
DDIT4	11743972_a_at	-2.70051	0
KRTAP1-5	11729095_at	-2.62467	0
PSAT1	11741479_a_at	-2.61506	0
VEGFA	11725372_x_at	-2.58532	0
SERPINE1	11746856_a_at	-2.55297	0
TNFAIP6	11743636_at	-2.48633	0
HAS2	11740311_at	-2.48201	0
ATF5	11717802_s_at	-2.46305	0
CXCL3	11728477_at	-2.46245	0.0055
ABCC3	11748362_s_at	-2.40327	0
ITIH5	11734676_at	-2.38322	0
FGF2	11725039_at	-2.35073	0
SLC22A4	11724454_at	-2.2941	0
ID1	11753661_a_at	-2.26142	0
TNFRSF21	11732111_a_at	-2.25073	0
SLC2A1	11756238_s_at	-2.24719	0
MTHFD2	11745870_a_at	-2.23864	0
CDH2	11726615_a_at	-2.23764	0
RCAN1	11743732_a_at	-2.22717	0
NCRNA00275	11744365_a_at	-2.2237	0
IL6	11746463_a_at	-2.21779	0
CSTA	11719480_a_at	-2.19877	0
BNC1	11735400_a_at	-2.17723	0
TIMP3	11715435_s_at	-2.16779	0
ABCA8	11721557_a_at	-2.1631	0
AK4	11731833_a_at	-2.1561	0
COL6A1	11715406_a_at	-2.13904	0
CCPG1	11723007_a_at	-2.13721	0
LAMP3	11725429_at	-2.1363	0
CXCL5	11728716_x_at	-2.12044	0.0016
DHRS3	11716835_a_at	-2.10571	0
SIPA1L2	11744184_a_at	-2.09118	0
CDH11	11753109_a_at	-2.08507	0
OBFC2A	11726725_a_at	-2.07297	0
CBS	11744287_x_at	-2.07125	0
C11orf87	11729897_at	-2.06825	0
SLC7A5	11739061_at	-2.0674	0.0002
KLF2	11758208_s_at	-2.06697	0
PTER	11736666_a_at	-2.06101	0
GDF15	11716663_a_at	-2.05888	0
CPA4	11729128_at	-2.05423	0
PMAIP1	11724509_a_at	-2.04332	0.0002
RDH10	11758544_s_at	-2.02675	0
IL20RB	11727589_a_at	-2.02552	0
CLGN	11749190_a_at	-2.02511	0.0006
CRIM1	11736229_a_at	-2.0247	0
FKBP9	11763622_a_at	-2.02143	0
TNFAIP3	11718939_s_at	-2.01369	0
PAWR	11731569_at	-2.01329	0
GULP1	11728307_x_at	-2.00562	0
ALDH2	11715627_x_at	-2.0012	0
S1PR1	11743816_s_at	-1.99084	0
SEL1L	11717203_at	-1.97511	0
G0S2	11744219_at	-1.97239	0
IGFBP5	11758196_s_at	-1.97122	0.0014
SGCG	11731114_a_at	-1.96618	0
MAMLD1	11755364_a_at	-1.96348	0
CADM1	11728805_a_at	-1.95542	0
CEBPG	11717694_a_at	-1.94856	0.0001
F3	11721290_a_at	-1.94553	0.0006
GRIA1	11739499_a_at	-1.93911	0.0001
KRT7	11715683_a_at	-1.93761	0
UGCG	11725385_at	-1.93611	0
SYNPO2	11721602_a_at	-1.9305	0.0001
HSPA5	11725933_at	-1.92938	0
ANKRD37	11721917_a_at	-1.91644	0
LOC652797	11752165_s_at	-1.91644	0
EFEMP1	11749564_a_at	-1.91571	0.0002
ASNS	11748793_a_at	-1.91314	0.0006
LYPD6B	11744596_a_at	-1.91278	0
ELL2	11736478_a_at	-1.90367	0
STK17A	11722656_s_at	-1.88786	0.0001
SSTR1	11728041_at	-1.88608	0.0002
ABCC9	11758382_s_at	-1.88359	0.0004
IGF2	11739787_a_at	-1.88253	0.0007
MT1F	11721877_s_at	-1.88218	0.0007
GDAP1	11739561_at	-1.87829	0
IVNS1ABP	11720759_s_at	-1.87512	0.0005
DKK1	11718141_at	-1.87126	0.0002
TNFRSF10D	11723310_at	-1.86393	0
KCNMA1	11750376_a_at	-1.86116	0.0002
DRAM1	11719154_a_at	-1.85529	0.0001
GATA6	11723838_at	-1.84672	0.0001
SLC25A37	11744559_a_at	-1.8457	0
AOX1	11756912_a_at	-1.84366	0
PTGS2	11724038_a_at	-1.8379	0.0015
STAT1	AFFX-HUMISGF3A/M97935_5_at	-1.83318	0
STC1	11724196_s_at	-1.82916	0.0018
EGR2	11722728_a_at	-1.82782	0.001
MYC	11745021_a_at	-1.82448	0.0009
SLC8A1	11735152_a_at	-1.82216	0.0003
CHAC1	11722407_a_at	-1.82083	0.0028
NRIP3	11746599_a_at	-1.81884	0.0003
MKNK2	11739147_a_at	-1.81785	0.0001
ALCAM	11716185_a_at	-1.81455	0.0011
BCAT1	11749895_a_at	-1.81225	0.0003
P4HA1	11730853_s_at	-1.80766	0.0001
GFRA1	11724132_at	-1.8044	0.0002
FZD8	11758064_s_at	-1.78253	0.0012
VEPH1	11763987_a_at	-1.78221	0.0003
PCK2	11719089_a_at	-1.78158	0.0006
NCRNA00219	11744369_s_at	-1.77999	0.0001
GPCPD1	11718503_a_at	-1.77999	0.0008
PAPPA	11744843_s_at	-1.77936	0.0004
KCNH1	11735587_a_at	-1.77904	0.0006
FAM19A5	11758614_s_at	-1.77809	0.0002
TFPI2	11757022_x_at	-1.77651	0.0041
CALR	11715374_a_at	-1.77274	0.001
SH3BGR	11721031_a_at	-1.76866	0.0007
HSPA9	11752595_a_at	-1.7646	0.0009
CCND2	11719198_s_at	-1.76429	0.0004
JUB	11726012_a_at	-1.7618	0.0003
RNF144B	11731082_at	-1.76056	0.0006
RPL37	11759113_at	-1.75901	0.001
FMN1	11759343_x_at	-1.75778	0.0012
MYCBP	11727803_at	-1.75469	0.0015
SLC22A15	11733955_at	-1.75316	0.0006
OXTR	11739389_at	-1.75039	0.0016
FHL2	11741106_x_at	-1.74429	0.0007
DUSP1	11752993_a_at	-1.74368	0.0003
DUSP6	11744435_a_at	-1.73943	0.0044
FAM167A	11723789_a_at	-1.73732	0.0009
TXNRD1	11715650_a_at	-1.7331	0.0003
GDF6	11734363_at	-1.72771	0.0014
SESN2	11718324_s_at	-1.72592	0.0035
NANOS1	11734135_at	-1.72533	0.0009
NEDD1	11741727_a_at	-1.72176	0.0006
GCH1	11721734_s_at	-1.72028	0.0036
FOXD1	11728563_at	-1.71762	0.0006
MT1G	11717386_s_at	-1.70969	0.0096
FHL1	11753598_a_at	-1.70911	0.001
FAM176A	11732078_a_at	-1.70474	0.0035
ASS1	11758627_s_at	-1.70271	0.0007
PLOD2	11748610_a_at	-1.69952	0.0015
MARCH4	11726193_at	-1.69722	0.0007
KCNE3	11720713_a_at	-1.69607	0.001
SRPR	11758316_s_at	-1.69405	0.0007
SFRP1	11723245_a_at	-1.69262	0.0028
NPAS2	11754812_a_at	-1.69233	0.0019
C6orf204	11747163_a_at	-1.68322	0.0027
SLC16A1	11748355_a_at	-1.67785	0.0012
EEF2	11715781_a_at	-1.67084	0.0007
CDK5RAP2	11724524_x_at	-1.66945	0.0015
PVR	11719177_x_at	-1.66196	0.001
FLJ36031	11739442_s_at	-1.66003	0.0039
PTGDS	11756587_a_at	-1.65975	0.0014
FOXC1	11753509_a_at	-1.65782	0.0018
LOXL2	11751288_a_at	-1.65673	0.0011
IL7R	11733187_a_at	-1.65317	0.0015
SLC3A2	11753435_x_at	-1.6518	0.0041
WSB1	11760501_a_at	-1.64853	0.0099
LOC285141	11744906_at	-1.64718	0.0055
LOC730755	11746283_s_at	-1.64366	0.001
ODC1	11752515_a_at	-1.64285	0.003
MOCOS	11727675_at	-1.64258	0.0017
ARHGDIA	11747512_s_at	-1.64258	0.0022
BDNF	11735902_a_at	-1.64258	0.0036
TMEM154	11758583_s_at	-1.64096	0.0063
NARS	11753216_a_at	-1.63586	0.0035
NRCAM	11724337_s_at	-1.63452	0.0033
TUBE1	11732219_a_at	-1.63345	0.0055
VLDLR	11721181_a_at	-1.63132	0.0014
PRNP	11748315_s_at	-1.6292	0.0013
HTR2A	11736752_x_at	-1.62496	0.0016
GTPBP2	11717184_a_at	-1.62259	0.0019
BMP2K	11736928_a_at	-1.61838	0.0027
TRPC4	11733319_a_at	-1.61629	0.003
RAB11FIP2	11724144_a_at	-1.61577	0.0022
HSPA13	11719070_a_at	-1.61577	0.0036
HINT3	11725674_at	-1.61447	0.0028
RPL32	11757122_s_at	-1.6129	0.0028
THBS1	11721091_a_at	-1.6116	0.0035
CREG1	11715682_a_at	-1.60901	0.0017
AKAP2	11741200_a_at	-1.60823	0.0075
ITPR1	11739564_s_at	-1.60772	0.0033
ARL4D	11758246_s_at	-1.6072	0.0057
B3GALT2	11729250_at	-1.60179	0.0035
CITED2	11753421_a_at	-1.60102	0.0017
NETO2	11722864_at	-1.59541	0.0036
HSPB7	11754949_s_at	-1.59337	0.0028
SLFN5	11752224_a_at	-1.58881	0.0094
CANX	11727423_a_at	-1.58856	0.0031
SYNPO	11719305_at	-1.58579	0.0039
DNAJB9	11757735_s_at	-1.58529	0.0025
RNF141	11726258_at	-1.58203	0.0027
HIF1A	11747800_a_at	-1.57928	0.0079
TFRC	11715477_at	-1.57903	0.0028
SPCS3	11721115_at	-1.57828	0.004
ORMDL1	11736300_a_at	-1.5758	0.0041
SNAPC1	11734793_at	-1.5753	0.0048
FAM107B	11746414_a_at	-1.57307	0.003
SLC4A4	11717820_a_at	-1.57307	0.0036
WNT5A	11727189_x_at	-1.57233	0.0031
WWC1	11729267_a_at	-1.57134	0.004
IARS	11750569_a_at	-1.57085	0.0041
CHST2	11718908_s_at	-1.56887	0.005
SEC11C	11744264_a_at	-1.56863	0.0035
PDCD1LG2	11736813_at	-1.5674	0.0035
SOD2	11748910_a_at	-1.5647	0.0082
ATP2B1	11743863_a_at	-1.56421	0.0047
EFHD1	11717516_s_at	-1.56421	0.0064
EFNB2	11720404_at	-1.56299	0.0041
CCDC152	11743942_at	-1.56128	0.006
CCND1	11751330_a_at	-1.56079	0.0046
KLHL5	11728768_s_at	-1.56006	0.0036
KIAA1715	11732298_a_at	-1.55982	0.0044
THBD	11755219_a_at	-1.55885	0.0044
TNFSF4	11731896_a_at	-1.55666	0.0075
AKIRIN1	11730741_a_at	-1.55545	0.0064
BNIP3	11743084_s_at	-1.55521	0.0039
ZNF655	11741101_a_at	-1.55376	0.0047
ENAH	11740107_a_at	-1.55352	0.0058
KIF2A	11750773_a_at	-1.55304	0.0135
SOX9	11758216_s_at	-1.55159	0.0088
CNKSR2	11759207_at	-1.55111	0.0062
PTAR1	11723387_a_at	-1.54943	0.0082
HK2	11756138_a_at	-1.54679	0.0051
RBBP8	11727547_s_at	-1.54583	0.0048
PNO1	11729185_at	-1.5456	0.006
LMCD1	11750298_a_at	-1.5444	0.0064
LONP1	11748721_a_at	-1.54345	0.0046
OLFM1	11726383_a_at	-1.54345	0.0092
HSP90B1	11754606_a_at	-1.54273	0.0161
EXOSC6	11735184_at	-1.54226	0.0053
C8orf34	11729088_at	-1.54154	0.0052
NGF	11729937_at	-1.54131	0.0122
STXBP6	11747726_s_at	-1.53941	0.0048
ULBP1	11730619_at	-1.53917	0.0092
HNRNPA3	11723201_s_at	-1.53846	0.0138
PION	11755044_x_at	-1.53822	0.008
CCT5	11723930_at	-1.53704	0.008
BEND3	11725579_s_at	-1.53633	0.0066
BEX1	11719475_a_at	-1.53586	0.0053
FRAS1	11723177_at	-1.53563	0.0073
IL15	11740881_x_at	-1.53539	0.0054
PER2	11758315_s_at	-1.53492	0.0126
ZNF239	11730497_a_at	-1.53374	0.0056
MYBL1	11725861_a_at	-1.5328	0.0066
LRP12	11728392_a_at	-1.53233	0.0125
C8orf4	11758013_s_at	-1.53186	0.0166
C10orf54	11718002_at	-1.53139	0.006
SLC1A4	11730614_a_at	-1.53069	0.017
RBPMS	11719981_a_at	-1.53022	0.005
RTTN	11756882_a_at	-1.52975	0.0125
PCDHA1	11727198_a_at	-1.52672	0.0078
GPAM	11721706_at	-1.52625	0.0105
ALDH1A3	11750102_x_at	-1.52602	0.006
EIF4EBP1	11718283_a_at	-1.52555	0.0076
EFCAB2	11728379_at	-1.52486	0.0061
FAM110B	11729827_at	-1.52416	0.0059
SCRN1	11751773_a_at	-1.52369	0.0177
GPR126	11725191_s_at	-1.52323	0.0094
ABHD5	11723701_at	-1.52138	0.0049
HYOU1	11756961_a_at	-1.52068	0.009
OSBPL8	11755548_a_at	-1.52045	0.0129
NDST1	11719776_at	-1.51953	0.0096
IRS2	11718012_at	-1.51653	0.0059
SLC6A9	11737326_a_at	-1.5163	0.0099
SGCD	11732317_a_at	-1.51538	0.0175
KRT18	11757905_x_at	-1.51492	0.0216
ARHGEF2	11754291_s_at	-1.51469	0.0112
TWF1	11758185_s_at	-1.514	0.0149
STC2	11721435_at	-1.514	0.022
RRS1	11719810_at	-1.51332	0.0104
CDC73	11753163_a_at	-1.51332	0.0114
DDX21	11759622_s_at	-1.51309	0.006
PGGT1B	11731074_at	-1.51217	0.0094
C6orf48	11715978_a_at	-1.51172	0.0069
PDK1	11733981_a_at	-1.51012	0.0073
BMI1	11756843_a_at	-1.50739	0.0075
FN1	11755897_a_at	-1.50625	0.0095
ZNF37A	11740099_a_at	-1.50534	0.0155
BTF3L4	11723420_s_at	-1.50421	0.0092
FICD	11754610_a_at	-1.50376	0.0073
GCLM	11723490_at	-1.50376	0.0131
OSBPL11	11723792_at	-1.50331	0.0109
FXN	11732322_at	-1.5024	0.0083
CTPS	11750141_a_at	-1.50173	0.0099
CLIP1	11740473_a_at	-1.5015	0.0116
CCL7	11729847_a_at	-1.5006	0.0265
SLC38A1	11717100_a_at	-1.50015	0.0235
HLX	11722111_at	-1.49858	0.011
TRIM16	11728668_x_at	-1.49835	0.0083
BRIX1	11748918_a_at	-1.49813	0.0184
ALDH3B1	11731722_a_at	-1.49723	0.0089
PLCB1	11730106_a_at	-1.49723	0.0189
ID2	11715994_x_at	-1.49701	0.0085
C1GALT1	11758562_s_at	-1.49477	0.0144
ZFR	11723760_a_at	-1.49432	0.0157
EGR1	11752940_a_at	-1.49254	0.0228
ADAMTS1	11732158_a_at	-1.49231	0.0126
MTHFD1L	11728986_x_at	-1.49187	0.0124
POPDC3	11729422_a_at	-1.49031	0.0192
AKNA	11730935_a_at	-1.48987	0.0098
OSBPL6	11750599_a_at	-1.48987	0.0203
SLC1A5	11716865_a_at	-1.48965	0.0228
TUFT1	11724882_x_at	-1.4892	0.0179
WDR1	11745609_x_at	-1.48743	0.0114
TMEM47	11721757_at	-1.48456	0.02
MAP2K1	11717291_a_at	-1.4828	0.0184
PPP3CA	11751254_a_at	-1.48258	0.0193
RAB39B	11728851_s_at	-1.48192	0.035
CEP135	11732601_at	-1.4806	0.009
COL4A1	11716638_s_at	-1.4806	0.0192
DACT1	11735385_s_at	-1.47929	0.0172
MXI1	11739744_x_at	-1.47907	0.017
PTTG1IP	11723942_s_at	-1.47885	0.0158
ADAMTS5	11726854_s_at	-1.4782	0.0039
MYLK	11721837_a_at	-1.47798	0.012
SH2B3	11717409_at	-1.47754	0.0172
CKS1B	11754031_s_at	-1.47645	0.013
TMEM106B	11721215_a_at	-1.4758	0.0199
ATAD1	11749899_a_at	-1.47471	0.0148
TFPI	11757793_s_at	-1.47471	0.0197
ANKRD57	11723883_at	-1.47384	0.0125
PEAR1	11732925_s_at	-1.47341	0.0085
ACTR2	11743580_s_at	-1.47167	0.0306
STT3B	11756482_x_at	-1.47145	0.0288
INPP4B	11739840_a_at	-1.47037	0.0213
ANXA3	11724283_a_at	-1.46951	0.0126
TOX2	11723612_a_at	-1.46951	0.0436
NARG2	11722630_a_at	-1.46908	0.014
NRG1	11727215_a_at	-1.46864	0.0166
ZNF238	11721601_s_at	-1.46864	0.0184
ST3GAL1	11718738_a_at	-1.46778	0.0248
TSEN15	11720555_a_at	-1.46606	0.0166
EDEM1	11722262_at	-1.46563	0.0138
PMS1	11748652_x_at	-1.46477	0.0099
KIAA0090	11721807_a_at	-1.46477	0.0167
ATP1B1	11726272_a_at	-1.46434	0.0255
CYR61	11749905_a_at	-1.46391	0.0169
PABPC1L	11721609_a_at	-1.4637	0.0105
EXOSC8	11717589_a_at	-1.4637	0.016
ADM2	11730578_at	-1.46306	0.0232
LGR4	11743626_s_at	-1.46263	0.017
GPT2	11719162_a_at	-1.4622	0.02
C5orf23	11722758_at	-1.46177	0.0122
C6orf62	11751713_a_at	-1.46049	0.0214
FOS	11749291_a_at	-1.45943	0.0103
FZD6	11749125_a_at	-1.45858	0.0249
COL4A2	11715452_s_at	-1.4573	0.0279
GATA2	11722761_a_at	-1.45709	0.0184
HMOX1	11716939_a_at	-1.45709	0.0457
TMEM33	11739104_x_at	-1.45688	0.0184
PHF17	11725073_s_at	-1.45666	0.0216
GLS	11743151_a_at	-1.45666	0.0236
DNAJC3	11717373_at	-1.45582	0.0161
KCTD15	11728331_a_at	-1.4556	0.0073
ZNF800	11736418_a_at	-1.45476	0.0145
ACTC1	11720489_a_at	-1.45476	0.0368
EIF5	11724726_s_at	-1.45455	0.0237
HSPB8	11715776_a_at	-1.45264	0.0113
MRTO4	11724751_at	-1.45222	0.0208
MIS12	11725145_a_at	-1.45201	0.0126
N4BP2L2	11733494_a_at	-1.45159	0.0106
C5orf30	11743416_s_at	-1.45138	0.0106
GPR133	11731143_a_at	-1.45075	0.03
ST6GALNAC5	11727448_x_at	-1.45054	0.0313
SEMA3C	11723666_a_at	-1.45012	0.0112
ROD1	11733056_s_at	-1.44991	0.0292
NFASC	11722322_at	-1.44886	0.0285
AP4E1	11728635_a_at	-1.44865	0.0157
MAK16	11725393_s_at	-1.44865	0.0203
S1PR3	11725905_a_at	-1.44844	0.0393
RPS29	11730323_at	-1.44802	0.0237
NFKBIZ	11757513_at	-1.44781	0.0308
TSPAN2	11728388_at	-1.44697	0.0282
NAA15	11745181_a_at	-1.44655	0.0277
GOLGA8A	11744407_x_at	-1.44634	0.0279
IRX3	11725001_at	-1.44634	0.0394
GABBR2	11726427_at	-1.4455	0.0191
PTP4A1	11717897_a_at	-1.44467	0.0223
KIAA1462	11743783_a_at	-1.44404	0.0184
FADS3	11719032_a_at	-1.44383	0.0164
IER3	11720062_s_at	-1.44383	0.0276
GRPEL2	11719301_s_at	-1.43968	0.0398
ROR1	11738115_at	-1.43947	0.0224
NHSL1	11755756_a_at	-1.43947	0.0457
IL18R1	11735275_at	-1.43864	0.0366
ARHGAP5	11730291_a_at	-1.43823	0.0316
RBAK	11736445_a_at	-1.43802	0.0384
GLRX2	11727209_a_at	-1.43761	0.0225
EEF1A1	11736053_x_at	-1.43637	0.0255
BNIP3L	11748909_a_at	-1.43616	0.0225
EIF3C	11741662_a_at	-1.43596	0.0228
CENPV	11722721_a_at	-1.43554	0.0269
FAM190B	11744934_a_at	-1.4341	0.0378
BBX	11720656_a_at	-1.4339	0.0335
SRP19	11758864_at	-1.43287	0.0176
DNM1L	11750026_a_at	-1.43246	0.0231
SDC4	11717638_at	-1.43246	0.0235
EPAS1	11715411_a_at	-1.43184	0.0203
AFAP1	11733383_a_at	-1.43102	0.0288
CCNE2	11728300_at	-1.43062	0.0229
POLR1E	11735123_x_at	-1.43	0.0294
RAB3B	11736461_at	-1.43	0.0361
SERP2	11738270_a_at	-1.42878	0.0295
PTCH1	11743680_x_at	-1.42857	0.0314
SCAMP1	11733055_a_at	-1.42857	0.0457
MAP9	11725015_x_at	-1.42613	0.0259
GPD2	11739427_a_at	-1.42531	0.0485
XPOT	11716831_at	-1.42369	0.0236
DLEU2	11744730_s_at	-1.42369	0.045
PODXL	11736678_s_at	-1.42308	0.028
IGFBP3	11749912_x_at	-1.42308	0.0285
NOV	11723033_at	-1.42268	0.0288
UQCRH	11759575_at	-1.42248	0.0308
TIGD2	11728918_at	-1.42248	0.0323
EZR	11742989_a_at	-1.42207	0.0154
CLTCL1	11724990_s_at	-1.42126	0.0332
MINA	11727083_a_at	-1.42126	0.0363
LARP6	11722417_a_at	-1.42106	0.0346
CNN2	11723414_a_at	-1.41864	0.0309
SLC38A2	11738999_a_at	-1.41764	0.0394
SIX1	11758110_s_at	-1.41743	0.0195
DDX10	11723101_a_at	-1.41743	0.0267
TRMT6	11743079_a_at	-1.41743	0.0299
RRAS2	11747262_s_at	-1.41683	0.0313
AKAP7	11727737_s_at	-1.41603	0.0205
HSPH1	11748072_a_at	-1.41603	0.0313
ABCE1	11752588_s_at	-1.41543	0.0345
PFN2	11744716_a_at	-1.41523	0.0256
HLA-F	11718230_a_at	-1.41403	0.0457
UCHL1	11754803_s_at	-1.41383	0.0316
C13orf33	11736363_s_at	-1.41343	0.0111
PDSS1	11720547_a_at	-1.41263	0.0172
SHMT2	11756615_x_at	-1.41243	0.0314
DDX3Y	11724076_a_at	-1.41203	0.0286
PKM2	11752166_x_at	-1.41123	0.0343
TAF1D	11730436_x_at	-1.41103	0.0298
TAP2	11723059_a_at	-1.41084	0.0342
DPH5	11756500_x_at	-1.41024	0.0308
RMI1	11745203_a_at	-1.40984	0.0301
RNF187	11730196_at	-1.40905	0.0264
BGN	11721244_a_at	-1.40905	0.034
SPINT2	11745496_a_at	-1.40746	0.0269
UBXN2A	11749832_x_at	-1.40687	0.0385
SPOCK1	11720051_at	-1.40588	0.0317
FAM26F	11723025_at	-1.40528	0.0321
STAC	11730551_a_at	-1.40528	0.0406
WASF3	11757981_s_at	-1.40509	0.0352
EIF1B	11717247_a_at	-1.4043	0.0367
DCUN1D4	11747011_a_at	-1.4041	0.0411
SS18	11722799_a_at	-1.40351	0.0409
PABPC4	11754030_a_at	-1.40311	0.0298
ACYP2	11735240_a_at	-1.40272	0.0268
RSL1D1	11736010_at	-1.40233	0.0195
PPPDE2	11718607_x_at	-1.40233	0.0358
RPGR	11726119_at	-1.40213	0.0415
ME1	11726265_at	-1.40174	0.0436
MARS	11755845_x_at	-1.40135	0.0437
C5orf28	11746391_a_at	-1.40056	0.0436
KIAA1430	11743187_at	-1.39958	0.0367
LMO4	11721660_s_at	-1.39938	0.0457
DENND2D	11755291_a_at	-1.39919	0.03
CDC42EP3	11720499_at	-1.39899	0.0437
SEPHS2	11743803_s_at	-1.39782	0.0392
SORBS2	11735570_a_at	-1.39743	0.0099
NLN	11725117_a_at	-1.39743	0.0414
LOC100132891	11752813_a_at	-1.39704	0.0276
YAF2	11746464_a_at	-1.39684	0.0327
EEF1E1	11743582_a_at	-1.39665	0.0475
PGAP1	11755641_s_at	-1.39528	0.0406
SPAG1	11740420_s_at	-1.39509	0.0391
NDRG1	11753232_a_at	-1.39431	0.0368
BYSL	11717444_at	-1.39392	0.0397
TAF13	11737896_s_at	-1.39373	0.0367
PCGF5	11758060_s_at	-1.39334	0.0393
LRRC49	11748065_a_at	-1.39276	0.0338
TTC30A	11728326_a_at	-1.39256	0.0338
NMT2	11750949_a_at	-1.39256	0.0401
VPS35	11743391_a_at	-1.39256	0.0408
FAM178A	11719360_at	-1.39218	0.0368
ZNF326	11746311_a_at	-1.39218	0.0394
C7orf60	11723621_at	-1.39218	0.0451
TMEM20	11758422_s_at	-1.3914	0.0399
AIMP2	11716562_at	-1.38927	0.0479
MANF	11715795_at	-1.38773	0.0385
BHLHE41	11758031_s_at	-1.38754	0.0324
RPL34	11743266_a_at	-1.38754	0.0368
DARS	11746469_x_at	-1.38715	0.0372
STARD7	11715663_a_at	-1.38715	0.0422
USP45	11736769_a_at	-1.38696	0.04
CPB1	11715443_a_at	-1.38581	0.0276
CGRRF1	11758806_at	-1.38504	0.0484
PHGDH	11728203_a_at	-1.38408	0.0368
THAP10	11729684_at	-1.38255	0.0483
SCOC	11745740_x_at	-1.38198	0.0366
GXYLT1	11724162_a_at	-1.38198	0.0476
UGGT2	11719445_a_at	-1.38122	0.0416
SIAH2	11743068_at	-1.38122	0.0436
GNAQ	11733108_at	-1.38102	0.0331
SLC33A1	11729225_s_at	-1.37988	0.0437
KCNJ8	11725806_at	-1.37969	0.0366
TIMM8B	11759553_at	-1.3795	0.0481
FAM175A	11729279_x_at	-1.37931	0.0409
SH3BP4	11754466_a_at	-1.37855	0.0437
RPS14	11725714_a_at	-1.37798	0.0387
SNHG1	11757113_a_at	-1.37798	0.0401
ABCA6	11739904_a_at	-1.37779	0.0367
UNC5B	11758968_at	-1.37665	0.0485
ZC3HAV1L	11763395_a_at	-1.37552	0.0392
BMP6	11743948_at	-1.37495	0.05
RWDD4	11722396_x_at	-1.37476	0.0393
RGS20	11725274_s_at	-1.36855	0.0465
TP53RK	11721485_at	-1.36519	0.0408
IPP	11737209_a_at	-1.36426	0.0463
RTN3	11741316_x_at	-1.36351	0.0497
ITGA3	11756790_a_at	-1.35796	0.0469
SPAG4	11727331_at	-1.35685	0.0427
PTPRG	11748927_a_at	-1.35593	0.0488
LOH3CR2A	11744741_at	-1.34753	0.0288
NTN4	11717803_a_at	-1.34553	0.0399
DDAH1	11716917_a_at	-1.34066	0.0302
PDLIM4	11730740_a_at	-1.33743	0.0436
GCNT1	11735270_a_at	-1.32714	0.0339
LBH	11716162_at	-1.32205	0.0451
NTM	11731649_x_at	-1.31148	0.0156
LYPD6	11731734_a_at	-1.28254	0.0397
THBS4	11721212_a_at	4.4776	0
FABP3	11742981_a_at	4.0318	0
COL10A1	11735219_at	4.0316	0
MBP	11732567_at	3.5533	0
FOXQ1	11758028_s_at	3.3585	0
C1QTNF3	11734565_s_at	3.2199	0
SFRP2	11720606_a_at	3.0674	0
COL14A1	11757921_s_at	3.0518	0
MOBKL2B	11725168_s_at	3.0198	0
OGN	11736191_s_at	3.0068	0
FMO1	11754496_x_at	2.9905	0
SLC1A2	11718492_at	2.9613	0
APCDD1	11757736_s_at	2.9336	0
RSPO3	11724619_at	2.8522	0
OLFML2A	11720277_a_at	2.8177	0
RNF144A	11757347_s_at	2.791	0
PLXDC1	11726845_s_at	2.7809	0
PMEPA1	11716149_a_at	2.7537	0
RGS4	11732993_a_at	2.7523	0
PCSK9	11723499_a_at	2.7249	0
KCNJ2	11730465_at	2.7153	0
PLXNC1	11759184_at	2.6929	0
AQP1	11715942_a_at	2.6904	0
SLC40A1	11715788_a_at	2.6659	0
SPON2	11716526_x_at	2.6174	0
WFDC1	11727601_a_at	2.5357	0
CD9	11715568_a_at	2.4922	0
NKD2	11735421_a_at	2.4784	0
ZNF436	11743686_a_at	2.4545	0
OLFML2B	11720440_at	2.3871	0
PTGER4	11725793_s_at	2.3861	0
CCRL1	11741285_a_at	2.3641	0
DUSP4	11744162_a_at	2.351	0
ANGPTL2	11718267_a_at	2.3236	0
PDGFRL	11723535_at	2.3166	0
MMP27	11735567_at	2.3151	0
C1QTNF6	11755769_a_at	2.3064	0
METTL7A	11757815_s_at	2.3028	0
PKIG	11728295_a_at	2.2938	0
QPRT	11749391_x_at	2.2846	0
MAFB	11721630_at	2.2588	0.0001
KIAA1217	11731663_a_at	2.2385	0
FAM180A	11728596_a_at	2.209	0
TRIL	11757583_s_at	2.1827	0
RIPK3	11723020_a_at	2.1672	0
DPT	11744168_at	2.1158	0
INSIG1	11716339_a_at	2.0975	0
CIT	11744436_a_at	2.0961	0
ST6GAL2	11724383_at	2.0838	0.0005
PTHLH	11731897_a_at	2.0678	0.0002
CEBPA	11726294_s_at	2.062	0.0004
PTN	11753666_x_at	2.0494	0
KIAA0101	11736250_a_at	2.0464	0
STEAP4	11720007_a_at	2.0244	0
HMGCS1	11716987_a_at	2.0238	0
PLA2G4A	11727754_a_at	2.0099	0
BHLHE22	11727312_at	2.0015	0.0004
CYYR1	11722504_at	1.996	0
EBP	11717859_a_at	1.9924	0
LRRN4CL	11733167_at	1.9836	0
SCARA3	11726173_at	1.9736	0
SLC1A3	11726252_a_at	1.9713	0.0007
C13orf15	11717582_a_at	1.9664	0.0001
PDE7B	11757985_s_at	1.9657	0
C1orf85	11756436_x_at	1.9623	0
NPTX1	11755325_s_at	1.9572	0.0001
CLK1	11744828_a_at	1.9571	0.0002
GPRC5B	11719176_a_at	1.9555	0
C1QTNF5	11735346_s_at	1.9518	0.0002
SCD	11715562_x_at	1.9447	0.0002
ETV1	11733180_a_at	1.9364	0.0017
ZBTB20	11763449_a_at	1.9248	0
ZNF608	11755450_a_at	1.9219	0
DIO2	11721579_a_at	1.9202	0.0005
TMSB15A	11720240_at	1.9163	0
AXIN2	11718452_at	1.9149	0
LRRC32	11721995_a_at	1.9125	0.0001
EMILIN1	11729869_a_at	1.8968	0
IL17RD	11723173_at	1.8938	0
FADS2	11754939_x_at	1.8917	0
C1orf213	11726878_s_at	1.8867	0
SERTAD4	11731246_s_at	1.8817	0.0004
BIRC5	11733864_a_at	1.8776	0.0003
SYTL2	11755671_a_at	1.8711	0.0002
TGFB3	11727296_s_at	1.8707	0.0005
SMOC2	11715972_at	1.862	0.0027
RAB42	11737299_at	1.8619	0.0003
ROBO2	11729987_s_at	1.8585	0.0004
CSTF3	11723798_a_at	1.8552	0.0002
FARS2	11744181_a_at	1.8455	0.0001
C10orf72	11739622_at	1.8451	0.0001
STMN2	11758790_a_at	1.844	0.0001
CRIP1	11721704_a_at	1.8432	0.0005
AHNAK2	11746228_a_at	1.8352	0.001
HCFC1R1	11724066_s_at	1.8331	0.0001
OSR2	11723576_s_at	1.83	0.0018
WNT2	11731558_a_at	1.8292	0.0017
PDPN	11724735_a_at	1.8262	0.0003
MLPH	11719265_a_at	1.8192	0.0004
COL12A1	11763525_at	1.8168	0.0005
FAM46C	11739339_s_at	1.8122	0.0002
PRDM2	11725778_a_at	1.8067	0.0017
LPIN1	11757747_s_at	1.7975	0.0003
CLIC2	11734784_a_at	1.7952	0.0005
LPAR6	11743071_a_at	1.7948	0.0005
RGS3	11750154_a_at	1.7914	0.0005
WISP2	11735059_a_at	1.7901	0.0015
TXNDC16	11723856_at	1.786	0.0005
PRRX1	11737200_a_at	1.7854	0.0004
PDXDC1	11759855_s_at	1.7852	0.0021
C14orf37	11734098_at	1.7774	0.0003
RORA	11725676_a_at	1.775	0.0005
GALNT5	11734557_a_at	1.7719	0.0005
TMEM35	11722557_at	1.7719	0.0006
OMD	11728328_at	1.7713	0.0018
PTGER3	11730484_at	1.7651	0.0008
DBP	11752942_s_at	1.7648	0.0004
NEK6	11725182_a_at	1.7628	0.0014
MASP1	11756901_a_at	1.7619	0.0005
GPR68	11724424_at	1.76	0.0002
DYSF	11745836_x_at	1.7593	0.0003
SPON1	11724503_at	1.7565	0.0016
C5orf4	11755573_s_at	1.7507	0.0005
COL13A1	11730533_a_at	1.7424	0.0005
CLU	11756547_a_at	1.7407	0.0004
PDDC1	11726069_a_at	1.7397	0.0006
CDON	11739783_a_at	1.7375	0.0005
EPHB3	11724421_at	1.7274	0.0005
UAP1L1	11733346_at	1.7267	0.0011
MVP	11716135_a_at	1.724	0.0007
FDPS	11758249_s_at	1.7238	0.0004
ZFHX4	11729327_a_at	1.7233	0.0014
SFXN3	11723217_x_at	1.7208	0.0007
CD276	11721467_s_at	1.7193	0.0007
P4HA3	11725272_a_at	1.7187	0.0013
GUCY1A3	11722137_a_at	1.717	0.0034
CAPG	11744276_a_at	1.7167	0.0011
TCF4	11724240_at	1.7167	0.0017
OAS3	11723699_s_at	1.7162	0.0005
MOXD1	11719601_a_at	1.7135	0.0005
NEU1	11715838_a_at	1.7112	0.0008
EFNB3	11722318_a_at	1.708	0.0006
ZFP106	11755011_x_at	1.7058	0.0015
S100A4	11718064_a_at	1.6979	0.0005
NYNRIN	11722292_a_at	1.6964	0.0005
F10	11723802_at	1.6964	0.0017
AKAP13	11722594_at	1.6941	0.0017
ARMC9	11725828_a_at	1.6897	0.0015
HSD17B14	11720588_a_at	1.6797	0.0007
STAU2	11759572_a_at	1.6788	0.0018
N4BP2L1	11755903_x_at	1.6711	0.0012
TMEM30B	11755726_a_at	1.6711	0.0016
ARL4A	11739230_a_at	1.6711	0.0029
IFI6	11718986_a_at	1.6697	0.0005
PODN	11730768_x_at	1.669	0.0089
GNPDA1	11758223_s_at	1.6665	0.0012
LEPREL2	11757183_x_at	1.6651	0.0011
PNMAL1	11715210_s_at	1.6585	0.0083
REEP2	11721847_a_at	1.6571	0.0023
GSN	11723329_a_at	1.6563	0.0008
LMNA	11752506_s_at	1.6557	0.0011
MMAB	11720535_a_at	1.6533	0.0011
MAGED4	11742452_s_at	1.6528	0.0026
ZCCHC14	11718880_at	1.6508	0.0016
SNX29	11743589_at	1.6506	0.0016
LOC100506582	11763989_at	1.6493	0.0024
LRRC15	11723164_a_at	1.6482	0.0016
KIFAP3	11739068_a_at	1.6447	0.0015
EEPD1	11726021_s_at	1.6442	0.0017
GPSM2	11720967_a_at	1.6432	0.0011
SREBF1	11715959_a_at	1.6402	0.001
RCAN2	11719671_a_at	1.6396	0.0012
MYO10	11744347_a_at	1.6359	0.0021
VWA5A	11723563_at	1.6356	0.0011
FDFT1	11748275_x_at	1.6341	0.0014
SLC7A8	11722159_a_at	1.6327	0.0011
KLF6	11716094_a_at	1.6313	0.0017
AK5	11729382_a_at	1.6308	0.0025
SERPINB7	11733997_a_at	1.6304	0.0032
MMP11	11721124_s_at	1.6297	0.0079
C13orf18	11754859_x_at	1.6269	0.006
DPYSL3	11715751_a_at	1.6263	0.0011
SAMHD1	11749510_a_at	1.625	0.0015
SERPINF1	11756313_x_at	1.6249	0.0011
TBC1D2B	11732936_a_at	1.624	0.0017
PER3	11719045_a_at	1.6239	0.005
MTUS1	11716913_a_at	1.6231	0.0015
SETDB2	11755008_x_at	1.622	0.0018
EMP1	11758781_at	1.6189	0.0024
MX1	11716167_a_at	1.6173	0.0015
SELENBP1	11716401_a_at	1.6161	0.0018
PPT1	11716533_a_at	1.614	0.0014
MVD	11729695_a_at	1.6137	0.0025
GXYLT2	11731126_at	1.613	0.0015
DBI	11754122_x_at	1.6098	0.0011
FKBP11	11733701_a_at	1.6084	0.0012
KCTD7	11723765_at	1.6077	0.0096
COL8A2	11743667_at	1.6071	0.0072
AKR1C3	11715711_a_at	1.6058	0.0017
PMVK	11754085_a_at	1.6055	0.0031
CPXM2	11719536_at	1.6047	0.0038
TGFBR3	11718900_a_at	1.6046	0.0017
LSS	11724199_x_at	1.6032	0.0011
IFI44	11719886_a_at	1.6028	0.0015
KIF20A	11723010_a_at	1.6011	0.0011
ABCB4	11732819_a_at	1.5998	0.0038
ZNF385D	11732610_at	1.5998	0.0058
GDF10	11729995_a_at	1.5991	0.0061
LYST	11722982_a_at	1.5985	0.003
LRRC17	11726291_a_at	1.5959	0.0034
TMEM135	11752680_a_at	1.5955	0.0025
MAP7	11757918_s_at	1.5917	0.0018
DNM1	11754476_x_at	1.5914	0.0016
DDIT4L	11724796_at	1.5904	0.0039
MEF2C	11723215_s_at	1.5892	0.0087
RASSF2	11746639_a_at	1.5878	0.0018
C11orf75	11723559_a_at	1.5851	0.0061
PRRT2	11754960_a_at	1.5849	0.0036
FGD6	11723187_at	1.5841	0.006
UPF1	11754617_s_at	1.5838	0.0037
FAM82A1	11763512_x_at	1.5814	0.0022
TCTN3	11740851_a_at	1.5808	0.0018
ANKRD28	11722637_a_at	1.5808	0.0055
KLF13	11718160_at	1.5807	0.0017
CELF2	11733261_a_at	1.5803	0.0033
IGSF10	11728030_a_at	1.5803	0.0282
FOXM1	11725441_a_at	1.5793	0.0161
CSRP2	11729239_x_at	1.5786	0.0011
SH3PXD2A	11717126_at	1.5771	0.0094
FOSL2	11763170_s_at	1.5758	0.003
SECTM1	11739527_a_at	1.5728	0.0015
FAM46A	11746689_a_at	1.5718	0.0023
SNRPA	11744270_a_at	1.5718	0.0061
HRH1	11737050_x_at	1.5715	0.0036
C7orf10	11723151_s_at	1.5715	0.0061
HDAC5	11717036_a_at	1.5714	0.0059
DCLK1	11728342_at	1.5696	0.0055
MITF	11720263_a_at	1.5674	0.0065
ECM1	11717891_a_at	1.5673	0.0038
SOBP	11734893_s_at	1.5663	0.0192
MARCH2	11724410_x_at	1.5652	0.0047
CNPY4	11721189_at	1.565	0.0041
PTGER2	11732550_at	1.5631	0.003
WDR81	11744486_x_at	1.5618	0.0018
FAM109B	11719356_at	1.5617	0.0091
TSPAN13	11755284_s_at	1.5602	0.0025
ELL3	11722636_a_at	1.5599	0.0024
AKAP12	11723805_a_at	1.5594	0.013
LY6E	11715419_at	1.5572	0.0023
CCDC109B	11758793_at	1.5552	0.0159
ATP6V0D1	11749317_a_at	1.5551	0.0053
FKBP1B	11723839_a_at	1.555	0.0036
GUCY1B3	11726581_a_at	1.5542	0.0038
SRPX2	11723439_at	1.5536	0.0041
ANKRD10	11718563_a_at	1.5532	0.0154
ACAT2	11746009_a_at	1.5531	0.0025
TXNDC15	11754721_a_at	1.5529	0.0057
KREMEN1	11723729_at	1.5507	0.003
CYS1	11739828_s_at	1.5506	0.0063
SQRDL	11718515_a_at	1.5436	0.0026
NOD1	11734126_a_at	1.5431	0.0032
SLC35B2	11718664_a_at	1.5428	0.0088
HSD3B7	11758252_s_at	1.5414	0.0036
RNF213	11754352_a_at	1.5413	0.0072
KLHL24	11757390_s_at	1.5384	0.0088
LDLR	11720028_x_at	1.5382	0.0032
PHF20L1	11742453_at	1.5371	0.0097
PYCARD	11721169_a_at	1.5366	0.0025
SLC43A1	11744921_a_at	1.5364	0.0065
MFAP2	11756810_a_at	1.5361	0.0079
MTHFR	11727178_x_at	1.5346	0.0031
SLC17A5	11752119_x_at	1.5342	0.0182
CCDC50	11733157_a_at	1.5335	0.0101
FAM134B	11753179_s_at	1.533	0.0017
CLEC2B	11721302_a_at	1.5326	0.0039
IFITM1	11715670_a_at	1.5307	0.0038
KIAA1324L	11741802_a_at	1.529	0.0096
DHCR24	11715460_a_at	1.528	0.0092
DPM3	11722238_a_at	1.527	0.0039
SMTN	11719262_a_at	1.527	0.0076
SCFD2	11723960_at	1.5265	0.0051
SEMA3A	11730391_at	1.5262	0.0042
GLA	11716719_s_at	1.5256	0.0053
RAET1G	11756861_s_at	1.5244	0.0041
ACYP1	11728974_a_at	1.5241	0.0106
AARS	11716636_a_at	1.5238	0.0038
GET4	11763328_a_at	1.5218	0.0067
CILP2	11726182_at	1.5205	0.0378
HIST2H2AA3	11742657_x_at	1.52	0.0132
TRIM52	11758993_at	1.5196	0.0172
ANG	11721569_a_at	1.5194	0.0041
ARHGAP28	11723981_s_at	1.5183	0.017
C10orf116	11717305_a_at	1.5174	0.0038
CCNB2	11716793_a_at	1.5163	0.0129
POLR2L	11753875_a_at	1.5151	0.0033
MGP	11716203_a_at	1.5147	0.0049
C14orf139	11754198_at	1.5131	0.0056
ANXA6	11715803_a_at	1.5129	0.0049
TNRC6B	11736495_a_at	1.5121	0.0079
PAM	11743830_a_at	1.511	0.0065
INMT	11720749_a_at	1.5104	0.0125
RASL11B	11744230_s_at	1.5103	0.0175
GLB1L	11753953_x_at	1.5088	0.0103
MAML3	11743879_at	1.5083	0.0123
MAF	11733088_at	1.5062	0.0125
KAT2B	11720669_at	1.5061	0.0067
LAMA1	11738028_a_at	1.5053	0.0153
TK1	11718127_at	1.5042	0.0088
TCF7	11755180_x_at	1.5042	0.0106
HABP4	11722854_at	1.5038	0.0408
EEF2K	11728792_x_at	1.5027	0.017
MYO6	11715911_at	1.5022	0.0145
RSPO1	11752250_a_at	1.5017	0.0036
COMTD1	11720130_x_at	1.5015	0.0065
LEPR	11726871_s_at	1.501	0.011
SYNE2	11756450_s_at	1.5005	0.0073
AGPAT4	11721652_a_at	1.5004	0.0092
CDH18	11747423_a_at	1.4997	0.0097
SLC9A9	11757926_s_at	1.4987	0.0086
NPC2	11716828_a_at	1.497	0.0056
HS1BP3	11722490_a_at	1.4965	0.0075
GALNT1	11743290_at	1.4963	0.0166
CLEC11A	11716922_x_at	1.4955	0.0156
BNC2	11727769_at	1.495	0.0149
CLCN5	11719164_a_at	1.4937	0.0104
NAV2	11720565_a_at	1.4936	0.0061
SQLE	11717729_a_at	1.4913	0.0138
C22orf9	11725352_a_at	1.4904	0.0096
MMP19	11719531_a_at	1.4901	0.0071
MXD4	11736489_a_at	1.4892	0.0066
AKR1C1	11719171_a_at	1.4886	0.0036
CRABP2	11716609_a_at	1.4881	0.0074
AHR	11751921_s_at	1.488	0.0139
CDKN3	11753763_x_at	1.4879	0.0099
LRIG1	11755110_a_at	1.4878	0.0042
GDF11	11725505_a_at	1.4878	0.0063
NFATC4	11752353_x_at	1.4869	0.0065
BCAS1	11750205_a_at	1.4864	0.009
HMCN1	11755071_a_at	1.4843	0.0096
EPM2AIP1	11725355_at	1.4837	0.0145
CDC25B	11718005_a_at	1.4835	0.01
ANPEP	11746965_a_at	1.4831	0.0064
KCNS3	11722918_a_at	1.4819	0.048
ARAP1	11719038_a_at	1.4818	0.0246
ADCY4	11755003_a_at	1.4811	0.0107
CUBN	11735086_x_at	1.4801	0.0056
STX3	11719534_a_at	1.4791	0.0147
NDRG4	11736068_x_at	1.4788	0.0154
HUNK	11740168_at	1.4783	0.0096
MAP3K6	11724100_at	1.4771	0.035
PLAGL1	11737052_x_at	1.4761	0.0157
ACP5	11717981_a_at	1.476	0.0122
PALLD	11755122_a_at	1.4753	0.0105
ADAM12	11722200_s_at	1.475	0.0209
CDC20	11717163_s_at	1.4748	0.0089
CPM	11731461_x_at	1.4738	0.0131
PDXK	11718138_at	1.4735	0.0205
GM2A	11719923_at	1.4726	0.0095
FNDC4	11719330_s_at	1.4725	0.0171
C14orf1	11757616_s_at	1.47	0.0168
OSBPL5	11735165_s_at	1.4692	0.01
COPE	11741239_x_at	1.4683	0.0096
KIF1B	11718634_a_at	1.4682	0.0096
DCN	11763262_at	1.4674	0.0153
NPNT	11718435_a_at	1.467	0.0172
IFNGR2	11715532_a_at	1.4669	0.0137
PPAPDC1A	11728520_a_at	1.4669	0.0259
NINJ2	11721393_at	1.4661	0.0152
CPNE1	11719048_a_at	1.4651	0.0122
CERCAM	11750885_a_at	1.4651	0.0147
FKBP5	11739567_s_at	1.4649	0.0258
LUM	11715796_s_at	1.4645	0.0146
RUNX1	11732933_a_at	1.4645	0.0361
RASSF1	11722247_a_at	1.464	0.0248
STARD9	11756879_a_at	1.464	0.0368
AKR1C2	11729101_a_at	1.4635	0.0065
RTP4	11725240_at	1.463	0.0234
COMMD4	11716445_s_at	1.4627	0.0099
ARMCX1	11720048_x_at	1.4627	0.0187
C10orf28	11747795_a_at	1.4621	0.0366
UNC13B	11717680_at	1.461	0.0115
WNT11	11763605_a_at	1.4605	0.0117
PBX3	11742072_a_at	1.4605	0.02
STON1	11739699_at	1.46	0.0299
GPNMB	11759826_x_at	1.4597	0.015
C6orf226	11724332_at	1.4591	0.0118
IFI27	11757480_x_at	1.4582	0.0173
DYNC1H1	11715591_s_at	1.4582	0.0187
ASPM	11742832_a_at	1.4574	0.0207
TPK1	11724435_a_at	1.457	0.0158
DNM3	11758498_at	1.4567	0.0161
IFI35	11719491_a_at	1.4566	0.0173
CCDC102B	11738200_a_at	1.4562	0.0099
C7orf59	11757392_a_at	1.4555	0.0174
ACSS2	11722346_a_at	1.4543	0.0199
HTRA3	11721390_at	1.4538	0.0185
TRIB2	11716941_at	1.4535	0.0375
NPAS3	11729507_a_at	1.4529	0.0145
NCALD	11736718_a_at	1.4528	0.0153
COL1A1	11715352_x_at	1.4528	0.0172
PHLDA1	11721306_at	1.4512	0.0181
CCDC8	11740068_at	1.4512	0.0219
DTWD1	11727213_s_at	1.4509	0.0348
GPR153	11759185_at	1.4508	0.0377
PITX2	11729935_a_at	1.4505	0.0161
NRN1	11763492_a_at	1.449	0.0153
UBN2	11727510_at	1.4483	0.0441
HMGCR	11727374_s_at	1.4479	0.0232
SEPT6	11744594_a_at	1.4474	0.0172
RARRES3	11719692_a_at	1.4446	0.0409
UBE2QL1	11744075_at	1.4443	0.0185
RAB7B	11754764_a_at	1.4435	0.0272
STRBP	11727158_a_at	1.4433	0.0493
BMP4	11734013_a_at	1.4428	0.017
PTBP2	11722804_x_at	1.4427	0.0192
KDELC1	11755062_a_at	1.4426	0.0145
TMSB15B	11726136_a_at	1.4421	0.0442
BPHL	11743777_x_at	1.4412	0.027
HSD17B7	11732374_x_at	1.4396	0.0433
TMEM119	11721198_a_at	1.4387	0.0205
REPS2	11722348_a_at	1.4386	0.006
PRUNE2	11718241_a_at	1.4382	0.0147
PHF19	11722880_a_at	1.4379	0.0279
FYCO1	11755818_a_at	1.4374	0.0163
ARHGEF25	11725006_a_at	1.4365	0.0352
MCTP2	11740137_s_at	1.4348	0.0339
APOBEC3A	11732901_a_at	1.4347	0.003
ELOVL6	11743451_s_at	1.4342	0.0289
HLA-E	11758879_s_at	1.4341	0.0388
ZFP36L2	11715818_at	1.4334	0.0299
ACSF2	11719035_a_at	1.4329	0.0183
IFFO1	11720551_a_at	1.4322	0.023
KBTBD3	11739758_a_at	1.4318	0.0237
GAS1	11721895_x_at	1.4317	0.018
IDI1	11744474_s_at	1.4316	0.0376
NUCB2	11763187_a_at	1.4311	0.0207
ABCC6	11725890_s_at	1.4309	0.0157
TNFRSF14	11745772_x_at	1.4309	0.0375
PHACTR3	11726088_s_at	1.4307	0.0205
SLC37A4	11716064_a_at	1.4301	0.0255
TRPV2	11755902_a_at	1.4284	0.0214
WWC3	11718327_a_at	1.4277	0.035
MOBKL2C	11728172_a_at	1.4255	0.0441
CYTH3	11757447_s_at	1.425	0.0272
PTGFR	11734180_a_at	1.4242	0.0174
AKR1A1	11716509_a_at	1.4238	0.0197
MAPRE2	11764039_s_at	1.4228	0.026
C19orf20	11744139_at	1.422	0.0279
GADD45B	11757865_a_at	1.4206	0.0226
B3GALT4	11726055_at	1.4201	0.0247
FMNL2	11719980_a_at	1.4199	0.0259
ITSN1	11750609_a_at	1.4198	0.0498
ALAD	11745830_a_at	1.4197	0.017
PTTG1	11717521_x_at	1.4162	0.0208
ASTN2	11724347_a_at	1.4155	0.0366
CAMK2N1	11719242_s_at	1.4155	0.0401
MREG	11743881_s_at	1.4152	0.0219
POR	11716114_x_at	1.4133	0.02
UBE4B	11720501_a_at	1.4132	0.0328
DDX39	11733198_a_at	1.4132	0.0328
ELOVL4	11726590_at	1.4128	0.0341
GRHL1	11727556_a_at	1.4123	0.0323
INF2	11736440_at	1.4116	0.0365
RHOJ	11759345_at	1.4114	0.0491
TMEM51	11727254_a_at	1.4104	0.0301
GGH	11722818_a_at	1.4104	0.0476
KLHDC8B	11717613_a_at	1.4097	0.0328
C15orf5	11745030_at	1.4093	0.0441
NUSAP1	11742735_a_at	1.4089	0.017
IFIH1	11724346_a_at	1.4081	0.0204
C21orf34	11740758_a_at	1.4063	0.0471
CGREF1	11728528_a_at	1.4058	0.0204
WHSC1	11744764_s_at	1.4047	0.0312
TIAM2	11737763_a_at	1.4044	0.0374
ZNF616	11725872_s_at	1.4044	0.0415
PIM1	11717257_s_at	1.4037	0.0234
EDEM2	11719374_a_at	1.4028	0.0415
C1orf51	11722950_a_at	1.4025	0.0218
SLC43A3	11716847_a_at	1.4023	0.023
GSTM2P1	11745706_s_at	1.4023	0.0248
CTSK	11715496_a_at	1.4015	0.0381
KLHDC3	11756252_x_at	1.4012	0.025
PLAT	11747398_a_at	1.4011	0.0378
FAM102B	11722128_at	1.401	0.0409
MICA	11738888_x_at	1.3998	0.0408
TMEM101	11744110_at	1.3987	0.0421
KCNMB2	11750539_a_at	1.3984	0.0174
FBXL5	11721315_s_at	1.3978	0.0203
ZFYVE26	11754428_a_at	1.3965	0.0494
COL6A3	11753972_a_at	1.3963	0.0444
KIAA0415	11722928_a_at	1.3956	0.0256
CASP1	11763186_at	1.3947	0.0153
APOBEC3B	11732902_x_at	1.3944	0.0126
LOC645166	11745569_s_at	1.3942	0.0478
STMN1	11753704_a_at	1.3934	0.0441
HIST1H2AC	11736244_s_at	1.3926	0.0394
PMP22	11728274_a_at	1.3925	0.0447
HAPLN1	11725375_at	1.392	0.0373
CLCN6	11720435_s_at	1.3918	0.0373
CENPA	11758529_s_at	1.3901	0.0057
BMP1	11729026_a_at	1.39	0.0442
FNIP1	11731054_s_at	1.3894	0.0423
HIST1H2AG	11759131_at	1.3893	0.0331
CD99	11754019_x_at	1.3891	0.0402
UROD	11756593_a_at	1.3888	0.0306
CENPE	11754676_a_at	1.3886	0.0284
KIAA1797	11718719_at	1.3876	0.0348
COMP	11750735_a_at	1.3865	0.028
MGST3	11716165_a_at	1.3854	0.0277
FAR2	11758994_at	1.3849	0.0413
SLC38A4	11725512_a_at	1.3832	0.0185
SPRED1	11734827_at	1.3822	0.0442
PHYHD1	11756977_a_at	1.3815	0.0301
MFHAS1	11739395_a_at	1.3815	0.0381
LOC100294376	11730198_s_at	1.3756	0.0433
MAN1C1	11763583_a_at	1.3749	0.0436
DLGAP5	11722367_a_at	1.3726	0.0257
GUK1	11757299_x_at	1.3723	0.0494
ACVR2A	11727164_at	1.3708	0.0415
BOC	11725693_a_at	1.367	0.0371
FKBP1A	11715390_s_at	1.3655	0.0351
DENND3	11720159_a_at	1.364	0.034
GSTA4	11742927_a_at	1.3602	0.047
SPEN	11743665_at	1.3593	0.0402
RALY	11748706_a_at	1.3584	0.0395
ARHGAP6	11728900_a_at	1.3579	0.0494
EWSR1	11756365_a_at	1.3523	0.0406
TTK	11723435_s_at	1.3512	0.0093
HMMR	11758089_s_at	1.3465	0.0207
LPCAT3	11755123_x_at	1.3457	0.041
PLSCR1	11751651_s_at	1.3444	0.0415
HIST2H2AC	11759258_at	1.3417	0.0408
CASC5	11759328_at	1.3207	0.0337
ANGPTL1	11744707_a_at	1.2999	0.0306
CCNB1	11723939_a_at	1.2982	0.0229
ANP32E	11725046_a_at	1.2924	0.0235
TOP2A	11720972_at	1.2618	0.0443
SKA1	11722069_a_at	1.251	0.0287
MKI67	11721143_a_at	1.1838	0.0378
CENPF	11743295_a_at	1.0722	0.0231
