# Supplementary material for: Transcriptome Analysis of Ullrich Congenital Muscular Dystrophy Fibroblasts Reveals a Disease Extracellular Matrix Signature and Key Molecular Regulators
Source: PLoS One. 2015 Dec 15;10(12):e0145107. doi: 10.1371/journal.pone.0145107 (PMC4686057; doi:10.1371/journal.pone.0145107)
Supplement: S4 Table — (XLSX) [file pone.0145107.s004.xlsx]

## Sheet: P-C
Suppl. Table 4	List of enriched GO_BP terms for each main comparison.
	Up-regulated Genes
Category	Term	Count	%	PValue	Genes	List Total	Pop Hits	Pop Total	Fold Enrichment	Bonferroni	Benjamini	FDR
GOTERM_BP_FAT	GO:0007155~cell adhesion	41	10.9626	1.18e-08	PLXNC1, CADM1, EPDR1, PCDHGA9, PCDHGA8, PCDHGA7, PCDHGC5, PCDHGC4, PCDHGA6, PCDHGA5, PCDHGC3, CLDN11, PCDHGA4, PCDHGA3, PCDHGA2, PCDHGA1, CD9, WISP2, RGMB, EZR, CD44, COMP, ROBO2, EMB, SPON2, THBS4, COL18A1, PCDHGA12, PCDHGA10, TNXB, PCDHGA11, TNXA, PDPN, COL13A1, SDK2, PCDH10, CPXM2, ITGA3, JUP, LAMA4, DSG2, ITGA6, CDON, ITGA7, ENG	290	700	13528	2.73226	2.27e-05	2.27e-05	2.02e-05
GOTERM_BP_FAT	GO:0022610~biological adhesion	41	10.9626	1.21e-08	PLXNC1, CADM1, EPDR1, PCDHGA9, PCDHGA8, PCDHGA7, PCDHGC5, PCDHGC4, PCDHGA6, PCDHGA5, PCDHGC3, CLDN11, PCDHGA4, PCDHGA3, PCDHGA2, PCDHGA1, CD9, WISP2, RGMB, EZR, CD44, COMP, ROBO2, EMB, SPON2, THBS4, COL18A1, PCDHGA12, PCDHGA10, TNXB, PCDHGA11, TNXA, PDPN, COL13A1, SDK2, PCDH10, CPXM2, ITGA3, JUP, LAMA4, DSG2, ITGA6, CDON, ITGA7, ENG	290	701	13528	2.72836	2.32e-05	1.16e-05	2.07e-05
GOTERM_BP_FAT	GO:0007156~homophilic cell adhesion	16	4.27807	1.27e-07	PCDHGA12, PCDHGA10, PCDHGA11, CADM1, PCDH10, PCDHGA9, PCDHGA8, PCDHGC5, PCDHGA7, PCDHGA6, PCDHGC4, PCDHGA5, PCDHGC3, PCDHGA4, PCDHGA3, PCDHGA2, PCDHGA1, DSG2, ROBO2	290	131	13528	5.6975	0.000243	8.1e-05	0.000217
GOTERM_BP_FAT	GO:0016337~cell-cell adhesion	22	5.88235	4.94e-07	CADM1, PCDHGA9, PCDHGA8, PCDHGC5, PCDHGA7, PCDHGC4, PCDHGA6, CLDN11, PCDHGC3, PCDHGA5, PCDHGA4, PCDHGA3, PCDHGA2, PCDHGA1, EZR, CD44, ROBO2, PCDHGA12, PCDHGA10, PCDHGA11, COL13A1, PDPN, PCDH10, JUP, DSG2	290	276	13528	3.71834	0.000946	0.000237	0.000844
GOTERM_BP_FAT	GO:0009991~response to extracellular stimulus	16	4.27807	7.81e-05	CAV1, LYN, ADORA2B, LEPR, ASL, TIMP3, FOS, SLC1A2, TNFRSF11B, DUSP1, CD44, ITGA6, JUN, STC1, KLF4, MEST	290	220	13528	3.3926	0.139092	0.0295094	0.133508
GOTERM_BP_FAT	GO:0040007~growth	14	3.74332	0.000154	GINS1, GDF5, MREG, TIMP3, PLAUR, INHBB, NOTCH2, SLC1A2, LY6E, PSEN2, TGFBR3, SEPP1, EMP3, EMP1	290	183	13528	3.56872	0.255716	0.0480302	0.263099
GOTERM_BP_FAT	GO:0008544~epidermis development	14	3.74332	0.000163	NTF3, BTD, MREG, KRT34, ALDH3A2, FOXQ1, CST6, PPL, PSEN2, AHNAK2, RUNX3, KLF4, EMP1, DHCR24	290	184	13528	3.54933	0.268401	0.0436641	0.278392
GOTERM_BP_FAT	GO:0007398~ectoderm development	14	3.74332	0.000351	NTF3, BTD, MREG, KRT34, ALDH3A2, FOXQ1, CST6, PPL, PSEN2, AHNAK2, RUNX3, KLF4, EMP1, DHCR24	290	199	13528	3.28179	0.48975	0.0806669	0.598409
GOTERM_BP_FAT	GO:0019882~antigen processing and presentation	9	2.40642	0.000388	RAET1G, ULBP2, RAET1L, HLA-DPA1, HLA-DPB1, TAPBPL, CD74, HLA-DRA, HLA-F	290	83	13528	5.05825	0.524793	0.0793425	0.661478
GOTERM_BP_FAT	GO:0031668~cellular response to extracellular stimulus	8	2.13904	0.000414	FOS, CAV1, SLC1A2, ADORA2B, LYN, ITGA6, JUN, LEPR	290	64	13528	5.83103	0.548106	0.076358	0.706043
GOTERM_BP_FAT	GO:0042060~wound healing	13	3.47594	0.000831	KLF6, F10, SERPING1, CD40, TIMP3, PLAUR, NOTCH2, CD9, CD44, CD59, SERPINB2, TFPI, ENG	290	191	13528	3.17501	0.797007	0.134945	1.41235
GOTERM_BP_FAT	GO:0001944~vasculature development	15	4.0107	0.00101808	COL18A1, CAV1, PDPN, LEPR, TBX1, ANPEP, ARHGAP22, LAMA4, MEOX2, CD44, JUN, ITGA7, TGFBR3, PLCD1, ENG	290	251	13528	2.78775	0.858248	0.150244	1.72764
GOTERM_BP_FAT	GO:0001568~blood vessel development	14	3.74332	0.00238592	COL18A1, CAV1, LEPR, TBX1, ANPEP, ARHGAP22, LAMA4, MEOX2, CD44, JUN, ITGA7, TGFBR3, PLCD1, ENG	290	245	13528	2.66562	0.989762	0.297026	4.00459
GOTERM_BP_FAT	GO:0001501~skeletal system development	16	4.27807	0.00358456	EBP, COL13A1, ACP5, TBX1, PRELP, HOXC10, TNFRSF11B, HOXC9, OSR2, HOXC11, CLEC3B, ETS2, COMP, PTN, KIAA1217, STC1	290	319	13528	2.33973	0.99898	0.388577	5.95897
GOTERM_BP_FAT	GO:0007517~muscle organ development	12	3.20856	0.00571144	FAM65B, CAV1, FOXL2, SMTN, LY6E, MEOX2, SVIL, ITGA7, LMNA, TGFBR3, TBX1, ENG	290	211	13528	2.65298	0.999983	0.519244	9.33493
GOTERM_BP_FAT	GO:0010033~response to organic substance	27	7.21925	0.00634796	CAV1, LEPR, HMGCS1, ACP5, AQP1, ASL, TIMP3, FOS, TNFRSF11B, SLC1A2, HSPA2, CD44, CASP1, LYN, IRS1, DUSP4, KRT19, GLUL, DUSP1, JUN, HSPB7, FABP3, TGFBR3, CTSC, HSPB3, TJP2, CD14	290	721	13528	1.74688	0.999995	0.533915	10.3229
GOTERM_BP_FAT	GO:0009394~2'-deoxyribonucleotide metabolic process	4	1.06952	0.00965068	TYMS, AK5, NTHL1, DUT	290	21	13528	8.88539	1	0.665163	15.2883
GOTERM_BP_FAT	GO:0031667~response to nutrient levels	11	2.94118	0.00983174	CAV1, TNFRSF11B, DUSP1, CD44, JUN, LEPR, STC1, ASL, TIMP3, KLF4, MEST	290	197	13528	2.60473	1	0.651045	15.5529
GOTERM_BP_FAT	GO:0007584~response to nutrient	9	2.40642	0.0103858	CAV1, TNFRSF11B, DUSP1, CD44, STC1, ASL, TIMP3, KLF4, MEST	290	140	13528	2.99882	1	0.651425	16.3577
GOTERM_BP_FAT	GO:0043065~positive regulation of apoptosis	18	4.81283	0.0111208	COL18A1, FOXL2, CADM1, TIMP3, DAPK1, PRUNE2, NOTCH2, AHRR, DUSP1, CD44, JUN, SCIN, PSEN2, PYCARD, TNFRSF19, CASP1, RUNX3, PHLDA1	290	430	13528	1.95272	1	0.657834	17.4143
GOTERM_BP_FAT	GO:0043068~positive regulation of programmed cell death	18	4.81283	0.0118418	COL18A1, FOXL2, CADM1, TIMP3, DAPK1, PRUNE2, NOTCH2, AHRR, DUSP1, CD44, JUN, SCIN, PSEN2, PYCARD, TNFRSF19, CASP1, RUNX3, PHLDA1	290	433	13528	1.93919	1	0.663111	18.4384
GOTERM_BP_FAT	GO:0010942~positive regulation of cell death	18	4.81283	0.0123506	COL18A1, FOXL2, CADM1, TIMP3, DAPK1, PRUNE2, NOTCH2, AHRR, DUSP1, CD44, JUN, SCIN, PSEN2, PYCARD, TNFRSF19, CASP1, RUNX3, PHLDA1	290	435	13528	1.93027	1	0.661574	19.154
GOTERM_BP_FAT	GO:0006955~immune response	25	6.68449	0.0129549	MASP1, CADM1, OAS3, ACP5, CD74, MBP, RAET1G, RAET1L, HLA-DPB1, SPON2, CCRL1, SECTM1, TCF7, LYN, CNPY3, SERPING1, HLA-F, APOL1, PSEN2, ULBP2, TGFBR3, HLA-DPA1, CTSC, CD14, HLA-DRA	290	690	13528	1.69015	1	0.662902	19.9961
	Down-regulated Genes
Category	Term	Count	%	PValue	Genes	List Total	Pop Hits	Pop Total	Fold Enrichment	Bonferroni	Benjamini	FDR
GOTERM_BP_FAT	GO:0042692~muscle cell differentiation	13	5.62771	9.02e-08	KCNH1, ACTC1, TNC, TBX5, IGF1, CSRP2, TPM1, TCF7L2, FOXP1, GATA6, FOXF1, AGT, ADAM12	185	121	13528	7.85633	0.000166	0.000166	0.000154
GOTERM_BP_FAT	GO:0007517~muscle organ development	16	6.92641	1.88e-07	ACTC1, TBX5, TNC, ELN, IGF1, FKBP1A, CSRP2, TPM1, HOXD10, FOXP1, SGCG, GATA6, SIX1, SGCD, FOXC1, COL11A1	185	211	13528	5.54497	0.000346	0.000173	0.00032
GOTERM_BP_FAT	GO:0014706~striated muscle tissue development	12	5.19481	6.44e-07	ACTC1, GATA6, TNC, TBX5, ELN, SIX1, FKBP1A, FOXC1, COL11A1, TPM1, HOXD10, FOXP1	185	119	13528	7.37388	0.00118742	0.000396	0.00109676
GOTERM_BP_FAT	GO:0060537~muscle tissue development	12	5.19481	1.06e-06	ACTC1, GATA6, TNC, TBX5, ELN, SIX1, FKBP1A, FOXC1, COL11A1, TPM1, HOXD10, FOXP1	185	125	13528	7.01994	0.00194531	0.000487	0.00179745
GOTERM_BP_FAT	GO:0009611~response to wounding	23	9.95671	3.13e-06	CXCL1, NFKBIZ, IL6, IL8, INS-IGF2, C3, TNC, MYH2, CXCL2, EPHX2, IGF1, IGF2, CXCL6, TPM1, EPHA3, IGSF10, TNFAIP6, SAA2, SAA1, CTGF, F3, VCAN, ID3, CFD	185	530	13528	3.17332	0.00575038	0.00115273	0.00532337
GOTERM_BP_FAT	GO:0060348~bone development	11	4.7619	6.74e-06	IGSF10, PTGS2, CTGF, INS-IGF2, IGF1, MGP, IGF2, FOXC1, COL1A1, SOX9, CDH11, HOXD11	185	123	13528	6.53957	0.0123665	0.00207178	0.011486
GOTERM_BP_FAT	GO:0001501~skeletal system development	17	7.35931	7.34e-06	PTGS2, INS-IGF2, IGF1, MGP, IGF2, SOX9, HOXD10, HOXD11, IGSF10, INHBA, ACVR2A, CTGF, SIX1, FOXC1, COL1A1, COL11A1, COL10A1, CDH11	185	319	13528	3.89691	0.0134477	0.00193227	0.0124971
GOTERM_BP_FAT	GO:0050727~regulation of inflammatory response	9	3.8961	8.62e-06	AGTR1, IL6, PTGS2, SAA2, C3, SAA1, INS-IGF2, AGT, TGM2, IGF2	185	76	13528	8.65946	0.0157709	0.0019851	0.0146731
GOTERM_BP_FAT	GO:0035295~tube development	14	6.06061	9.74e-06	TBX5, IGF1, MGP, FOXP1, LGR4, HOXD11, CRISPLD2, GATA6, CTGF, FOXF1, AGT, SIX1, FOXC1, NFIB	185	220	13528	4.65337	0.0178092	0.00199464	0.0165865
GOTERM_BP_FAT	GO:0048738~cardiac muscle tissue development	8	3.4632	1.14e-05	ACTC1, GATA6, TBX5, FKBP1A, FOXC1, COL11A1, TPM1, FOXP1	185	57	13528	10.2631	0.0208868	0.00210858	0.019483
GOTERM_BP_FAT	GO:0051146~striated muscle cell differentiation	9	3.8961	2.56e-05	KCNH1, ACTC1, GATA6, TNC, TBX5, IGF1, ADAM12, TPM1, FOXP1	185	88	13528	7.47862	0.0460755	0.00427907	0.043534
GOTERM_BP_FAT	GO:0007507~heart development	13	5.62771	3.79e-05	ACTC1, TBX5, SOX4, FKBP1A, SOX9, TPM1, FOXP1, GATA6, KCNJ8, FOXC1, ADAM19, ID3, COL11A1	185	215	13528	4.42147	0.0676176	0.00581737	0.0646076
GOTERM_BP_FAT	GO:0002526~acute inflammatory response	9	3.8961	5.58e-05	IL6, SAA2, C3, SAA1, INS-IGF2, F3, EPHX2, IGF2, CFD, EPHA3	185	98	13528	6.7155	0.0977782	0.00788375	0.0949375
GOTERM_BP_FAT	GO:0032101~regulation of response to external stimulus	11	4.7619	6.26e-05	AGTR1, IL6, PTGS2, SAA2, IL8, C3, SAA1, INS-IGF2, F3, AGT, TGM2, IGF2	185	159	13528	5.05892	0.109154	0.008222	0.106639
GOTERM_BP_FAT	GO:0035150~regulation of tube size	7	3.0303	7.88e-05	AGTR1, ACTG2, ACTC1, KCNJ8, AGT, FOXC1, GCH1	185	53	13528	9.65793	0.13531	0.00964546	0.134114
GOTERM_BP_FAT	GO:0050880~regulation of blood vessel size	7	3.0303	7.88e-05	AGTR1, ACTG2, ACTC1, KCNJ8, AGT, FOXC1, GCH1	185	53	13528	9.65793	0.13531	0.00964546	0.134114
GOTERM_BP_FAT	GO:0030198~extracellular matrix organization	9	3.8961	8.52e-05	CRISPLD2, AGT, FOXF1, ELN, FKBP1A, FOXC1, COL1A1, COL11A1, DPT	185	104	13528	6.32807	0.14543	0.00977424	0.144967
GOTERM_BP_FAT	GO:0008283~cell proliferation	18	7.79221	9.53e-05	BCAT1, CXCL1, ELN, UCHL1, IGF1, FKBP1A, ENPEP, CSRP2, TCF7L2, LGR4, GPC4, ACVR2A, STAT4, LAMP3, AGT, FOXC1, ID4, BHLHE41	185	436	13528	3.01889	0.161225	0.0102886	0.162162
GOTERM_BP_FAT	GO:0003018~vascular process in circulatory system	7	3.0303	0.000131	AGTR1, ACTG2, ACTC1, KCNJ8, AGT, FOXC1, GCH1	185	58	13528	8.82535	0.215192	0.0133718	0.223433
GOTERM_BP_FAT	GO:0006954~inflammatory response	15	6.49351	0.000143	CXCL1, NFKBIZ, IL6, IL8, C3, INS-IGF2, CXCL2, EPHX2, IGF2, CXCL6, EPHA3, TNFAIP6, SAA2, SAA1, F3, CFD	185	325	13528	3.37497	0.23226	0.0138145	0.243683
GOTERM_BP_FAT	GO:0042127~regulation of cell proliferation	25	10.8225	0.00017	CXCL1, PTGS2, CXCL5, INS-IGF2, SOX4, PAWR, SOX9, AGTR1, WARS, AGT, BCL11B, ADRA2A, TGM2, DPT, IL6, IL8, TBX5, IGF1, IGF2, FOXP1, CTH, F3, ID4, MAB21L1, NFIB, HTR2A	185	787	13528	2.32288	0.269425	0.0155737	0.289364
GOTERM_BP_FAT	GO:0001503~ossification	9	3.8961	0.000172	IGSF10, PTGS2, CTGF, INS-IGF2, IGF1, MGP, IGF2, FOXC1, COL1A1, CDH11	185	115	13528	5.72277	0.272351	0.0150258	0.293057
GOTERM_BP_FAT	GO:0048729~tissue morphogenesis	11	4.7619	0.000175	ACTC1, TBX5, AGT, FOXF1, SIX1, FKBP1A, FOXC1, COL1A1, COL11A1, TPM1, HOXD11	185	180	13528	4.46871	0.276463	0.0146016	0.298273
GOTERM_BP_FAT	GO:0032103~positive regulation of response to external stimulus	7	3.0303	0.000227	AGTR1, IL6, IL8, C3, F3, AGT, TGM2	185	64	13528	7.99797	0.342708	0.0180792	0.386609
GOTERM_BP_FAT	GO:0008015~blood circulation	11	4.7619	0.00023	AGTR1, ACTG2, ACTC1, PTGS2, KCNJ8, AGT, ELN, EPHX2, FOXC1, TPM1, GCH1	185	186	13528	4.32456	0.345517	0.0175079	0.390548
GOTERM_BP_FAT	GO:0003013~circulatory system process	11	4.7619	0.00023	AGTR1, ACTG2, ACTC1, PTGS2, KCNJ8, AGT, ELN, EPHX2, FOXC1, TPM1, GCH1	185	186	13528	4.32456	0.345517	0.0175079	0.390548
GOTERM_BP_FAT	GO:0043062~extracellular structure organization	10	4.329	0.000387	CRISPLD2, TNC, AGT, FOXF1, ELN, FKBP1A, FOXC1, COL1A1, COL11A1, DPT	185	163	13528	4.48615	0.510479	0.0281688	0.657229
GOTERM_BP_FAT	GO:0030324~lung development	8	3.4632	0.000399	CTGF, GATA6, CRISPLD2, TBX5, FOXF1, MGP, FOXP1, NFIB	185	99	13528	5.90904	0.521044	0.0279163	0.677235
GOTERM_BP_FAT	GO:0008217~regulation of blood pressure	8	3.4632	0.000424	AGTR1, ACTG2, ACTC1, PTGS2, AGT, EPHX2, TPM1, GCH1	185	100	13528	5.84995	0.542791	0.0285697	0.71983
GOTERM_BP_FAT	GO:0060415~muscle tissue morphogenesis	5	2.1645	0.000455	ACTC1, FKBP1A, FOXC1, COL11A1, TPM1	185	27	13528	13.5415	0.568214	0.0295484	0.772247
GOTERM_BP_FAT	GO:0055008~cardiac muscle tissue morphogenesis	5	2.1645	0.000455	ACTC1, FKBP1A, FOXC1, COL11A1, TPM1	185	27	13528	13.5415	0.568214	0.0295484	0.772247
GOTERM_BP_FAT	GO:0030029~actin filament-based process	12	5.19481	0.000462	CXCL1, FMN1, ACTC1, SORBS1, LIMCH1, MYH2, ELN, ADRA2A, FHOD3, CNN1, FGD6, TPM1	185	241	13528	3.64105	0.573646	0.0289682	0.783844
GOTERM_BP_FAT	GO:0030323~respiratory tube development	8	3.4632	0.000478	CTGF, GATA6, CRISPLD2, TBX5, FOXF1, MGP, FOXP1, NFIB	185	102	13528	5.73524	0.586286	0.0289908	0.811402
GOTERM_BP_FAT	GO:0051240~positive regulation of multicellular organismal process	12	5.19481	0.000508	IL6, PTGS2, INS-IGF2, EPHX2, IGF2, TPM1, ACVR2A, SAA2, SAA1, AGT, F3, GPAM, HTR2A	185	244	13528	3.59628	0.608074	0.0297637	0.860927
GOTERM_BP_FAT	GO:0007155~cell adhesion	22	9.52381	0.000552	HAPLN1, EGFL6, TNC, NPNT, MGP, EDIL3, PCDH7, SOX9, AMIGO2, TNFAIP6, WISP1, DAB1, SORBS1, CTGF, CDH18, AGT, VCAN, JAM2, ADAM12, COL11A1, DPT, CDH11	185	700	13528	2.29819	0.638711	0.0313142	0.935388
GOTERM_BP_FAT	GO:0022610~biological adhesion	22	9.52381	0.000562	HAPLN1, EGFL6, TNC, NPNT, MGP, EDIL3, PCDH7, SOX9, AMIGO2, TNFAIP6, WISP1, DAB1, SORBS1, CTGF, CDH18, AGT, VCAN, JAM2, ADAM12, COL11A1, DPT, CDH11	185	701	13528	2.29491	0.645539	0.0309402	0.952833
GOTERM_BP_FAT	GO:0060541~respiratory system development	8	3.4632	0.000675	CTGF, GATA6, CRISPLD2, TBX5, FOXF1, MGP, FOXP1, NFIB	185	108	13528	5.41662	0.712033	0.0359527	1.1426
GOTERM_BP_FAT	GO:0007610~behavior	17	7.35931	0.000676	CXCL1, IL6, EGR2, IL8, PTGS2, CXCL5, UCHL1, CXCL2, CXCL6, HOXD10, EPHA4, SAA2, SAA1, AGT, LHX8, HTR2A, VLDLR	185	469	13528	2.65056	0.712956	0.0350322	1.14553
GOTERM_BP_FAT	GO:0050729~positive regulation of inflammatory response	5	2.1645	0.000688	AGTR1, IL6, C3, AGT, TGM2	185	30	13528	12.1874	0.719313	0.0346766	1.16596
GOTERM_BP_FAT	GO:0048705~skeletal system morphogenesis	8	3.4632	0.000837	CTGF, SIX1, MGP, COL1A1, SOX9, COL11A1, HOXD10, HOXD11	185	112	13528	5.22317	0.786858	0.0409176	1.41679
GOTERM_BP_FAT	GO:0031328~positive regulation of cellular biosynthetic process	21	9.09091	0.00104717	IL6, EGR2, IKZF2, INS-IGF2, TBX5, GDF6, IGF1, SOX4, IGF2, PAWR, SOX9, TCF7L2, HOXD10, INHBA, SORBS1, GATA6, AGT, BCL11B, FOXF1, SIX1, FOXC1, NFIB	185	685	13528	2.24177	0.855292	0.0495973	1.76857
GOTERM_BP_FAT	GO:0030036~actin cytoskeleton organization	11	4.7619	0.0010572	CXCL1, FMN1, ACTC1, SORBS1, LIMCH1, ELN, ADRA2A, FHOD3, CNN1, FGD6, TPM1	185	226	13528	3.55915	0.857948	0.0488086	1.78536
GOTERM_BP_FAT	GO:0033860~regulation of NAD(P)H oxidase activity	3	1.2987	0.00108433	AGTR1, INS-IGF2, AGT, IGF2	185	4	13528	54.8432	0.864892	0.0488105	1.83079
GOTERM_BP_FAT	GO:0043066~negative regulation of apoptosis	14	6.06061	0.00111682	IL6, INS-IGF2, IGF1, SOX4, ASNS, IGF2, TCF7L2, AMIGO2, ATF5, KRT18, BCL11B, AGT, F3, TGM2, FOXC1	185	354	13528	2.89192	0.872761	0.0490417	1.88515
GOTERM_BP_FAT	GO:0009891~positive regulation of biosynthetic process	21	9.09091	0.00124786	IL6, EGR2, IKZF2, INS-IGF2, TBX5, GDF6, IGF1, SOX4, IGF2, PAWR, SOX9, TCF7L2, HOXD10, INHBA, SORBS1, GATA6, AGT, BCL11B, FOXF1, SIX1, FOXC1, NFIB	185	695	13528	2.20951	0.900115	0.0533737	2.10413
GOTERM_BP_FAT	GO:0043069~negative regulation of programmed cell death	14	6.06061	0.00126763	IL6, INS-IGF2, IGF1, SOX4, ASNS, IGF2, TCF7L2, AMIGO2, ATF5, KRT18, BCL11B, AGT, F3, TGM2, FOXC1	185	359	13528	2.85164	0.903698	0.0529702	2.13713
GOTERM_BP_FAT	GO:0060548~negative regulation of cell death	14	6.06061	0.00129974	IL6, INS-IGF2, IGF1, SOX4, ASNS, IGF2, TCF7L2, AMIGO2, ATF5, KRT18, BCL11B, AGT, F3, TGM2, FOXC1	185	360	13528	2.84372	0.909245	0.0530757	2.19071
GOTERM_BP_FAT	GO:0010604~positive regulation of macromolecule metabolic process	24	10.3896	0.00136693	INS-IGF2, GDF6, SOX4, FKBP1A, PAWR, SOX9, TCF7L2, HOXD10, AGTR1, SORBS1, GATA6, FOXF1, BCL11B, AGT, IL6, IKZF2, EGR2, TBX5, IGF1, IGF2, ACVR2A, INHBA, SIX1, FOXC1, NFIB	185	857	13528	2.04782	0.919839	0.054539	2.30272
GOTERM_BP_FAT	GO:0010557~positive regulation of macromolecule biosynthetic process	20	8.65801	0.00148272	IL6, EGR2, IKZF2, INS-IGF2, TBX5, GDF6, IGF1, SOX4, IGF2, PAWR, SOX9, TCF7L2, HOXD10, INHBA, SORBS1, GATA6, BCL11B, FOXF1, SIX1, FOXC1, NFIB	185	654	13528	2.23622	0.935278	0.0577778	2.49547
GOTERM_BP_FAT	GO:0045944~positive regulation of transcription from RNA polymerase II promoter	14	6.06061	0.00170009	IL6, EGR2, IKZF2, TBX5, IGF1, SOX9, TCF7L2, HOXD10, INHBA, GATA6, BCL11B, SIX1, FOXC1, NFIB	185	371	13528	2.75941	0.956689	0.0646126	2.85634
GOTERM_BP_FAT	GO:0042325~regulation of phosphorylation	16	6.92641	0.0017679	DEPDC6, IL6, INS-IGF2, GDF6, IGF1, TRIB3, FKBP1A, IGF2, INHBA, ACVR2A, DAB1, AGT, ADRA2A, PDGFD, PPP1R14A, VLDLR, HTR2A	185	466	13528	2.51071	0.96179	0.0657525	2.96867
GOTERM_BP_FAT	GO:0006952~defense response	19	8.22511	0.00182075	CXCL1, NFKBIZ, IL6, IL8, C3, INS-IGF2, CXCL2, EPHX2, IGF2, CXCL6, EPHA3, GCH1, INHBA, TNFAIP6, ABCC9, SAA2, KCNJ8, SAA1, F3, CFD	185	615	13528	2.25913	0.965346	0.0663179	3.05611
GOTERM_BP_FAT	GO:0048754~branching morphogenesis of a tube	6	2.5974	0.00188243	AGT, FOXF1, SIX1, IGF1, MGP, HOXD11	185	65	13528	6.74994	0.96908	0.067165	3.15808
GOTERM_BP_FAT	GO:0001502~cartilage condensation	4	1.7316	0.00204312	CTGF, MGP, SOX9, COL11A1	185	19	13528	15.3946	0.977026	0.0713175	3.42328
GOTERM_BP_FAT	GO:0051341~regulation of oxidoreductase activity	5	2.1645	0.00206533	AGTR1, ACVR2A, INS-IGF2, AGT, IGF2, GCH1	185	40	13528	9.14054	0.977951	0.0707293	3.45987
GOTERM_BP_FAT	GO:0006953~acute-phase response	5	2.1645	0.00206533	IL6, SAA2, SAA1, INS-IGF2, IGF2, EPHA3	185	40	13528	9.14054	0.977951	0.0707293	3.45987
GOTERM_BP_FAT	GO:0006928~cell motion	16	6.92641	0.0021273	IL6, EGR2, IL8, PTGS2, IGF1, ENPEP, TPM1, EPHA4, DAB1, SAA2, SAA1, CTGF, SIX1, ADRA2A, VCAN, FOXC1	185	475	13528	2.46314	0.980338	0.0714518	3.56193
GOTERM_BP_FAT	GO:0045893~positive regulation of transcription, DNA-dependent	16	6.92641	0.00221493	IL6, EGR2, IKZF2, TBX5, IGF1, SOX4, SOX9, TCF7L2, HOXD10, INHBA, GATA6, BCL11B, FOXF1, SIX1, FOXC1, NFIB	185	477	13528	2.45281	0.983279	0.0729619	3.70606
GOTERM_BP_FAT	GO:0051254~positive regulation of RNA metabolic process	16	6.92641	0.00239922	IL6, EGR2, IKZF2, TBX5, IGF1, SOX4, SOX9, TCF7L2, HOXD10, INHBA, GATA6, BCL11B, FOXF1, SIX1, FOXC1, NFIB	185	481	13528	2.43241	0.988108	0.0774186	4.00852
GOTERM_BP_FAT	GO:0019220~regulation of phosphate metabolic process	16	6.92641	0.00259609	DEPDC6, IL6, INS-IGF2, GDF6, IGF1, TRIB3, FKBP1A, IGF2, INHBA, ACVR2A, DAB1, AGT, ADRA2A, PDGFD, PPP1R14A, VLDLR, HTR2A	185	485	13528	2.41235	0.991737	0.0820782	4.33064
GOTERM_BP_FAT	GO:0051174~regulation of phosphorus metabolic process	16	6.92641	0.00259609	DEPDC6, IL6, INS-IGF2, GDF6, IGF1, TRIB3, FKBP1A, IGF2, INHBA, ACVR2A, DAB1, AGT, ADRA2A, PDGFD, PPP1R14A, VLDLR, HTR2A	185	485	13528	2.41235	0.991737	0.0820782	4.33064
GOTERM_BP_FAT	GO:0030155~regulation of cell adhesion	8	3.4632	0.00267886	DAB1, SAA2, IL8, SAA1, TGM2, EDIL3, COL1A1, TPM1	185	137	13528	4.27003	0.99291	0.0831642	4.46577
GOTERM_BP_FAT	GO:0042981~regulation of apoptosis	22	9.52381	0.00306496	DEPDC6, IL6, PTGS2, INS-IGF2, TBX5, IGF1, SOX4, IGF2, ASNS, PAWR, SOX9, TCF7L2, GCH1, AMIGO2, INHBA, ATF5, KRT18, F3, AGT, BCL11B, TGM2, FOXC1, ID3	185	804	13528	2.00091	0.99653	0.0930312	5.09372
GOTERM_BP_FAT	GO:0055010~ventricular cardiac muscle morphogenesis	4	1.7316	0.00315129	FKBP1A, FOXC1, COL11A1, TPM1	185	22	13528	13.2953	0.997042	0.0939858	5.23359
GOTERM_BP_FAT	GO:0001763~morphogenesis of a branching structure	6	2.5974	0.00332842	AGT, FOXF1, SIX1, IGF1, MGP, HOXD11	185	74	13528	5.929	0.997869	0.0974397	5.51997
GOTERM_BP_FAT	GO:0051216~cartilage development	6	2.5974	0.00332842	CTGF, MGP, COL1A1, SOX9, COL11A1, HOXD11	185	74	13528	5.929	0.997869	0.0974397	5.51997
GOTERM_BP_FAT	GO:0043067~regulation of programmed cell death	22	9.52381	0.00344062	DEPDC6, IL6, PTGS2, INS-IGF2, TBX5, IGF1, SOX4, IGF2, ASNS, PAWR, SOX9, TCF7L2, GCH1, AMIGO2, INHBA, ATF5, KRT18, F3, AGT, BCL11B, TGM2, FOXC1, ID3	185	812	13528	1.9812	0.998269	0.0989946	5.70094
GOTERM_BP_FAT	GO:0055007~cardiac muscle cell differentiation	4	1.7316	0.00358805	ACTC1, GATA6, TBX5, FOXP1	185	23	13528	12.7173	0.998682	0.101443	5.93826
GOTERM_BP_FAT	GO:0042558~pteridine and derivative metabolic process	4	1.7316	0.00358805	MOCOS, MTHFD2, ALDH1L2, GCH1	185	23	13528	12.7173	0.998682	0.101443	5.93826
GOTERM_BP_FAT	GO:0010941~regulation of cell death	22	9.52381	0.00359112	DEPDC6, IL6, PTGS2, INS-IGF2, TBX5, IGF1, SOX4, IGF2, ASNS, PAWR, SOX9, TCF7L2, GCH1, AMIGO2, INHBA, ATF5, KRT18, F3, AGT, BCL11B, TGM2, FOXC1, ID3	185	815	13528	1.97391	0.99869	0.0999976	5.9432
GOTERM_BP_FAT	GO:0046653~tetrahydrofolate metabolic process	3	1.2987	0.00369427	MTHFD2, ALDH1L2, GCH1	185	7	13528	31.339	0.998918	0.101201	6.10889
GOTERM_BP_FAT	GO:0007626~locomotory behavior	11	4.7619	0.00431372	CXCL1, EPHA4, IL6, SAA2, IL8, CXCL5, SAA1, CXCL2, UCHL1, CXCL6, HOXD10	185	274	13528	2.93565	0.999656	0.115478	7.09818
GOTERM_BP_FAT	GO:0008284~positive regulation of cell proliferation	14	6.06061	0.00436535	IL6, PTGS2, CXCL5, INS-IGF2, IGF1, SOX4, IGF2, FOXP1, F3, AGT, ADRA2A, TGM2, ID4, MAB21L1, HTR2A	185	414	13528	2.4728	0.999688	0.115116	7.18018
GOTERM_BP_FAT	GO:0045941~positive regulation of transcription	17	7.35931	0.00439693	IL6, EGR2, IKZF2, TBX5, GDF6, IGF1, SOX4, SOX9, TCF7L2, HOXD10, INHBA, GATA6, BCL11B, FOXF1, SIX1, FOXC1, NFIB	185	564	13528	2.2041	0.999705	0.114273	7.23031
GOTERM_BP_FAT	GO:0007548~sex differentiation	8	3.4632	0.00456508	ACVR2A, INHBA, AGT, FOXC1, SOX9, LHX8, TCF7L2, LGR4	185	151	13528	3.87414	0.999784	0.116748	7.4968
GOTERM_BP_FAT	GO:0042060~wound healing	9	3.8961	0.0046052	IGSF10, IL6, SAA2, SAA1, INS-IGF2, F3, MYH2, IGF1, IGF2, TPM1	185	191	13528	3.44565	0.9998	0.116111	7.56027
GOTERM_BP_FAT	GO:0040012~regulation of locomotion	9	3.8961	0.00476998	IL6, IL8, INS-IGF2, TBX5, F3, AGT, IGF1, IGF2, NEXN, TPM1	185	192	13528	3.4277	0.999852	0.118406	7.82055
GOTERM_BP_FAT	GO:0045935~positive regulation of nucleobase, nucleoside, nucleotide and nucleic acid metabolic process	18	7.79221	0.00502316	IL6, EGR2, IKZF2, INS-IGF2, TBX5, GDF6, IGF1, SOX4, IGF2, SOX9, TCF7L2, HOXD10, INHBA, GATA6, BCL11B, FOXF1, SIX1, FOXC1, NFIB	185	624	13528	2.10936	0.999908	0.12266	8.21912
GOTERM_BP_FAT	GO:0051353~positive regulation of oxidoreductase activity	4	1.7316	0.00511265	AGTR1, INS-IGF2, AGT, IGF2, GCH1	185	26	13528	11.2499	0.999922	0.123087	8.35962
GOTERM_BP_FAT	GO:0010628~positive regulation of gene expression	17	7.35931	0.00582214	IL6, EGR2, IKZF2, TBX5, GDF6, IGF1, SOX4, SOX9, TCF7L2, HOXD10, INHBA, GATA6, BCL11B, FOXF1, SIX1, FOXC1, NFIB	185	581	13528	2.13961	0.999979	0.137205	9.46631
GOTERM_BP_FAT	GO:0001775~cell activation	11	4.7619	0.00592731	IL6, SAA2, IL8, SAA1, INS-IGF2, BCL11B, AGT, BCL11A, SOX4, FKBP1A, IGF2, FOXP1	185	287	13528	2.80267	0.999983	0.13776	9.62928
GOTERM_BP_FAT	GO:0042330~taxis	8	3.4632	0.00623463	CXCL1, IL6, SAA2, IL8, CXCL5, SAA1, CXCL2, CXCL6	185	160	13528	3.65622	0.99999	0.142601	10.1039
GOTERM_BP_FAT	GO:0006935~chemotaxis	8	3.4632	0.00623463	CXCL1, IL6, SAA2, IL8, CXCL5, SAA1, CXCL2, CXCL6	185	160	13528	3.65622	0.99999	0.142601	10.1039
GOTERM_BP_FAT	GO:0031032~actomyosin structure organization	4	1.7316	0.00631519	ACTC1, LIMCH1, CNN1, TPM1	185	28	13528	10.4463	0.999992	0.142553	10.228
GOTERM_BP_FAT	GO:0035051~cardiac cell differentiation	4	1.7316	0.00631519	ACTC1, GATA6, TBX5, FOXP1	185	28	13528	10.4463	0.999992	0.142553	10.228
GOTERM_BP_FAT	GO:0002237~response to molecule of bacterial origin	6	2.5974	0.00631713	IL6, PTGS2, KCNJ8, VLDLR, GCH1, EPHA3	185	86	13528	5.1017	0.999992	0.140879	10.2309
GOTERM_BP_FAT	GO:0051046~regulation of secretion	9	3.8961	0.00642759	AGTR1, INHBA, IL6, SAA2, SAA1, INS-IGF2, AGT, IGF2, TCF7L2, HTR2A	185	202	13528	3.25801	0.999993	0.141465	10.4007
GOTERM_BP_FAT	GO:0043193~positive regulation of gene-specific transcription	6	2.5974	0.00663012	IL6, IKZF2, GATA6, TBX5, IGF1, TCF7L2	185	87	13528	5.04306	0.999995	0.143892	10.7113
GOTERM_BP_FAT	GO:0007010~cytoskeleton organization	14	6.06061	0.00667654	CXCL1, ACTC1, ELN, TPM1, FMN1, SORBS1, SGCG, KRT7, LIMCH1, FHOD3, ADRA2A, SGCD, CNN1, FGD6	185	436	13528	2.34803	0.999996	0.143151	10.7823
GOTERM_BP_FAT	GO:0051173~positive regulation of nitrogen compound metabolic process	18	7.79221	0.00682654	IL6, EGR2, IKZF2, INS-IGF2, TBX5, GDF6, IGF1, SOX4, IGF2, SOX9, TCF7L2, HOXD10, INHBA, GATA6, BCL11B, FOXF1, SIX1, FOXC1, NFIB	185	644	13528	2.04385	0.999997	0.144464	11.0115
GOTERM_BP_FAT	GO:0030199~collagen fibril organization	4	1.7316	0.00697429	FOXC1, COL1A1, COL11A1, DPT	185	29	13528	10.0861	0.999998	0.145699	11.2367
GOTERM_BP_FAT	GO:0040008~regulation of growth	12	5.19481	0.00700784	INS-IGF2, TBX5, IGF1, IGF2, PHF17, INHBA, AGTR1, CTH, WISP1, CTGF, AGT, FOXC1, GPAM	185	341	13528	2.57329	0.999998	0.144719	11.2878
GOTERM_BP_FAT	GO:0007167~enzyme linked receptor protein signaling pathway	12	5.19481	0.00715722	FMOD, INS-IGF2, GDF6, IGF2, FKBP1A, EPHA3, EPHA4, ACVR2A, SORBS1, DOK5, CTGF, FOXC1, ANGPTL1	185	342	13528	2.56577	0.999998	0.145953	11.5148
GOTERM_BP_FAT	GO:0001934~positive regulation of protein amino acid phosphorylation	6	2.5974	0.00728844	ACVR2A, IL6, INS-IGF2, AGT, GDF6, IGF1, IGF2	185	89	13528	4.92973	0.999999	0.146817	11.7137
GOTERM_BP_FAT	GO:0043467~regulation of generation of precursor metabolites and energy	4	1.7316	0.00767273	PPP1R3C, SORBS1, INS-IGF2, IGF1, IGF2	185	30	13528	9.74991	0.999999	0.152311	12.294
GOTERM_BP_FAT	GO:0032925~regulation of activin receptor signaling pathway	3	1.2987	0.00770652	ACVR2A, INHBA, FKBP1A	185	10	13528	21.9373	0.999999	0.151313	12.3449
GOTERM_BP_FAT	GO:0035239~tube morphogenesis	7	3.0303	0.00777095	AGT, FOXF1, SIX1, IGF1, MGP, LGR4, HOXD11	185	127	13528	4.03047	0.999999	0.150886	12.4417
GOTERM_BP_FAT	GO:0045137~development of primary sexual characteristics	7	3.0303	0.00777095	ACVR2A, INHBA, AGT, FOXC1, SOX9, LHX8, LGR4	185	127	13528	4.03047	0.999999	0.150886	12.4417
GOTERM_BP_FAT	GO:0030334~regulation of cell migration	8	3.4632	0.00832263	IL6, INS-IGF2, TBX5, F3, AGT, IGF1, IGF2, NEXN, TPM1	185	169	13528	3.46151	1	0.159075	13.2672
GOTERM_BP_FAT	GO:0048661~positive regulation of smooth muscle cell proliferation	4	1.7316	0.00841102	IL6, PTGS2, TGM2, IGF1	185	31	13528	9.4354	1	0.158993	13.3987
GOTERM_BP_FAT	GO:0045785~positive regulation of cell adhesion	5	2.1645	0.00893233	SAA2, SAA1, TGM2, EDIL3, TPM1	185	60	13528	6.09369	1	0.166327	14.1709
GOTERM_BP_FAT	GO:0001932~regulation of protein amino acid phosphorylation	8	3.4632	0.00939924	ACVR2A, IL6, INS-IGF2, AGT, GDF6, IGF1, FKBP1A, IGF2, PDGFD	185	173	13528	3.38147	1	0.172534	14.857
GOTERM_BP_FAT	GO:0016055~Wnt receptor signaling pathway	7	3.0303	0.00964612	WISP1, DACT1, SFRP2, SOX4, FZD4, TCF7L2, FZD7	185	133	13528	3.84865	1	0.174937	15.2177
GOTERM_BP_FAT	GO:0001822~kidney development	6	2.5974	0.00995086	AGTR1, KCNJ8, AGT, SIX1, FOXC1, HOXD11	185	96	13528	4.57027	1	0.178226	15.6609
GOTERM_BP_FAT	GO:0032583~regulation of gene-specific transcription	7	3.0303	0.00998742	IL6, IKZF2, INS-IGF2, GATA6, TBX5, IGF1, IGF2, TCF7L2	185	134	13528	3.81993	1	0.177117	15.7139
GOTERM_BP_FAT	GO:0006357~regulation of transcription from RNA polymerase II promoter	19	8.22511	0.0102132	IL6, EGR2, IKZF2, TBX5, IGF1, PAWR, SOX9, TCF7L2, HOXD10, FOXP1, INHBA, ATF5, GATA6, BCL11B, SIX1, ID4, FOXC1, ID3, NFIB	185	727	13528	1.91109	1	0.179052	16.0407
GOTERM_BP_FAT	GO:0042327~positive regulation of phosphorylation	6	2.5974	0.010379	ACVR2A, IL6, INS-IGF2, AGT, GDF6, IGF1, IGF2	185	97	13528	4.52315	1	0.179997	16.2799
GOTERM_BP_FAT	GO:0008285~negative regulation of cell proliferation	12	5.19481	0.0104954	CXCL1, WARS, CTH, IL6, PTGS2, IL8, TBX5, BCL11B, AGT, PAWR, DPT, NFIB	185	361	13528	2.43073	1	0.180152	16.4474
GOTERM_BP_FAT	GO:0040017~positive regulation of locomotion	6	2.5974	0.0108197	IL6, IL8, INS-IGF2, F3, AGT, IGF1, IGF2	185	98	13528	4.477	1	0.183508	16.9126
GOTERM_BP_FAT	GO:0019229~regulation of vasoconstriction	4	1.7316	0.0108696	AGTR1, PTGS2, AGT, HTR2A	185	34	13528	8.60286	1	0.182612	16.9839
GOTERM_BP_FAT	GO:0014068~positive regulation of phosphoinositide 3-kinase cascade	3	1.2987	0.0111029	INS-IGF2, AGT, IGF1, IGF2	185	12	13528	18.2811	1	0.1845	17.3168
GOTERM_BP_FAT	GO:0010562~positive regulation of phosphorus metabolic process	6	2.5974	0.011739	ACVR2A, IL6, INS-IGF2, AGT, GDF6, IGF1, IGF2	185	100	13528	4.38746	1	0.192324	18.218
GOTERM_BP_FAT	GO:0045937~positive regulation of phosphate metabolic process	6	2.5974	0.011739	ACVR2A, IL6, INS-IGF2, AGT, GDF6, IGF1, IGF2	185	100	13528	4.38746	1	0.192324	18.218
GOTERM_BP_FAT	GO:0042063~gliogenesis	5	2.1645	0.0117709	EGR2, TSPAN2, AGT, IGF1, VCAN	185	65	13528	5.62495	1	0.191115	18.2629
GOTERM_BP_FAT	GO:0001657~ureteric bud development	4	1.7316	0.0117717	AGT, SIX1, FOXC1, HOXD11	185	35	13528	8.35707	1	0.189475	18.264
GOTERM_BP_FAT	GO:0010906~regulation of glucose metabolic process	4	1.7316	0.0117717	PPP1R3C, SORBS1, INS-IGF2, IGF1, IGF2	185	35	13528	8.35707	1	0.189475	18.264
GOTERM_BP_FAT	GO:0007519~skeletal muscle tissue development	5	2.1645	0.0124003	TNC, ELN, SIX1, HOXD10, FOXP1	185	66	13528	5.53972	1	0.196882	19.1451
GOTERM_BP_FAT	GO:0060538~skeletal muscle organ development	5	2.1645	0.0124003	TNC, ELN, SIX1, HOXD10, FOXP1	185	66	13528	5.53972	1	0.196882	19.1451
GOTERM_BP_FAT	GO:0040007~growth	8	3.4632	0.0125349	IGSF10, INHBA, PTGS2, GDF6, IGF1, FOXC1, CSRP2, HOXD11	185	183	13528	3.19669	1	0.197126	19.3325
GOTERM_BP_FAT	GO:0014066~regulation of phosphoinositide 3-kinase cascade	3	1.2987	0.0130052	INS-IGF2, AGT, IGF1, IGF2	185	13	13528	16.8748	1	0.202058	19.9843

## Sheet: PAA-P
	Up-regulated Genes
Category	Term	Count	%	PValue	Genes	List Total	Pop Hits	Pop Total	Fold Enrichment	Bonferroni	Benjamini	FDR
GOTERM_BP_FAT	GO:0000280~nuclear division	36	12.0401	3.3e-24	NEK2, ANLN, CEP55, PTTG1, SPC24, FAM83D, KIF2C, SPC25, NCAPH, NCAPG, OIP5, BUB1, SKA1, ZWILCH, CCNA2, CDCA5, ASPM, CDK1, DLGAP5, KIF15, CENPF, NUSAP1, BIRC5, CENPE, NDC80, PBK, CDC25C, UBE2C, CDC27, SMC2, SMC4, CCNB1, SPAG5, C14ORF106, BUB1B, CIT	232	220	13528	9.54169	5.42e-21	5.42e-21	5.55e-21
GOTERM_BP_FAT	GO:0007067~mitosis	36	12.0401	3.3e-24	NEK2, ANLN, CEP55, PTTG1, SPC24, FAM83D, KIF2C, SPC25, NCAPH, NCAPG, OIP5, BUB1, SKA1, ZWILCH, CCNA2, CDCA5, ASPM, CDK1, DLGAP5, KIF15, CENPF, NUSAP1, BIRC5, CENPE, NDC80, PBK, CDC25C, UBE2C, CDC27, SMC2, SMC4, CCNB1, SPAG5, C14ORF106, BUB1B, CIT	232	220	13528	9.54169	5.42e-21	5.42e-21	5.55e-21
GOTERM_BP_FAT	GO:0000087~M phase of mitotic cell cycle	36	12.0401	6.17e-24	NEK2, ANLN, CEP55, PTTG1, SPC24, FAM83D, KIF2C, SPC25, NCAPH, NCAPG, OIP5, BUB1, SKA1, ZWILCH, CCNA2, CDCA5, ASPM, CDK1, DLGAP5, KIF15, CENPF, NUSAP1, BIRC5, CENPE, NDC80, PBK, CDC25C, UBE2C, CDC27, SMC2, SMC4, CCNB1, SPAG5, C14ORF106, BUB1B, CIT	232	224	13528	9.37131	1.01e-20	5.06e-21	1.04e-20
GOTERM_BP_FAT	GO:0048285~organelle fission	36	12.0401	1.32e-23	NEK2, ANLN, CEP55, PTTG1, SPC24, FAM83D, KIF2C, SPC25, NCAPH, NCAPG, OIP5, BUB1, SKA1, ZWILCH, CCNA2, CDCA5, ASPM, CDK1, DLGAP5, KIF15, CENPF, NUSAP1, BIRC5, CENPE, NDC80, PBK, CDC25C, UBE2C, CDC27, SMC2, SMC4, CCNB1, SPAG5, C14ORF106, BUB1B, CIT	232	229	13528	9.16669	2.17e-20	7.24e-21	2.22e-20
GOTERM_BP_FAT	GO:0000279~M phase	41	13.7124	4.52e-23	PRC1, NEK2, TTK, ANLN, PTTG1, CEP55, SPC24, FAM83D, KIF2C, SPC25, NCAPH, NCAPG, OIP5, BUB1, SKA1, ZWILCH, CCNA2, CDCA5, ASPM, CDK1, MKI67, SGOL2, DLGAP5, KIF15, CENPF, NUSAP1, BIRC5, CENPE, NDC80, ILF3, PBK, CDC25C, UBE2C, CDC27, SMC2, SMC4, CCNB1, SPAG5, C14ORF106, BUB1B, CIT	232	329	13528	7.26664	7.42e-20	1.85e-20	7.59e-20
GOTERM_BP_FAT	GO:0000278~mitotic cell cycle	43	14.3813	4.93e-23	PRC1, NEK2, DBF4, TTK, ANLN, PTTG1, CEP55, SPC24, FAM83D, KIF2C, SPC25, NCAPH, NCAPG, CENPA, CDKN2C, OIP5, BUB1, SKA1, ZWILCH, CCNA2, CDCA5, ASPM, CDK1, DLGAP5, KIF15, CENPF, NUSAP1, CDK6, BIRC5, CENPE, NDC80, PBK, CDKN3, CDC25C, UBE2C, CDC27, SMC2, SMC4, CCNB1, SPAG5, C14ORF106, BUB1B, CIT	232	370	13528	6.77661	8.08e-20	1.62e-20	8.28e-20
GOTERM_BP_FAT	GO:0022403~cell cycle phase	45	15.0502	5.91e-23	PRC1, NEK2, DBF4, TTK, ANLN, PTTG1, CEP55, SPC24, FAM83D, KIF2C, SPC25, NCAPH, NCAPG, CDKN2C, OIP5, BUB1, SKA1, ZWILCH, CCNA2, CDCA5, ASPM, CDK1, MKI67, SGOL2, DLGAP5, KIF15, CENPF, NUSAP1, CDK6, BIRC5, CENPE, NDC80, ILF3, PBK, CDKN3, CDC25C, UBE2C, CDC27, SMC2, SMC4, CCNB1, SPAG5, C14ORF106, BUB1B, CIT	232	414	13528	6.33808	9.7e-20	1.62e-20	9.93e-20
GOTERM_BP_FAT	GO:0022402~cell cycle process	49	16.388	7.75e-21	GAS2L3, PRC1, DBF4, TTK, PTTG1, FAM83D, KIF2C, OIP5, CDKN2C, CCNA2, CDCA5, ASPM, CDK1, SGOL2, KIF15, NUSAP1, CDK6, PBK, UBE2C, SPAG5, C14ORF106, BUB1B, NEK2, ANLN, CEP55, SPC24, PLAGL1, SPC25, NCAPH, NCAPG, CENPA, BUB1, SKA1, ZWILCH, MKI67, DLGAP5, CENPF, BIRC5, ILF3, NDC80, CENPE, CDC25C, CDKN3, RACGAP1, SMC2, CDC27, SMC4, CCNB1, CIT	232	565	13528	5.057	1.27e-17	1.82e-18	1.3e-17
GOTERM_BP_FAT	GO:0007049~cell cycle	56	18.7291	3.48e-20	GAS2L3, PRC1, C13ORF15, DBF4, TTK, PTTG1, FAM83D, KIF2C, OIP5, CDKN2C, CDCA5, CCNA2, ASPM, ESCO1, CDK1, PDPN, SGOL2, KIF15, NUSAP1, CDK6, PBK, UBE2C, ESCO2, AHR, SPAG5, C14ORF106, BUB1B, NEK2, ANLN, CEP55, SPC24, PLAGL1, SPC25, NCAPH, NCAPG, CENPA, BUB1, SKA1, ZWILCH, CKAP2, UPF1, MKI67, DLGAP5, CENPF, BIRC5, ILF3, NDC80, CENPE, RACGAP1, CDKN3, CDC25C, CDC27, SMC2, SMC4, CCNB1, CIT	232	776	13528	4.20796	5.71e-17	7.14e-18	5.85e-17
GOTERM_BP_FAT	GO:0051301~cell division	35	11.7057	5.89e-19	PRC1, NEK2, ANLN, CEP55, PTTG1, SPC24, FAM83D, SPC25, NCAPH, NCAPG, OIP5, BUB1, SKA1, ZWILCH, CCNA2, CDCA5, ASPM, CDK1, SGOL2, CENPF, NUSAP1, CDK6, BIRC5, CENPE, NDC80, RACGAP1, UBE2C, CDC25C, SMC2, SMC4, CCNB1, SPAG5, C14ORF106, BUB1B, CIT	232	295	13528	6.91818	9.67e-16	1.07e-16	9.9e-16
GOTERM_BP_FAT	GO:0007059~chromosome segregation	17	5.68562	3.9e-13	NEK2, SGOL2, DLGAP5, NUSAP1, CENPF, NDC80, CENPE, BIRC5, PTTG1, SMC2, SMC4, SPC25, NCAPH, NCAPG, SKA1, CDCA5, TOP2A	232	81	13528	12.238	6.4e-10	6.4e-11	6.55e-10
GOTERM_BP_FAT	GO:0000070~mitotic sister chromatid segregation	10	3.34448	6.66e-09	NCAPH, NEK2, NCAPG, DLGAP5, NUSAP1, CENPE, NDC80, CDCA5, SMC2, SMC4	232	36	13528	16.1973	1.09e-05	9.93e-07	1.12e-05
GOTERM_BP_FAT	GO:0000819~sister chromatid segregation	10	3.34448	8.67e-09	NCAPH, NEK2, NCAPG, DLGAP5, NUSAP1, CENPE, NDC80, CDCA5, SMC2, SMC4	232	37	13528	15.7596	1.42e-05	1.18e-06	1.46e-05
GOTERM_BP_FAT	GO:0007346~regulation of mitotic cell cycle	16	5.35117	4.9e-08	CDK1, NEK2, DLGAP5, CENPF, NUSAP1, IGF1, TTK, CENPE, ANLN, BIRC5, UBE2C, CDC25C, BUB1, BUB1B, ZWILCH, CCNA2	232	152	13528	6.13793	8.03e-05	6.18e-06	8.22e-05
GOTERM_BP_FAT	GO:0051726~regulation of cell cycle	22	7.35786	2.42e-07	CDK1, NEK2, C13ORF15, DLGAP5, CENPF, TTK, NUSAP1, IGF1, CDK6, CENPE, ANLN, BIRC5, UBE2C, CDC25C, CDKN3, CCNB1, DIRAS3, CDKN2C, BUB1, BUB1B, ZWILCH, CCNA2	232	331	13528	3.87561	0.000397	2.84e-05	0.000407
GOTERM_BP_FAT	GO:0030199~collagen fibril organization	8	2.67559	4.38e-07	COL14A1, COL3A1, COL12A1, COL1A1, COL5A2, COL11A1, COL5A1, DPT	232	29	13528	16.0856	0.000718	4.79e-05	0.000736
GOTERM_BP_FAT	GO:0030198~extracellular matrix organization	12	4.01338	1.57e-06	CSGALNACT1, COL14A1, ELN, COL3A1, PDGFRA, COL12A1, COL1A1, COL5A2, COL11A1, COL5A1, DPT, EMILIN1	232	104	13528	6.72812	0.00256891	0.000161	0.00263408
GOTERM_BP_FAT	GO:0007076~mitotic chromosome condensation	6	2.00669	1.6e-06	NCAPH, NCAPG, NUSAP1, CDCA5, SMC2, SMC4	232	13	13528	26.9125	0.00262104	0.000154	0.0026876
GOTERM_BP_FAT	GO:0030261~chromosome condensation	7	2.34114	3.14e-06	NCAPH, NCAPG, NUSAP1, CDCA5, TOP2A, SMC2, SMC4	232	25	13528	16.3269	0.00512857	0.000286	0.00526536
GOTERM_BP_FAT	GO:0010564~regulation of cell cycle process	12	4.01338	3.9e-06	NEK2, DLGAP5, BUB1, CENPF, IGF1, NUSAP1, TTK, BIRC5, ANLN, CENPE, CDC25C, UBE2C	232	114	13528	6.13793	0.00636932	0.000336	0.00654325
GOTERM_BP_FAT	GO:0051783~regulation of nuclear division	9	3.01003	4.49e-06	NEK2, DLGAP5, BUB1, CENPF, IGF1, NUSAP1, TTK, CENPE, CDC25C	232	56	13528	9.37131	0.00733541	0.000368	0.00753934
GOTERM_BP_FAT	GO:0007088~regulation of mitosis	9	3.01003	4.49e-06	NEK2, DLGAP5, BUB1, CENPF, IGF1, NUSAP1, TTK, CENPE, CDC25C	232	56	13528	9.37131	0.00733541	0.000368	0.00753934
GOTERM_BP_FAT	GO:0007017~microtubule-based process	17	5.68562	7.17e-06	KIF14, PRC1, NEK2, KIF15, TTK, NUSAP1, NDC80, CENPE, UBE2C, WNT2, SPC25, KIF2C, CENPA, SPAG5, BUB1B, MAP7, KIF20A	232	253	13528	3.91809	0.0116854	0.00056	0.0120364
GOTERM_BP_FAT	GO:0007093~mitotic cell cycle checkpoint	8	2.67559	7.38e-06	CDK1, BUB1, BUB1B, CENPF, TTK, CENPE, ZWILCH, CCNA2	232	43	13528	10.8484	0.0120303	0.00055	0.0123937
GOTERM_BP_FAT	GO:0000226~microtubule cytoskeleton organization	13	4.34783	8.13e-06	PRC1, NEK2, NUSAP1, TTK, NDC80, UBE2C, WNT2, SPC25, KIF2C, CENPA, SPAG5, BUB1B, MAP7	232	147	13528	5.1567	0.0132415	0.000579	0.0136498
GOTERM_BP_FAT	GO:0043062~extracellular structure organization	13	4.34783	2.32e-05	TNC, COL3A1, ELN, COL5A2, COL5A1, EMILIN1, CSGALNACT1, COL14A1, PDGFRA, COL12A1, COL1A1, COL11A1, DPT	232	163	13528	4.65052	0.0373155	0.00158331	0.0389371
GOTERM_BP_FAT	GO:0031577~spindle checkpoint	5	1.67224	3.68e-05	BUB1, CENPF, TTK, BIRC5, CENPE	232	12	13528	24.296	0.0585994	0.00241255	0.0618206
GOTERM_BP_FAT	GO:0033043~regulation of organelle organization	14	4.68227	9.15e-05	NEK2, DLGAP5, ELN, CENPF, NUSAP1, IGF1, TTK, CENPE, CDC25C, WNT2, PLA2G4A, TMSB15A, BUB1, SKA1	232	217	13528	3.76196	0.139363	0.00575579	0.153577
GOTERM_BP_FAT	GO:0050000~chromosome localization	5	1.67224	9.75e-05	DLGAP5, CENPF, BIRC5, CENPE, CDCA5	232	15	13528	19.4368	0.147803	0.00590608	0.163652
GOTERM_BP_FAT	GO:0051303~establishment of chromosome localization	5	1.67224	9.75e-05	DLGAP5, CENPF, BIRC5, CENPE, CDCA5	232	15	13528	19.4368	0.147803	0.00590608	0.163652
GOTERM_BP_FAT	GO:0007051~spindle organization	7	2.34114	0.000108	SPC25, PRC1, SPAG5, BUB1B, TTK, NDC80, UBE2C	232	45	13528	9.0705	0.16289	0.00632989	0.181913
GOTERM_BP_FAT	GO:0048015~phosphoinositide-mediated signaling	9	3.01003	0.000127	EDNRA, EDNRB, PTGER3, SPAG5, BUB1B, IGF1, NDC80, UBE2C, TOP2A	232	88	13528	5.96356	0.188233	0.00716529	0.213332
GOTERM_BP_FAT	GO:0000075~cell cycle checkpoint	9	3.01003	0.000161	CDK1, BUB1, BUB1B, CENPF, TTK, BIRC5, CENPE, ZWILCH, CCNA2	232	91	13528	5.76696	0.231966	0.0087588	0.269908
GOTERM_BP_FAT	GO:0051656~establishment of organelle localization	8	2.67559	0.00017	CENPA, DLGAP5, CENPF, NUSAP1, BIRC5, CENPE, NDC80, CDCA5	232	69	13528	6.76062	0.242848	0.00893375	0.28448
GOTERM_BP_FAT	GO:0051640~organelle localization	9	3.01003	0.000174	CENPA, DLGAP5, CENPF, NUSAP1, BIRC5, CENPE, NDC80, CDCA5, ASPM	232	92	13528	5.70427	0.247888	0.0088627	0.291301
GOTERM_BP_FAT	GO:0008283~cell proliferation	20	6.68896	0.000178	MKI67, PDPN, DLGAP5, ELN, KIF15, CENPF, IGF1, IFI16, CDC25C, RACGAP1, CSRP2, CDC27, EDNRA, CSGALNACT1, ACVR2A, KIF2C, INSIG1, BUB1, BUB1B, ASPM	232	436	13528	2.67479	0.252917	0.00879681	0.29815
GOTERM_BP_FAT	GO:0051329~interphase of mitotic cell cycle	9	3.01003	0.000378	CCNB1, CDKN2C, DBF4, CENPF, CDK6, BIRC5, CDKN3, CDC25C, CDCA5	232	103	13528	5.09508	0.462002	0.0180672	0.632808
GOTERM_BP_FAT	GO:0001501~skeletal system development	16	5.35117	0.000385	COL3A1, PRRX1, IGF1, SPARC, WWTR1, COL5A2, IGSF10, SHOX2, ACVR2A, OSR2, PDGFRA, COL12A1, KIAA1217, COL1A1, COL11A1, COL10A1	232	319	13528	2.92466	0.467831	0.0178612	0.643891
GOTERM_BP_FAT	GO:0051325~interphase	9	3.01003	0.000459	CCNB1, CDKN2C, DBF4, CENPF, CDK6, BIRC5, CDKN3, CDC25C, CDCA5	232	106	13528	4.95088	0.528911	0.0206915	0.767859
GOTERM_BP_FAT	GO:0030071~regulation of mitotic metaphase/anaphase transition	5	1.67224	0.000476	DLGAP5, BUB1, CENPF, TTK, CENPE	232	22	13528	13.2524	0.541775	0.0208709	0.79599
GOTERM_BP_FAT	GO:0007010~cytoskeleton organization	19	6.35452	0.000503	PRC1, NEK2, ELN, TTK, NUSAP1, NDC80, ANLN, UBE2C, RACGAP1, WNT2, KIF2C, SPC25, TMSB15A, CENPA, SPAG5, BUB1B, MAP7, WIPF1, FGD6	232	436	13528	2.54105	0.561839	0.0214809	0.841466
GOTERM_BP_FAT	GO:0007094~mitotic cell cycle spindle assembly checkpoint	4	1.33779	0.000733	BUB1, CENPF, TTK, CENPE	232	11	13528	21.2038	0.699466	0.0303553	1.22358
GOTERM_BP_FAT	GO:0045841~negative regulation of mitotic metaphase/anaphase transition	4	1.33779	0.000733	BUB1, CENPF, TTK, CENPE	232	11	13528	21.2038	0.699466	0.0303553	1.22358
GOTERM_BP_FAT	GO:0006323~DNA packaging	9	3.01003	0.000884	NCAPH, CENPA, NCAPG, HIST2H2AC, NUSAP1, CDCA5, TOP2A, SMC2, SMC4	232	117	13528	4.48541	0.765593	0.0356177	1.47463
GOTERM_BP_FAT	GO:0007155~cell adhesion	25	8.3612	0.000903	PLXNC1, TNC, NPNT, COL3A1, ITGAV, COL12A1, ROBO2, SSX2IP, COL11A1, THBS4, DPT, SPON1, FLRT3, HAPLN1, PDPN, ITGA4, NID2, COL5A1, EMILIN1, OMD, COL14A1, ATP2A2, PKP4, CNTN4, VCAN	232	700	13528	2.08251	0.772709	0.0354896	1.50572
GOTERM_BP_FAT	GO:0022610~biological adhesion	25	8.3612	0.000921	PLXNC1, TNC, NPNT, COL3A1, ITGAV, COL12A1, ROBO2, SSX2IP, COL11A1, THBS4, DPT, SPON1, FLRT3, HAPLN1, PDPN, ITGA4, NID2, COL5A1, EMILIN1, OMD, COL14A1, ATP2A2, PKP4, CNTN4, VCAN	232	701	13528	2.07954	0.77931	0.0353366	1.53545
GOTERM_BP_FAT	GO:0045839~negative regulation of mitosis	4	1.33779	0.000965	BUB1, CENPF, TTK, CENPE	232	12	13528	19.4368	0.794637	0.036144	1.608
GOTERM_BP_FAT	GO:0051784~negative regulation of nuclear division	4	1.33779	0.000965	BUB1, CENPF, TTK, CENPE	232	12	13528	19.4368	0.794637	0.036144	1.608
GOTERM_BP_FAT	GO:0051276~chromosome organization	19	6.35452	0.00170061	NEK2, SGOL2, PTTG3P, DLGAP5, CENPF, NUSAP1, NDC80, CENPE, PTTG1, SMC2, SMC4, NCAPH, NCAPG, CENPA, HIST2H2AC, SETD2, CDCA5, SMARCA2, TOP2A	232	485	13528	2.28432	0.938663	0.0614699	2.81808
GOTERM_BP_FAT	GO:0007052~mitotic spindle organization	4	1.33779	0.00192117	SPC25, PRC1, TTK, NDC80	232	15	13528	15.5494	0.957308	0.0676839	3.17805
GOTERM_BP_FAT	GO:0032964~collagen biosynthetic process	3	1.00334	0.00280631	COL3A1, COL1A1, COL5A1	232	5	13528	34.9862	0.990036	0.0953361	4.61008
GOTERM_BP_FAT	GO:0032268~regulation of cellular protein metabolic process	18	6.02007	0.00325844	CDK1, UPF1, MASP1, IGF1, TTK, NHLRC1, UBE2C, CDC27, LUZP6, EDNRA, CCNB1, EDNRB, ACVR2A, EIF4EBP2, DIO2, ITGAV, MTPN, BUB1B, PDGFD	232	474	13528	2.21432	0.995264	0.107639	5.33386
GOTERM_BP_FAT	GO:0001944~vasculature development	12	4.01338	0.00393833	RTN4, EDNRA, MEOX2, PDPN, PLXDC1, ITGAV, COL3A1, PRRX1, APOLD1, ITGA4, COL1A1, COL5A1	232	251	13528	2.78775	0.998453	0.126131	6.41251
GOTERM_BP_FAT	GO:0031401~positive regulation of protein modification process	10	3.34448	0.00486477	CCNB1, EDNRA, CDK1, ACVR2A, EDNRB, IGF1, TTK, NHLRC1, UBE2C, CDC27	232	187	13528	3.1182	0.999664	0.150594	7.86373
GOTERM_BP_FAT	GO:0000910~cytokinesis	5	1.67224	0.00511317	PRC1, NUSAP1, BIRC5, ANLN, RACGAP1	232	41	13528	7.11102	0.999777	0.154766	8.24923
GOTERM_BP_FAT	GO:0010033~response to organic substance	23	7.69231	0.00602559	AQP9, COL3A1, AQP1, TTC3, WNT2, EDNRA, CYP7B1, DUSP4, ZFP106, PLA2G4A, SLC1A2, EIF4EBP2, PDGFRA, FABP3, WFDC1, GNB4, COL1A1, HSPB3, SETD2, CASP1, PIK3R3, CCNA2, PIK3R1	232	721	13528	1.86011	0.99995	0.176631	9.65224
GOTERM_BP_FAT	GO:0031099~regeneration	6	2.00669	0.00643761	IGSF10, CCNB1, MTPN, IGF1, VCAN, CCNA2, LUZP6	232	69	13528	5.07046	0.999975	0.184284	10.2792
GOTERM_BP_FAT	GO:0019932~second-messenger-mediated signaling	11	3.67893	0.00712787	EDNRA, EDNRB, EIF4EBP2, PTGER3, PTGER4, SPAG5, BUB1B, IGF1, NDC80, UBE2C, TOP2A	232	235	13528	2.72942	0.999992	0.198564	11.3203
GOTERM_BP_FAT	GO:0040001~establishment of mitotic spindle localization	3	1.00334	0.00759603	CENPA, NUSAP1, NDC80	232	8	13528	21.8664	0.999996	0.206717	12.0199
GOTERM_BP_FAT	GO:0010948~negative regulation of cell cycle process	4	1.33779	0.00856589	BUB1, CENPF, TTK, CENPE	232	25	13528	9.32966	0.999999	0.22626	13.4529
GOTERM_BP_FAT	GO:0045840~positive regulation of mitosis	4	1.33779	0.00856589	DLGAP5, IGF1, NUSAP1, CENPE	232	25	13528	9.32966	0.999999	0.22626	13.4529
GOTERM_BP_FAT	GO:0051785~positive regulation of nuclear division	4	1.33779	0.00856589	DLGAP5, IGF1, NUSAP1, CENPE	232	25	13528	9.32966	0.999999	0.22626	13.4529
GOTERM_BP_FAT	GO:0001568~blood vessel development	11	3.67893	0.00948292	RTN4, EDNRA, MEOX2, PLXDC1, ITGAV, COL3A1, PRRX1, APOLD1, ITGA4, COL1A1, COL5A1	232	245	13528	2.61802	1	0.24349	14.7875
GOTERM_BP_FAT	GO:0048146~positive regulation of fibroblast proliferation	4	1.33779	0.00956297	PDGFRA, IGF1, CDK6, CCNA2	232	26	13528	8.97082	1	0.241543	14.9031
GOTERM_BP_FAT	GO:0014829~vascular smooth muscle contraction	3	1.00334	0.00965701	EDNRA, ACTG2, EDNRB	232	9	13528	19.4368	1	0.239962	15.0387
GOTERM_BP_FAT	GO:0048706~embryonic skeletal system development	6	2.00669	0.0101462	ACVR2A, OSR2, PRRX1, KIAA1217, COL1A1, COL11A1	232	77	13528	4.54366	1	0.246834	15.7408
GOTERM_BP_FAT	GO:0051129~negative regulation of cellular component organization	8	2.67559	0.0109971	RTN4, TMSB15A, BUB1, CENPF, TTK, CENPE, TTC3, MBP	232	142	13528	3.28509	1	0.260848	16.949
GOTERM_BP_FAT	GO:0032963~collagen metabolic process	4	1.33779	0.0117524	COL3A1, MMP27, COL1A1, COL5A1	232	28	13528	8.33005	1	0.272279	18.0079
GOTERM_BP_FAT	GO:0051653~spindle localization	3	1.00334	0.0119363	CENPA, NUSAP1, NDC80	232	10	13528	17.4931	1	0.272131	18.2638
GOTERM_BP_FAT	GO:0051293~establishment of spindle localization	3	1.00334	0.0119363	CENPA, NUSAP1, NDC80	232	10	13528	17.4931	1	0.272131	18.2638
GOTERM_BP_FAT	GO:0045596~negative regulation of cell differentiation	10	3.34448	0.0120216	RTN4, ITGAV, IGF1, CDK6, SKI, CNTN4, WWTR1, ASPM, TTC3, MBP	232	216	13528	2.69955	1	0.270094	18.3821
GOTERM_BP_FAT	GO:0031399~regulation of protein modification process	12	4.01338	0.0125983	CCNB1, EDNRA, CDK1, ACVR2A, EDNRB, BUB1B, IGF1, TTK, NHLRC1, PDGFD, UBE2C, CDC27	232	295	13528	2.37195	1	0.277387	19.1786
GOTERM_BP_FAT	GO:0050880~regulation of blood vessel size	5	1.67224	0.0126184	WNT2, EDNRA, ACTG2, EDNRB, GUCY1A3	232	53	13528	5.50098	1	0.27414	19.2062
GOTERM_BP_FAT	GO:0035150~regulation of tube size	5	1.67224	0.0126184	WNT2, EDNRA, ACTG2, EDNRB, GUCY1A3	232	53	13528	5.50098	1	0.27414	19.2062
GOTERM_BP_FAT	GO:0051130~positive regulation of cellular component organization	9	3.01003	0.0126216	WNT2, PLA2G4A, DLGAP5, IGF1, NUSAP1, ROBO2, CENPE, AHR, PIK3R1	232	181	13528	2.89941	1	0.270666	19.2106
GOTERM_BP_FAT	GO:0043588~skin development	4	1.33779	0.0129462	COL3A1, COL1A1, COL5A2, COL5A1	232	29	13528	8.04281	1	0.273095	19.6555
	Down-regulated genes
Category	Term	Count	%	PValue	Genes	List Total	Pop Hits	Pop Total	Fold Enrichment	Bonferroni	Benjamini	FDR
GOTERM_BP_FAT	GO:0009719~response to endogenous stimulus	24	8.60215	2.42e-07	KCNMA1, IRS2, EGR2, CCL2, FHL2, OXTR, TRIM16, ASNS, RCAN1, TIMP3, DDIT3, CDH13, FOS, KRT19, TNFRSF11B, EIF4EBP1, GRB10, DUSP1, BCL2, ALDH2, PEMT, THBS1, NGF, VLDLR	224	405	13528	3.57884	0.000485	0.000485	0.000416
GOTERM_BP_FAT	GO:0007584~response to nutrient	14	5.01792	5.3e-07	CCL2, GDAP1, TRIM16, TIMP3, DDIT3, TNFRSF11B, DOM3Z, DUSP1, TFRC, BCL2, PEMT, STC1, VLDLR, MEST	224	140	13528	6.03929	0.00106377	0.000532	0.000912
GOTERM_BP_FAT	GO:0009991~response to extracellular stimulus	16	5.73477	3.66e-06	CCL2, GDAP1, ASNS, TRIM16, TIMP3, DDIT3, FOS, TNFRSF11B, DOM3Z, DUSP1, TFRC, BCL2, PEMT, STC1, MEST, VLDLR	224	220	13528	4.39221	0.00731487	0.00244426	0.00629177
GOTERM_BP_FAT	GO:0070482~response to oxygen levels	13	4.6595	3.68e-06	KCNMA1, CCL2, EPAS1, OXTR, CITED2, DDIT4, LONP1, TFRC, BCL2, VEGFA, ALDH2, THBS1, VLDLR	224	141	13528	5.56814	0.00735468	0.00184376	0.00632614
GOTERM_BP_FAT	GO:0006563~L-serine metabolic process	5	1.79211	4.78e-06	SHMT2, PHGDH, PSAT1, PSPH, CBS	224	8	13528	37.7455	0.0095425	0.00191583	0.00821696
GOTERM_BP_FAT	GO:0031667~response to nutrient levels	15	5.37634	4.81e-06	CCL2, GDAP1, ASNS, TRIM16, TIMP3, DDIT3, TNFRSF11B, DOM3Z, DUSP1, TFRC, BCL2, PEMT, STC1, VLDLR, MEST	224	197	13528	4.59844	0.00961362	0.00160873	0.0082785
GOTERM_BP_FAT	GO:0009725~response to hormone stimulus	20	7.16846	1.07e-05	KCNMA1, IRS2, EGR2, CCL2, FHL2, OXTR, RCAN1, TRIM16, TIMP3, FOS, KRT19, TNFRSF11B, GRB10, EIF4EBP1, DUSP1, BCL2, ALDH2, THBS1, NGF, VLDLR	224	367	13528	3.29116	0.021279	0.00306794	0.0184314
GOTERM_BP_FAT	GO:0033273~response to vitamin	9	3.22581	1.21e-05	CCL2, DUSP1, TFRC, BCL2, GDAP1, PEMT, TRIM16, TIMP3, MEST	224	66	13528	8.23539	0.0240671	0.00304055	0.0208759
GOTERM_BP_FAT	GO:0008652~cellular amino acid biosynthetic process	8	2.86738	1.88e-05	GOT2, BCAT1, ASS1, PHGDH, ASNS, PSAT1, PSPH, CBS	224	51	13528	9.47339	0.0370554	0.0041867	0.032355
GOTERM_BP_FAT	GO:0010033~response to organic substance	29	10.3943	2.13e-05	CCL2, FHL2, OXTR, TRIM16, ASNS, COMT, TIMP3, GOT2, FOS, TNFRSF11B, EIF4EBP1, DOM3Z, BCL2, PEMT, THBS1, KCNMA1, IRS2, EGR2, RCAN1, DDIT3, CDH13, KRT19, GRB10, TFRC, DUSP1, ID1, ALDH2, VLDLR, NGF	224	721	13528	2.42912	0.0418079	0.00426159	0.0365937
GOTERM_BP_FAT	GO:0006916~anti-apoptosis	14	5.01792	3.73e-05	CCL2, IL31RA, CITED2, ATF5, CDH13, NME5, BDNF, TNFRSF10D, BCL2, F3, VEGFA, THBS1, NGF, HSPA9	224	206	13528	4.10437	0.0720735	0.00677718	0.0640863
GOTERM_BP_FAT	GO:0001666~response to hypoxia	11	3.94265	7.44e-05	KCNMA1, LONP1, CCL2, EPAS1, TFRC, BCL2, VEGFA, THBS1, CITED2, VLDLR, DDIT4	224	134	13528	4.95762	0.138631	0.0123591	0.127812
GOTERM_BP_FAT	GO:0048545~response to steroid hormone stimulus	13	4.6595	8.15e-05	KCNMA1, CCL2, OXTR, RCAN1, TIMP3, FOS, TNFRSF11B, KRT19, DUSP1, BCL2, ALDH2, THBS1, NGF	224	192	13528	4.0891	0.150878	0.0125021	0.140068
GOTERM_BP_FAT	GO:0006412~translation	17	6.09319	0.000122	YARS, AIMP2, SARS, PABPC4, RPL37, EEF2, SARS2, EIF3C, RSL1D1, IARS, WARS, EIF3CL, RPS29, RPL32, EIF2S2, EIF4A1, MARS	224	331	13528	3.10175	0.217677	0.017382	0.210165
GOTERM_BP_FAT	GO:0042493~response to drug	13	4.6595	0.000247	CCL2, OXTR, COMT, SLC47A1, DDIT3, FOS, BDNF, TNFRSF11B, BCL2, PEMT, LOC150786, RAB6A, RAB6C, NGF, BCAR3	224	216	13528	3.63476	0.390499	0.0324689	0.423421
GOTERM_BP_FAT	GO:0032570~response to progesterone stimulus	5	1.79211	0.000283	FOS, CCL2, ALDH2, OXTR, THBS1	224	20	13528	15.0982	0.433354	0.0348785	0.485617
GOTERM_BP_FAT	GO:0015804~neutral amino acid transport	5	1.79211	0.000345	SLC1A4, SLC1A5, SLC6A9, SLC3A2, SLC7A5	224	21	13528	14.3793	0.499765	0.0399267	0.591873
GOTERM_BP_FAT	GO:0009309~amine biosynthetic process	8	2.86738	0.000372	GOT2, BCAT1, ASS1, PHGDH, ASNS, PSAT1, PSPH, CBS	224	81	13528	5.96473	0.526151	0.0406435	0.638029
GOTERM_BP_FAT	GO:0014075~response to amine stimulus	6	2.15054	0.000424	CCL2, PEMT, OXTR, ASNS, TIMP3, DDIT3	224	39	13528	9.29121	0.573375	0.043844	0.727386
GOTERM_BP_FAT	GO:0007611~learning or memory	9	3.22581	0.000495	FOS, BDNF, EGR2, GRIA1, OXTR, COMT, PLCB1, VLDLR, NGF	224	111	13528	4.89672	0.629872	0.0484808	0.848173
GOTERM_BP_FAT	GO:0045765~regulation of angiogenesis	7	2.50896	0.000582	WARS, COL4A2, ID1, F3, SERPINE1, THBS1, FGF2	224	63	13528	6.71032	0.689271	0.0541382	0.996704
GOTERM_BP_FAT	GO:0001101~response to acid	5	1.79211	0.000589	CCL2, BCL2, PEMT, ASNS, TIMP3	224	24	13528	12.5818	0.6937	0.0523607	1.00888
GOTERM_BP_FAT	GO:0009070~serine family amino acid biosynthetic process	4	1.43369	0.000661	PHGDH, PSAT1, PSPH, CBS	224	11	13528	21.961	0.734905	0.0560902	1.13138
GOTERM_BP_FAT	GO:0043066~negative regulation of apoptosis	16	5.73477	0.000795	CCL2, ASNS, IL31RA, CITED2, ATF5, CDH13, NME5, BDNF, CLCF1, TNFRSF10D, BCL2, F3, VEGFA, THBS1, HSPA9, NGF	224	354	13528	2.72962	0.797476	0.0643721	1.35924
GOTERM_BP_FAT	GO:0006564~L-serine biosynthetic process	3	1.07527	0.000803	PHGDH, PSAT1, PSPH	224	3	13528	60.3929	0.80047	0.0624374	1.37183
GOTERM_BP_FAT	GO:0009069~serine family amino acid metabolic process	5	1.79211	0.000808	SHMT2, PHGDH, PSAT1, PSPH, CBS	224	26	13528	11.614	0.802581	0.0604939	1.38082
GOTERM_BP_FAT	GO:0043069~negative regulation of programmed cell death	16	5.73477	0.00091	CCL2, ASNS, IL31RA, CITED2, ATF5, CDH13, NME5, BDNF, CLCF1, TNFRSF10D, BCL2, F3, VEGFA, THBS1, HSPA9, NGF	224	359	13528	2.6916	0.839097	0.0654264	1.55353
GOTERM_BP_FAT	GO:0006418~tRNA aminoacylation for protein translation	6	2.15054	0.00092	IARS, WARS, YARS, SARS, SARS2, MARS	224	46	13528	7.87733	0.842384	0.0638556	1.57094
GOTERM_BP_FAT	GO:0043039~tRNA aminoacylation	6	2.15054	0.00092	IARS, WARS, YARS, SARS, SARS2, MARS	224	46	13528	7.87733	0.842384	0.0638556	1.57094
GOTERM_BP_FAT	GO:0043038~amino acid activation	6	2.15054	0.00092	IARS, WARS, YARS, SARS, SARS2, MARS	224	46	13528	7.87733	0.842384	0.0638556	1.57094
GOTERM_BP_FAT	GO:0060548~negative regulation of cell death	16	5.73477	0.000943	CCL2, ASNS, IL31RA, CITED2, ATF5, CDH13, NME5, BDNF, CLCF1, TNFRSF10D, BCL2, F3, VEGFA, THBS1, HSPA9, NGF	224	360	13528	2.68413	0.849503	0.0632172	1.60992
GOTERM_BP_FAT	GO:0016053~organic acid biosynthetic process	10	3.58423	0.00107376	GOT2, BCAT1, PTGDS, ASS1, FADS3, PHGDH, ASNS, PSAT1, PSPH, CBS	224	155	13528	3.89631	0.884235	0.0693509	1.83091
GOTERM_BP_FAT	GO:0046394~carboxylic acid biosynthetic process	10	3.58423	0.00107376	GOT2, BCAT1, PTGDS, ASS1, FADS3, PHGDH, ASNS, PSAT1, PSPH, CBS	224	155	13528	3.89631	0.884235	0.0693509	1.83091
GOTERM_BP_FAT	GO:0009611~response to wounding	20	7.16846	0.00123021	CXCL1, JUB, CCL2, TNFSF4, PABPC4, CXCL2, CXCL6, MDK, TIMP3, FOS, IL20RB, TFRC, F3, BCL2, SERPINE1, NFE2L1, THBS1, PTX3, FGF2, NGF	224	530	13528	2.27898	0.915461	0.076602	2.09503
GOTERM_BP_FAT	GO:0007167~enzyme linked receptor protein signaling pathway	15	5.37634	0.00162855	IRS2, CCL2, LTBP3, ECSIT, FLNA, IL31RA, FOS, DOK1, GRB10, EIF4EBP1, ID1, VEGFA, GDF15, FGF2, NGF	224	342	13528	2.64881	0.962038	0.0971724	2.76449
GOTERM_BP_FAT	GO:0001938~positive regulation of endothelial cell proliferation	4	1.43369	0.00173684	CDH13, CCL2, F3, VEGFA	224	15	13528	16.1048	0.969465	0.100327	2.94575
GOTERM_BP_FAT	GO:0043627~response to estrogen stimulus	8	2.86738	0.0017467	KCNMA1, KRT19, TNFRSF11B, DUSP1, BCL2, OXTR, RCAN1, TIMP3	224	105	13528	4.60136	0.970064	0.0980505	2.96223
GOTERM_BP_FAT	GO:0001936~regulation of endothelial cell proliferation	5	1.79211	0.00179915	CDH13, CCL2, F3, VEGFA, THBS1	224	32	13528	9.43638	0.97306	0.0981086	3.04988
GOTERM_BP_FAT	GO:0043067~regulation of programmed cell death	26	9.319	0.0019163	CCL2, ASNS, TIMP3, CITED2, IL31RA, ZC3H8, BDNF, CLCF1, BCL2, THBS1, FGF2, HSPA9, KCNMA1, ARHGEF2, CEBPG, DDIT3, CDH13, ATF5, NME5, DUSP1, BBC3, TNFRSF10D, F3, VEGFA, IGFBP3, NGF	224	812	13528	1.93376	0.978714	0.101417	3.24541
GOTERM_BP_FAT	GO:0030334~regulation of cell migration	10	3.58423	0.00195647	JUB, CDH13, IRS2, F3, BCL2, VEGFA, THBS1, IGFBP3, FGF2, CITED2	224	169	13528	3.57354	0.980366	0.100782	3.31237
GOTERM_BP_FAT	GO:0010941~regulation of cell death	26	9.319	0.00201416	CCL2, ASNS, TIMP3, CITED2, IL31RA, ZC3H8, BDNF, CLCF1, BCL2, THBS1, FGF2, HSPA9, KCNMA1, ARHGEF2, CEBPG, DDIT3, CDH13, ATF5, NME5, DUSP1, BBC3, TNFRSF10D, F3, VEGFA, IGFBP3, NGF	224	815	13528	1.92664	0.982517	0.101013	3.40845
GOTERM_BP_FAT	GO:0032526~response to retinoic acid	5	1.79211	0.00202116	DUSP1, TFRC, GDAP1, TRIM16, MEST	224	33	13528	9.15043	0.982761	0.0988804	3.4201
GOTERM_BP_FAT	GO:0043200~response to amino acid stimulus	4	1.43369	0.00253338	CCL2, PEMT, ASNS, TIMP3	224	17	13528	14.2101	0.993848	0.119507	4.2692
GOTERM_BP_FAT	GO:0048514~blood vessel morphogenesis	11	3.94265	0.00264301	CDH13, BGN, EPAS1, ID1, VEGFA, COL15A1, CDH2, MYH9, THBS1, FGF2, CITED2	224	211	13528	3.14844	0.995066	0.121509	4.45
GOTERM_BP_FAT	GO:0042127~regulation of cell proliferation	25	8.96057	0.00267047	CXCL1, CCL2, COMT, MXI1, IL31RA, WARS, BDNF, BCL2, SERPINE1, PEMT, CSK, THBS1, FGF2, IRS2, ARHGEF2, TNFSF4, TBRG4, HES1, CDH13, IL20RB, F3, BNC1, VEGFA, IGFBP3, NGF	224	787	13528	1.91845	0.995331	0.119954	4.49524
GOTERM_BP_FAT	GO:0012501~programmed cell death	21	7.52688	0.0027318	RNF144B, ARHGEF2, FKBP8, YARS, AIMP2, GULP1, TBRG4, TRIB3, DDIT4, LOC652797, TNFRSF11B, BBC3, TNFRSF10D, F3, BCL2, PKM2, SHISA5, SULF1, CYFIP2, THBS1, FGF2, NGF	224	611	13528	2.0757	0.995873	0.119865	4.59621
GOTERM_BP_FAT	GO:0010647~positive regulation of cell communication	14	5.01792	0.00321955	FKBP8, CCL2, OXTR, TRIM16, FLNA, IL31RA, CITED2, CDH13, CLCF1, F3, MIB2, SHISA5, VEGFA, THBS1	224	329	13528	2.56991	0.998454	0.136786	5.3956
GOTERM_BP_FAT	GO:0006399~tRNA metabolic process	8	2.86738	0.00338197	IARS, WARS, YARS, SARS, TRMT1, QTRT1, SARS2, MARS	224	118	13528	4.09443	0.998885	0.140231	5.66041
GOTERM_BP_FAT	GO:0030335~positive regulation of cell migration	7	2.50896	0.00349614	CDH13, IRS2, F3, BCL2, VEGFA, THBS1, FGF2	224	89	13528	4.75	0.999114	0.141703	5.84612
GOTERM_BP_FAT	GO:0042981~regulation of apoptosis	25	8.96057	0.00350673	CCL2, ASNS, TIMP3, IL31RA, CITED2, ZC3H8, BDNF, CLCF1, BCL2, THBS1, HSPA9, KCNMA1, ARHGEF2, CEBPG, DDIT3, CDH13, ATF5, NME5, DUSP1, BBC3, TNFRSF10D, F3, VEGFA, IGFBP3, NGF	224	804	13528	1.87789	0.999133	0.139299	5.86333
GOTERM_BP_FAT	GO:0007613~memory	5	1.79211	0.00376166	GRIA1, OXTR, PLCB1, VLDLR, NGF	224	39	13528	7.74267	0.999481	0.145793	6.27671
GOTERM_BP_FAT	GO:0010243~response to organic nitrogen	6	2.15054	0.00376427	CCL2, PEMT, OXTR, ASNS, TIMP3, DDIT3	224	63	13528	5.7517	0.999484	0.143133	6.28092
GOTERM_BP_FAT	GO:0043434~response to peptide hormone stimulus	9	3.22581	0.0040093	IRS2, EIF4EBP1, GRB10, EGR2, BCL2, OXTR, TRIM16, VLDLR, NGF	224	154	13528	3.52945	0.999685	0.148926	6.67662
GOTERM_BP_FAT	GO:0040012~regulation of locomotion	10	3.58423	0.00458054	JUB, CDH13, IRS2, F3, BCL2, VEGFA, THBS1, IGFBP3, FGF2, CITED2	224	192	13528	3.14546	0.9999	0.165291	7.59298
GOTERM_BP_FAT	GO:0051270~regulation of cell motion	10	3.58423	0.00473987	JUB, CDH13, IRS2, F3, BCL2, VEGFA, THBS1, IGFBP3, FGF2, CITED2	224	193	13528	3.12916	0.999928	0.167545	7.84707
GOTERM_BP_FAT	GO:0007610~behavior	17	6.09319	0.00487335	CXCL1, KCNMA1, EGR2, CCL2, CXCL2, OXTR, CXCL6, COMT, FOS, BDNF, PTGDS, GRIA1, BCL2, PLCB1, FGF2, NGF, VLDLR	224	469	13528	2.18908	0.999945	0.168891	8.05941
GOTERM_BP_FAT	GO:0033189~response to vitamin A	5	1.79211	0.00492622	DUSP1, TFRC, GDAP1, TRIM16, MEST	224	42	13528	7.18963	0.99995	0.167685	8.1434
GOTERM_BP_FAT	GO:0006915~apoptosis	20	7.16846	0.00513624	RNF144B, ARHGEF2, FKBP8, YARS, AIMP2, GULP1, TBRG4, TRIB3, DDIT4, TNFRSF11B, BBC3, TNFRSF10D, F3, BCL2, SHISA5, SULF1, CYFIP2, THBS1, FGF2, NGF	224	602	13528	2.00641	0.999968	0.17131	8.47629
GOTERM_BP_FAT	GO:0046668~regulation of retinal cell programmed cell death	3	1.07527	0.00537926	BDNF, BCL2, FGF2	224	7	13528	25.8827	0.99998	0.175773	8.86008
GOTERM_BP_FAT	GO:0043542~endothelial cell migration	4	1.43369	0.00540001	CDH13, ID1, MYH9, FGF2	224	22	13528	10.9805	0.999981	0.17358	8.89278
GOTERM_BP_FAT	GO:0051272~positive regulation of cell motion	7	2.50896	0.0056069	CDH13, IRS2, F3, BCL2, VEGFA, THBS1, FGF2	224	98	13528	4.31378	0.999987	0.176807	9.21819
GOTERM_BP_FAT	GO:0040017~positive regulation of locomotion	7	2.50896	0.0056069	CDH13, IRS2, F3, BCL2, VEGFA, THBS1, FGF2	224	98	13528	4.31378	0.999987	0.176807	9.21819
GOTERM_BP_FAT	GO:0048872~homeostasis of number of cells	7	2.50896	0.0061804	IL20RB, EPAS1, BCL2, CEBPG, VEGFA, TCEA1, ZC3H8	224	100	13528	4.2275	0.999996	0.190137	10.1145
GOTERM_BP_FAT	GO:0043433~negative regulation of transcription factor activity	5	1.79211	0.00631097	TNFSF4, ID1, CEBPG, FLNA, DDIT3	224	45	13528	6.71032	0.999997	0.19085	10.3175
GOTERM_BP_FAT	GO:0050795~regulation of behavior	5	1.79211	0.00682438	CDH13, PTGDS, F3, VEGFA, THBS1	224	46	13528	6.56444	0.999999	0.201726	11.1111
GOTERM_BP_FAT	GO:0001568~blood vessel development	11	3.94265	0.00746514	CDH13, BGN, EPAS1, ID1, VEGFA, COL15A1, CDH2, MYH9, THBS1, FGF2, CITED2	224	245	13528	2.71152	1	0.215384	12.0924
GOTERM_BP_FAT	GO:0006954~inflammatory response	13	4.6595	0.00769905	CXCL1, CCL2, TNFSF4, CXCL2, CXCL6, FOS, TFRC, IL20RB, F3, NFE2L1, THBS1, PTX3, NGF	224	325	13528	2.41571	1	0.218249	12.448
GOTERM_BP_FAT	GO:0044271~nitrogen compound biosynthetic process	13	4.6595	0.00769905	BCAT1, MOCOS, ASS1, NADSYN1, ASNS, QTRT1, PSPH, GOT2, NME5, PHGDH, NFE2L1, PSAT1, CBS	224	325	13528	2.41571	1	0.218249	12.448
GOTERM_BP_FAT	GO:0001944~vasculature development	11	3.94265	0.00882781	CDH13, BGN, EPAS1, ID1, VEGFA, COL15A1, CDH2, MYH9, THBS1, FGF2, CITED2	224	251	13528	2.6467	1	0.242752	14.1454
GOTERM_BP_FAT	GO:0002040~sprouting angiogenesis	3	1.07527	0.00902324	CDH13, THBS1, FGF2	224	9	13528	20.131	1	0.244121	14.4361
GOTERM_BP_FAT	GO:0043536~positive regulation of blood vessel endothelial cell migration	3	1.07527	0.00902324	VEGFA, THBS1, FGF2	224	9	13528	20.131	1	0.244121	14.4361
GOTERM_BP_FAT	GO:0007568~aging	7	2.50896	0.00970449	FOS, TFRC, BCL2, SERPINE1, LOXL2, TIMP3, DDIT3	224	110	13528	3.84318	1	0.256619	15.4422
GOTERM_BP_FAT	GO:0043392~negative regulation of DNA binding	5	1.79211	0.00980597	TNFSF4, ID1, CEBPG, FLNA, DDIT3	224	51	13528	5.92087	1	0.25561	15.5911
GOTERM_BP_FAT	GO:0009967~positive regulation of signal transduction	12	4.30108	0.00988886	CDH13, FKBP8, CLCF1, MIB2, F3, VEGFA, SHISA5, TRIM16, THBS1, FLNA, IL31RA, CITED2	224	295	13528	2.45666	1	0.254216	15.7126
GOTERM_BP_FAT	GO:0046942~carboxylic acid transport	8	2.86738	0.0109703	GOT2, SLC1A4, SLC1A5, SLC6A9, ABCC3, SLC3A2, SLC7A5, SLC7A11	224	147	13528	3.28669	1	0.274473	17.2822
GOTERM_BP_FAT	GO:0001525~angiogenesis	8	2.86738	0.0113587	CDH13, EPAS1, ID1, VEGFA, COL15A1, MYH9, THBS1, FGF2	224	148	13528	3.26448	1	0.279301	17.8391
GOTERM_BP_FAT	GO:0015849~organic acid transport	8	2.86738	0.0113587	GOT2, SLC1A4, SLC1A5, SLC6A9, ABCC3, SLC3A2, SLC7A5, SLC7A11	224	148	13528	3.26448	1	0.279301	17.8391
GOTERM_BP_FAT	GO:0050921~positive regulation of chemotaxis	4	1.43369	0.0117755	CDH13, F3, VEGFA, THBS1	224	29	13528	8.33005	1	0.284548	18.4328
GOTERM_BP_FAT	GO:0007169~transmembrane receptor protein tyrosine kinase signaling pathway	10	3.58423	0.0120813	DOK1, IRS2, EIF4EBP1, GRB10, CCL2, VEGFA, FGF2, FLNA, IL31RA, NGF	224	224	13528	2.69611	1	0.287388	18.8659
GOTERM_BP_FAT	GO:0030036~actin cytoskeleton organization	10	3.58423	0.012693	CXCL1, ARHGEF2, KRT19, PFN2, TNXB, TNXA, BCL2, CNN2, MYH9, GAS7, FLNA	224	226	13528	2.67225	1	0.296159	19.7256

## Sheet: PAA-CAA
	Up-regulated Genes
Category	Term	Count	%	PValue	Genes	List Total	Pop Hits	Pop Total	Fold Enrichment	Bonferroni	Benjamini	FDR
GOTERM_BP_FAT	GO:0000280~nuclear division	49	11.086	2.41e-31	KIF23, AURKA, PTTG1, FAM83D, KIF2C, OIP5, CDCA2, CDCA5, CCNA2, ASPM, CDCA3, CDK1, CDC6, KIF15, TPX2, NUSAP1, PBK, UBE2C, MAD2L1, TIMELESS, SPAG5, C14ORF106, ZWINT, BUB1B, NEK2, ANLN, CEP55, AURKAPS1, SPC24, SPC25, NCAPH, NCAPG, NCAPG2, BUB1, SKA3, FBXO5, SKA1, ZWILCH, HELLS, DLGAP5, NUF2, KIF18A, CENPF, BIRC5, NDC80, CDC20, SMC2, CDC25B, CCNB1, C21ORF45	347	220	13528	8.68315	5.1e-28	5.1e-28	4.17e-28
GOTERM_BP_FAT	GO:0007067~mitosis	49	11.086	2.41e-31	KIF23, AURKA, PTTG1, FAM83D, KIF2C, OIP5, CDCA2, CDCA5, CCNA2, ASPM, CDCA3, CDK1, CDC6, KIF15, TPX2, NUSAP1, PBK, UBE2C, MAD2L1, TIMELESS, SPAG5, C14ORF106, ZWINT, BUB1B, NEK2, ANLN, CEP55, AURKAPS1, SPC24, SPC25, NCAPH, NCAPG, NCAPG2, BUB1, SKA3, FBXO5, SKA1, ZWILCH, HELLS, DLGAP5, NUF2, KIF18A, CENPF, BIRC5, NDC80, CDC20, SMC2, CDC25B, CCNB1, C21ORF45	347	220	13528	8.68315	5.1e-28	5.1e-28	4.17e-28
GOTERM_BP_FAT	GO:0000087~M phase of mitotic cell cycle	49	11.086	5.82e-31	KIF23, AURKA, PTTG1, FAM83D, KIF2C, OIP5, CDCA2, CDCA5, CCNA2, ASPM, CDCA3, CDK1, CDC6, KIF15, TPX2, NUSAP1, PBK, UBE2C, MAD2L1, TIMELESS, SPAG5, C14ORF106, ZWINT, BUB1B, NEK2, ANLN, CEP55, AURKAPS1, SPC24, SPC25, NCAPH, NCAPG, NCAPG2, BUB1, SKA3, FBXO5, SKA1, ZWILCH, HELLS, DLGAP5, NUF2, KIF18A, CENPF, BIRC5, NDC80, CDC20, SMC2, CDC25B, CCNB1, C21ORF45	347	224	13528	8.5281	1.23e-27	6.15e-28	1.01e-27
GOTERM_BP_FAT	GO:0000279~M phase	57	12.8959	1.55e-30	KIF23, PRC1, TTK, AURKA, PTTG1, FAM83D, KIF2C, OIP5, PSMC3IP, CDCA2, CDCA5, CCNA2, ASPM, CDCA3, CDK1, CDC6, SGOL2, KIF15, TPX2, NUSAP1, PBK, UBE2C, MAD2L1, TIMELESS, SPAG5, ZWINT, C14ORF106, BUB1B, STMN1, NEK2, ANLN, CEP55, AURKAPS1, SPC24, SPC25, NCAPH, HSPA2, NCAPG, NCAPG2, BUB1, SKA3, FBXO5, SKA1, ZWILCH, HELLS, TRIP13, MKI67, DLGAP5, NUF2, KIF18A, CENPF, CDC20, BIRC5, NDC80, SMC2, CDC25B, CCN…	347	329	13528	6.75434	3.27e-27	1.09e-27	2.68e-27
GOTERM_BP_FAT	GO:0048285~organelle fission	49	11.086	1.7e-30	KIF23, AURKA, PTTG1, FAM83D, KIF2C, OIP5, CDCA2, CDCA5, CCNA2, ASPM, CDCA3, CDK1, CDC6, KIF15, TPX2, NUSAP1, PBK, UBE2C, MAD2L1, TIMELESS, SPAG5, C14ORF106, ZWINT, BUB1B, NEK2, ANLN, CEP55, AURKAPS1, SPC24, SPC25, NCAPH, NCAPG, NCAPG2, BUB1, SKA3, FBXO5, SKA1, ZWILCH, HELLS, DLGAP5, NUF2, KIF18A, CENPF, BIRC5, NDC80, CDC20, SMC2, CDC25B, CCNB1, C21ORF45	347	229	13528	8.34189	3.6e-27	9.01e-28	2.95e-27
GOTERM_BP_FAT	GO:0007049~cell cycle	84	19.0045	3.04e-30	GAS2L3, KIF23, STEAP3, PRC1, E2F8, TTK, AURKA, PTTG1, GTSE1, CCNE2, FAM83D, KIF2C, MCM8, CDC45, FANCI, OIP5, PSMC3IP, CDCA2, PSMD5, CDCA5, CCNA2, ASPM, MAP2K6, CDCA3, CDC6, CDK1, SGOL2, KIF15, TPX2, NUSAP1, PBK, MCM3, UBE2C, AHR, ESCO2, CCND1, UHRF1, MAD2L1, TIMELESS, CCND2, SPAG5, ZWINT, C14ORF106, BUB1B, STMN1, CKS1B, NEK2, ANLN, CEP55, CALR, AURKAPS1, SPC24, SPC25, PRUNE2, NCAPH, HSPA2, CENPA,…	347	776	13528	4.22009	6.43e-27	1.29e-27	5.26e-27
GOTERM_BP_FAT	GO:0000278~mitotic cell cycle	59	13.3484	1.2e-29	KIF23, PRC1, TTK, AURKA, PTTG1, GTSE1, FAM83D, KIF2C, OIP5, CDCA2, PSMD5, CDCA5, CCNA2, ASPM, CDCA3, CDC6, CDK1, KIF15, TPX2, NUSAP1, PBK, UBE2C, CCND1, MAD2L1, TIMELESS, CCND2, SPAG5, ZWINT, C14ORF106, BUB1B, STMN1, NEK2, ANLN, CEP55, AURKAPS1, SPC24, SPC25, NCAPH, NCAPG, NCAPG2, CENPA, BUB1, SKA3, FBXO5, SKA1, ZWILCH, HELLS, DLGAP5, NUF2, KIF18A, CENPF, CDC20, BIRC5, NDC80, CDKN3, SMC2, CDC25B,…	347	370	13528	6.21662	2.54e-26	4.23e-27	2.08e-26
GOTERM_BP_FAT	GO:0022403~cell cycle phase	62	14.0271	1.2e-29	KIF23, PRC1, TTK, AURKA, PTTG1, GTSE1, FAM83D, KIF2C, OIP5, PSMC3IP, CDCA2, CDCA5, CCNA2, ASPM, CDCA3, CDC6, CDK1, SGOL2, KIF15, TPX2, NUSAP1, PBK, UBE2C, CCND1, MAD2L1, TIMELESS, CCND2, SPAG5, ZWINT, C14ORF106, BUB1B, STMN1, NEK2, ANLN, CEP55, AURKAPS1, SPC24, SPC25, PRUNE2, NCAPH, HSPA2, NCAPG, NCAPG2, BUB1, FBXO5, SKA3, SKA1, ZWILCH, HELLS, TRIP13, MKI67, DLGAP5, NUF2, KIF18A, CENPF, CDC20, BI…	347	414	13528	5.83842	2.55e-26	3.64e-27	2.08e-26
GOTERM_BP_FAT	GO:0022402~cell cycle process	69	15.6109	1.17e-27	GAS2L3, KIF23, PRC1, TTK, AURKA, PTTG1, GTSE1, FAM83D, KIF2C, OIP5, PSMC3IP, CDCA2, PSMD5, CDCA5, CCNA2, ASPM, MAP2K6, CDCA3, CDC6, CDK1, SGOL2, KIF15, TPX2, NUSAP1, PBK, UBE2C, CCND1, MAD2L1, TIMELESS, CCND2, SPAG5, ZWINT, C14ORF106, BUB1B, STMN1, NEK2, ANLN, CEP55, CALR, AURKAPS1, SPC24, SPC25, PRUNE2, NCAPH, HSPA2, NCAPG, NCAPG2, CENPA, BUB1, FBXO5, SKA3, SKA1, ZWILCH, HELLS, TRIP13, MKI67, DL…	347	565	13528	4.76107	2.48e-24	3.1e-25	2.03e-24
GOTERM_BP_FAT	GO:0051301~cell division	48	10.8597	2.14e-24	KIF23, CKS1B, PRC1, NEK2, ANLN, PTTG1, CEP55, SPC24, FAM83D, CCNE2, SPC25, NCAPH, OIP5, NCAPG2, NCAPG, BUB1, CDCA2, SKA3, FBXO5, SKA1, ZWILCH, CCNA2, CDCA5, HELLS, ASPM, CDCA3, CDK1, CDC6, SGOL2, NUF2, CENPF, NUSAP1, CDC20, BIRC5, NDC80, UBE2C, SMC2, CDC25B, CCNB1, CCND1, MAD2L1, TIMELESS, CCND2, SPAG5, ZWINT, C14ORF106, BUB1B, C21ORF45	347	295	13528	6.34342	4.52e-21	5.02e-22	3.7e-21
GOTERM_BP_FAT	GO:0007059~chromosome segregation	20	4.52489	1.23e-13	NEK2, SGOL2, DLGAP5, NUF2, KIF18A, CENPF, NUSAP1, NDC80, BIRC5, PTTG1, SMC2, SPC25, NCAPH, MAD2L1, NCAPG, ZWINT, SKA3, SKA1, CDCA5, TOP2A	347	81	13528	9.62607	2.6e-10	2.6e-11	2.13e-10
GOTERM_BP_FAT	GO:0051726~regulation of cell cycle	34	7.69231	2.1e-11	CAV2, CKS1B, INS-IGF2, NEK2, TTK, ANLN, CALR, GTSE1, CCNE2, CDC45, DIRAS3, BUB1, FBXO5, ZWILCH, CCNA2, RUNX3, CDC6, CDK1, BMP2, DLGAP5, CENPF, DBC1, NUSAP1, IGF2, BIRC5, UBE2C, CDKN3, CCNB1, CCND1, MAD2L1, TIMELESS, CCND2, ZWINT, JUN, BUB1B	347	331	13528	4.00456	4.44e-08	4.03e-09	3.63e-08
GOTERM_BP_FAT	GO:0006260~DNA replication	24	5.42986	5.99e-10	GINS1, CDC6, GINS2, DTL, GINS3, GINS4, CENPF, C16ORF75, MCM3, RNASEH2A, MCM4, TK1, CCNE2, RFC5, TYMS, RFC3, MCM8, CDC45, POLE2, RRM2, PRIM2, CHAF1A, TOP2A, FEN1	347	190	13528	4.9245	1.27e-06	1.06e-07	1.04e-06
GOTERM_BP_FAT	GO:0007346~regulation of mitotic cell cycle	21	4.75113	1.86e-09	CDC6, CDK1, CAV2, INS-IGF2, NEK2, DLGAP5, CENPF, TTK, NUSAP1, IGF2, ANLN, BIRC5, UBE2C, GTSE1, CCND1, MAD2L1, ZWINT, BUB1, BUB1B, FBXO5, ZWILCH, CCNA2	347	152	13528	5.38617	3.93e-06	3.02e-07	3.21e-06
GOTERM_BP_FAT	GO:0000226~microtubule cytoskeleton organization	20	4.52489	6.43e-09	KIF23, CAV2, CAV1, PRC1, NEK2, KIF18A, TTK, NUSAP1, AURKA, NDC80, UBE2C, AURKAPS1, SPC25, KIF2C, SPAG5, CENPA, ZWINT, BUB1B, FBXO5, MAP7, STMN1	347	147	13528	5.30416	1.36e-05	9.72e-07	1.11e-05
GOTERM_BP_FAT	GO:0006259~DNA metabolic process	38	8.59729	8.36e-09	C16ORF75, PTTG1, TK1, CCNE2, TYMS, CDC45, MCM8, POLE2, FANCI, PRIM2, PSMC3IP, TOP2A, NT5E, HELLS, FEN1, TRIP13, GINS1, GINS2, CDC6, FOXL2, RAD51AP1, DTL, PTTG3P, GINS3, GINS4, PPFIBP1, CENPF, RNASEH2A, MCM3, MCM4, XRCC6BP1, ESCO2, SOD2, RFC5, UHRF1, RFC3, RRM2, CHAF1A	347	506	13528	2.92777	1.77e-05	1.18e-06	1.45e-05
GOTERM_BP_FAT	GO:0007051~spindle organization	12	2.71493	1.22e-08	KIF23, PRC1, TTK, AURKA, NDC80, UBE2C, AURKAPS1, SPC25, SPAG5, ZWINT, FBXO5, BUB1B, STMN1	347	45	13528	10.3962	2.58e-05	1.61e-06	2.11e-05
GOTERM_BP_FAT	GO:0000070~mitotic sister chromatid segregation	11	2.48869	1.48e-08	NCAPH, MAD2L1, NEK2, NCAPG, ZWINT, DLGAP5, KIF18A, NUSAP1, NDC80, CDCA5, SMC2	347	36	13528	11.9123	3.13e-05	1.84e-06	2.56e-05
GOTERM_BP_FAT	GO:0000819~sister chromatid segregation	11	2.48869	1.98e-08	NCAPH, MAD2L1, NEK2, NCAPG, ZWINT, DLGAP5, KIF18A, NUSAP1, NDC80, CDCA5, SMC2	347	37	13528	11.5903	4.19e-05	2.33e-06	3.43e-05
GOTERM_BP_FAT	GO:0000075~cell cycle checkpoint	15	3.39367	7.1e-08	CDK1, CDC6, TTK, CENPF, BIRC5, GTSE1, CCNE2, CCND1, CDC45, MAD2L1, ZWINT, BUB1, BUB1B, ZWILCH, CCNA2	347	91	13528	6.4262	0.00015	7.9e-06	0.000123
GOTERM_BP_FAT	GO:0007093~mitotic cell cycle checkpoint	11	2.48869	9.52e-08	CDK1, CCND1, MAD2L1, ZWINT, BUB1, BUB1B, CENPF, TTK, ZWILCH, CCNA2, GTSE1	347	43	13528	9.97306	0.000201	1.01e-05	0.000165
GOTERM_BP_FAT	GO:0007017~microtubule-based process	24	5.42986	1.42e-07	KIF23, CAV2, CAV1, PRC1, NEK2, TTK, AURKA, GTSE1, AURKAPS1, SPC25, KIF2C, CENPA, FBXO5, KIF14, KIF15, KIF18A, NUSAP1, NDC80, UBE2C, SPAG5, ZWINT, BUB1B, MAP7, STMN1, KIF20A	347	253	13528	3.69824	0.000301	1.43e-05	0.000246
GOTERM_BP_FAT	GO:0010564~regulation of cell cycle process	16	3.61991	2.04e-07	CAV2, NEK2, INS-IGF2, DLGAP5, CENPF, NUSAP1, TTK, IGF2, ANLN, BIRC5, UBE2C, CALR, GTSE1, MAD2L1, TIMELESS, BUB1, FBXO5	347	114	13528	5.47166	0.000431	1.96e-05	0.000353
GOTERM_BP_FAT	GO:0043627~response to estrogen stimulus	15	3.39367	4.41e-07	KCNMA1, CAV2, CAV1, STS, SOCS2, LEPR, AURKA, AQP1, TIMP3, AURKAPS1, CCND1, TNFRSF11B, KRT19, DUSP1, CCND2, CCNA2	347	105	13528	5.56937	0.000933	4.06e-05	0.000764
GOTERM_BP_FAT	GO:0007010~cytoskeleton organization	31	7.01357	8.5e-07	KIF23, CAV2, CAV1, PRC1, NEK2, DIAPH3, TTK, AURKA, ANLN, CALR, AURKAPS1, SPC25, KIF2C, EZR, TMSB15A, CENPA, FBXO5, ACTC1, KIF18A, NUSAP1, NDC80, UBE2C, KRT19, EPB41L1, SPAG5, ZWINT, SVIL, SCIN, BUB1B, SYNM, MAP7, STMN1	347	436	13528	2.77191	0.00179705	7.49e-05	0.0014717
GOTERM_BP_FAT	GO:0031109~microtubule polymerization or depolymerization	6	1.35747	1.16e-05	KIF2C, CAV2, CAV1, KIF18A, FBXO5, STMN1	347	13	13528	17.9933	0.0241479	0.000977	0.0199989
GOTERM_BP_FAT	GO:0009991~response to extracellular stimulus	19	4.29864	1.44e-05	CAV1, BMP2, SLC8A1, STC2, LYN, LEPR, PPARGC1A, TIMP3, SOD2, CCND1, TNFRSF11B, DUSP1, CD44, ITGA6, SSTR1, JUN, STC1, KLF4, MEST	347	220	13528	3.36694	0.0299044	0.00116704	0.0248388
GOTERM_BP_FAT	GO:0007052~mitotic spindle organization	6	1.35747	2.59e-05	KIF23, SPC25, PRC1, TTK, NDC80, STMN1	347	15	13528	15.5942	0.0532084	0.002023	0.0447274
GOTERM_BP_FAT	GO:0030261~chromosome condensation	7	1.58371	3.15e-05	NCAPH, NCAPG2, NCAPG, NUSAP1, CDCA5, TOP2A, SMC2	347	25	13528	10.916	0.0643661	0.00237329	0.0544224
GOTERM_BP_FAT	GO:0031667~response to nutrient levels	17	3.84615	4.7e-05	CAV1, BMP2, SLC8A1, STC2, LEPR, TIMP3, PPARGC1A, SOD2, CCND1, TNFRSF11B, DUSP1, CD44, SSTR1, JUN, STC1, KLF4, MEST	347	197	13528	3.36424	0.0945693	0.00341981	0.081253
GOTERM_BP_FAT	GO:0042127~regulation of cell proliferation	40	9.04977	5.56e-05	CAV2, CAV1, INS-IGF2, IGFBP6, TTK, CALR, VCAM1, CD47, CD9, S1PR3, WISP2, CDCA7, OSR2, TGM2, PTN, FGF2, CCNA2, RUNX3, CDC6, BMP2, STS, LYN, IL7, CRIP2, IGF2, CDKN3, PDCD1LG2, CDC25B, SOD2, HOXC10, NOTCH2, CDH13, CCND1, TIMELESS, CCND2, SSTR1, JUN, BNC1, SCIN, KLF4, IGFBP5	347	787	13528	1.98148	0.111035	0.00391556	0.0962565
GOTERM_BP_FAT	GO:0007088~regulation of mitosis	9	2.0362	8.22e-05	CAV2, MAD2L1, NEK2, INS-IGF2, DLGAP5, BUB1, CENPF, NUSAP1, TTK, IGF2	347	56	13528	6.26554	0.159571	0.00559214	0.142141
GOTERM_BP_FAT	GO:0051783~regulation of nuclear division	9	2.0362	8.22e-05	CAV2, MAD2L1, NEK2, INS-IGF2, DLGAP5, BUB1, CENPF, NUSAP1, TTK, IGF2	347	56	13528	6.26554	0.159571	0.00559214	0.142141
GOTERM_BP_FAT	GO:0031577~spindle checkpoint	5	1.13122	0.000177	MAD2L1, BUB1, CENPF, TTK, BIRC5	347	12	13528	16.244	0.31219	0.011627	0.305746
GOTERM_BP_FAT	GO:0006974~response to DNA damage stimulus	23	5.20362	0.000245	CDK1, RAD51AP1, LYN, DTL, PTTG1, ESCO2, XRCC6BP1, GTSE1, SOD2, RFC5, TYMS, UHRF1, RFC3, CCND1, TIMELESS, POLE2, FANCI, CHAF1A, CCNA2, TOP2A, FEN1, MAP2K6, TRIP13	347	373	13528	2.40394	0.404458	0.0155829	0.423174
GOTERM_BP_FAT	GO:0007076~mitotic chromosome condensation	5	1.13122	0.00025	NCAPH, NCAPG, NUSAP1, CDCA5, SMC2	347	13	13528	14.9945	0.411234	0.0154595	0.432498
GOTERM_BP_FAT	GO:0007584~response to nutrient	13	2.94118	0.000251	BMP2, SLC8A1, CAV1, STC2, TIMP3, CCND1, TNFRSF11B, CD44, DUSP1, SSTR1, STC1, KLF4, MEST	347	140	13528	3.62009	0.412088	0.0150619	0.43368
GOTERM_BP_FAT	GO:0031401~positive regulation of protein modification process	15	3.39367	0.000325	CDK1, CAV1, BMP2, LYN, INS-IGF2, TTK, CDC20, IGF2, UBE2C, PPARGC1A, CCNB1, CCND1, CCND2, FBXO5, PSMD5, FGF2	347	187	13528	3.12719	0.496873	0.0189	0.560471
GOTERM_BP_FAT	GO:0048015~phosphoinositide-mediated signaling	10	2.26244	0.000408	TYMS, SPAG5, ZWINT, TGM2, BUB1B, NDC80, AURKA, UBE2C, TOP2A, FEN1, AURKAPS1	347	88	13528	4.43018	0.577911	0.0230422	0.703265
GOTERM_BP_FAT	GO:0048545~response to steroid hormone stimulus	15	3.39367	0.000425	KCNMA1, CAV2, CAV1, STS, SOCS2, LEPR, AURKA, AQP1, TIMP3, AURKAPS1, CCND1, TNFRSF11B, KRT19, DUSP1, CCND2, CCNA2	347	192	13528	3.04575	0.59266	0.0233573	0.73216
GOTERM_BP_FAT	GO:0050000~chromosome localization	5	1.13122	0.000459	DLGAP5, KIF18A, CENPF, BIRC5, CDCA5	347	15	13528	12.9952	0.621374	0.0245952	0.791514
GOTERM_BP_FAT	GO:0051303~establishment of chromosome localization	5	1.13122	0.000459	DLGAP5, KIF18A, CENPF, BIRC5, CDCA5	347	15	13528	12.9952	0.621374	0.0245952	0.791514
GOTERM_BP_FAT	GO:0051640~organelle localization	10	2.26244	0.000567	MLPH, CENPA, DLGAP5, KIF18A, CENPF, NUSAP1, BIRC5, NDC80, CDCA5, ASPM	347	92	13528	4.23756	0.69869	0.0295451	0.976753
GOTERM_BP_FAT	GO:0031399~regulation of protein modification process	19	4.29864	0.000599	CDK1, CAV1, BMP2, LYN, INS-IGF2, TTK, IGF2, CDC20, UBE2C, PPARGC1A, CCNB1, CCND1, MAD2L1, CCND2, JUN, PSEN2, BUB1B, FBXO5, PSMD5, FGF2	347	295	13528	2.51094	0.718151	0.0304153	1.03084
GOTERM_BP_FAT	GO:0006261~DNA-dependent DNA replication	8	1.80995	0.00066	CCNE2, RFC3, CDC45, POLE2, PRIM2, MCM3, MCM4, FEN1	347	58	13528	5.37732	0.752668	0.0327154	1.13657
GOTERM_BP_FAT	GO:0008283~cell proliferation	24	5.42986	0.000853	GINS1, FGF5, CKS1B, CRIP1, MKI67, DLGAP5, KIF15, E2F8, TPX2, CENPF, TBX1, PSPH, CSGALNACT1, CDH13, KIF2C, UHRF1, TACSTD2, BUB1, BUB1B, TCF19, EMP1, ASPM, HELLS, RUNX3	347	436	13528	2.146	0.835573	0.0411143	1.46627
GOTERM_BP_FAT	GO:0043067~regulation of programmed cell death	37	8.37104	0.000899	CADM1, INS-IGF2, GDF5, HSPA1A, PMAIP1, HSPA1B, CALR, TIMP3, PRUNE2, PTGIS, CD44, COMP, TGM2, TNFRSF19, FGF2, TOP2A, RUNX3, MAP2K6, HELLS, PHLDA1, KCNMA1, CDK1, FOXL2, NTF3, SOCS2, IL7, IGF2, BIRC5, DAPK1, SOD2, NOTCH2, CDH13, SFRP1, CARD16, DUSP1, JUN, SCIN, PSEN2, SERPINB2	347	812	13528	1.77644	0.850822	0.0423197	1.54471
GOTERM_BP_FAT	GO:0010941~regulation of cell death	37	8.37104	0.000957	CADM1, INS-IGF2, GDF5, HSPA1A, PMAIP1, HSPA1B, CALR, TIMP3, PRUNE2, PTGIS, CD44, COMP, TGM2, TNFRSF19, FGF2, TOP2A, RUNX3, MAP2K6, HELLS, PHLDA1, KCNMA1, CDK1, FOXL2, NTF3, SOCS2, IL7, IGF2, BIRC5, DAPK1, SOD2, NOTCH2, CDH13, SFRP1, CARD16, DUSP1, JUN, SCIN, PSEN2, SERPINB2	347	815	13528	1.7699	0.868144	0.0440247	1.64409
GOTERM_BP_FAT	GO:0008284~positive regulation of cell proliferation	23	5.20362	0.000997	STS, LYN, INS-IGF2, CRIP2, IL7, TTK, IGF2, CALR, PDCD1LG2, CDC25B, HOXC10, VCAM1, CD47, CDH13, S1PR3, CCND1, OSR2, CCND2, JUN, BNC1, TGM2, PTN, FGF2, CCNA2	347	414	13528	2.16587	0.878776	0.0448359	1.71173
GOTERM_BP_FAT	GO:0033043~regulation of organelle organization	15	3.39367	0.00140893	CAV2, CAV1, NEK2, INS-IGF2, DLGAP5, CENPF, NUSAP1, TTK, IGF2, PPARGC1A, MAD2L1, TMSB15A, SCIN, BUB1, SKA3, SKA1	347	217	13528	2.69486	0.949308	0.0614758	2.41041
GOTERM_BP_FAT	GO:0042981~regulation of apoptosis	36	8.1448	0.00144048	CADM1, INS-IGF2, GDF5, HSPA1A, PMAIP1, HSPA1B, CALR, TIMP3, PRUNE2, PTGIS, CD44, COMP, TGM2, TNFRSF19, TOP2A, RUNX3, MAP2K6, HELLS, PHLDA1, KCNMA1, CDK1, FOXL2, NTF3, SOCS2, IL7, IGF2, BIRC5, SOD2, DAPK1, NOTCH2, CDH13, SFRP1, CARD16, DUSP1, JUN, SCIN, PSEN2, SERPINB2	347	804	13528	1.74562	0.952585	0.0615417	2.46375
GOTERM_BP_FAT	GO:0051325~interphase	10	2.26244	0.0015694	CCNB1, CDC6, PRUNE2, CCND1, CCND2, CENPF, BIRC5, CDKN3, CDCA5, GTSE1	347	106	13528	3.67789	0.963916	0.0655469	2.68145
GOTERM_BP_FAT	GO:0051656~establishment of organelle localization	8	1.80995	0.00186497	CENPA, DLGAP5, KIF18A, CENPF, NUSAP1, BIRC5, NDC80, CDCA5	347	69	13528	4.52007	0.980709	0.0759249	3.17881
GOTERM_BP_FAT	GO:0030071~regulation of mitotic metaphase/anaphase transition	5	1.13122	0.00213587	MAD2L1, DLGAP5, BUB1, CENPF, TTK	347	22	13528	8.86036	0.989135	0.084853	3.63255
GOTERM_BP_FAT	GO:0051439~regulation of ubiquitin-protein ligase activity during mitotic cell cycle	8	1.80995	0.00220118	CCNB1, CDK1, MAD2L1, BUB1B, FBXO5, CDC20, PSMD5, UBE2C	347	71	13528	4.39274	0.990539	0.0857282	3.74164
GOTERM_BP_FAT	GO:0032269~negative regulation of cellular protein metabolic process	13	2.94118	0.00230772	CAV1, INS-IGF2, CDC20, IGF2, UBE2C, CALR, TIMP3, MAD2L1, JUN, PSEN2, BUB1B, FBXO5, PSMD5, IGFBP5	347	180	13528	2.81563	0.992452	0.0880749	3.91935
GOTERM_BP_FAT	GO:0045841~negative regulation of mitotic metaphase/anaphase transition	4	0.904977	0.00234913	MAD2L1, BUB1, CENPF, TTK	347	11	13528	14.1766	0.993086	0.0880004	3.98834
GOTERM_BP_FAT	GO:0007094~mitotic cell cycle spindle assembly checkpoint	4	0.904977	0.00234913	MAD2L1, BUB1, CENPF, TTK	347	11	13528	14.1766	0.993086	0.0880004	3.98834
GOTERM_BP_FAT	GO:0000079~regulation of cyclin-dependent protein kinase activity	7	1.58371	0.00246092	CCNE2, CKS1B, CDC6, CCND1, DIRAS3, CCND2, CDKN3	347	54	13528	5.05369	0.994545	0.0904	4.17435
GOTERM_BP_FAT	GO:0006916~anti-apoptosis	14	3.16742	0.00250305	CDK1, SOCS2, IL7, HSPA1A, BIRC5, HSPA1B, SOD2, DAPK1, NOTCH2, CDH13, SFRP1, COMP, TGM2, SERPINB2, HELLS	347	206	13528	2.64951	0.995011	0.0903117	4.24436
GOTERM_BP_FAT	GO:0032270~positive regulation of cellular protein metabolic process	15	3.39367	0.00272564	CDK1, CAV1, BMP2, LYN, INS-IGF2, TTK, CDC20, IGF2, UBE2C, PPARGC1A, CCNB1, CCND1, CCND2, FBXO5, PSMD5, FGF2	347	233	13528	2.5098	0.996888	0.0963145	4.61347
GOTERM_BP_FAT	GO:0051784~negative regulation of nuclear division	4	0.904977	0.00307319	MAD2L1, BUB1, CENPF, TTK	347	12	13528	12.9952	0.998511	0.106169	5.18711
GOTERM_BP_FAT	GO:0045839~negative regulation of mitosis	4	0.904977	0.00307319	MAD2L1, BUB1, CENPF, TTK	347	12	13528	12.9952	0.998511	0.106169	5.18711
GOTERM_BP_FAT	GO:0007517~muscle organ development	14	3.16742	0.00308057	CAV2, CAV1, ACTC1, FOXL2, FHL1, TIPARP, CENPF, TBX1, MBNL1, FAM65B, MEOX2, SVIL, ITGA7, IGFBP5	347	211	13528	2.58672	0.998534	0.104704	5.19925
GOTERM_BP_FAT	GO:0006323~DNA packaging	10	2.26244	0.00309228	NCAPH, NCAPG2, NCAPG, CENPA, NUSAP1, CHAF1A, CDCA5, TOP2A, SMC2, HELLS	347	117	13528	3.3321	0.99857	0.103424	5.21852
GOTERM_BP_FAT	GO:0051248~negative regulation of protein metabolic process	13	2.94118	0.00315998	CAV1, INS-IGF2, CDC20, IGF2, UBE2C, CALR, TIMP3, MAD2L1, JUN, PSEN2, BUB1B, FBXO5, PSMD5, IGFBP5	347	187	13528	2.71023	0.998762	0.10393	5.32985
GOTERM_BP_FAT	GO:0010033~response to organic substance	32	7.23982	0.00323066	CAV2, CAV1, INS-IGF2, LEPR, AURKA, HSPA1A, PMAIP1, HSPA1B, MMP3, AQP1, TIMP3, AURKAPS1, TNFRSF11B, HSPA2, CD44, CCNA2, PIK3R1, KCNMA1, SLC8A1, STS, ACTC1, LYN, SOCS2, IGF2, CDH13, KRT19, CCND1, DUSP1, CCND2, JUN, HSPB7, ABAT, CTSC, HSPB3, TJP2	347	721	13528	1.73029	0.998934	0.104511	5.44594
GOTERM_BP_FAT	GO:0045787~positive regulation of cell cycle	7	1.58371	0.0032436	CCND1, CCND2, INS-IGF2, DLGAP5, NUSAP1, BIRC5, IGF2, CALR	347	57	13528	4.7877	0.998963	0.103332	5.46718
GOTERM_BP_FAT	GO:0051438~regulation of ubiquitin-protein ligase activity	8	1.80995	0.00375745	CCNB1, CDK1, MAD2L1, BUB1B, FBXO5, CDC20, PSMD5, UBE2C	347	78	13528	3.99852	0.999652	0.116978	6.307
GOTERM_BP_FAT	GO:0007019~microtubule depolymerization	3	0.678733	0.00378246	KIF2C, KIF18A, STMN1	347	4	13528	29.2392	0.99967	0.116009	6.3477
GOTERM_BP_FAT	GO:0051261~protein depolymerization	3	0.678733	0.00378246	KIF2C, KIF18A, STMN1	347	4	13528	29.2392	0.99967	0.116009	6.3477
GOTERM_BP_FAT	GO:0007144~female meiosis I	3	0.678733	0.00378246	FBXO5, TRIP13, CDC25B	347	4	13528	29.2392	0.99967	0.116009	6.3477
GOTERM_BP_FAT	GO:0001556~oocyte maturation	4	0.904977	0.00392002	CCNB1, FBXO5, TRIP13, CDC25B	347	13	13528	11.9956	0.999753	0.118267	6.57125
GOTERM_BP_FAT	GO:0051247~positive regulation of protein metabolic process	15	3.39367	0.0039775	CDK1, CAV1, BMP2, LYN, INS-IGF2, TTK, CDC20, IGF2, UBE2C, PPARGC1A, CCNB1, CCND1, CCND2, FBXO5, PSMD5, FGF2	347	243	13528	2.40652	0.999782	0.118217	6.6645
GOTERM_BP_FAT	GO:0001558~regulation of cell growth	13	2.94118	0.00424897	DCBLD2, SOCS2, IL7, INS-IGF2, IGFBP6, IGF2, CHPT1, NOV, CDH13, WISP2, CD44, SEMA3A, FGF2, IGFBP5	347	194	13528	2.61244	0.999877	0.124042	7.10376
GOTERM_BP_FAT	GO:0021700~developmental maturation	9	2.0362	0.00433412	KCNMA1, CCNB1, CD44, PSEN2, NTN4, FBXO5, RUNX3, TRIP13, CDC25B	347	101	13528	3.47396	0.999898	0.124657	7.24113
GOTERM_BP_FAT	GO:0051340~regulation of ligase activity	8	1.80995	0.0046349	CCNB1, CDK1, MAD2L1, BUB1B, FBXO5, CDC20, PSMD5, UBE2C	347	81	13528	3.85043	0.999946	0.13096	7.72486
GOTERM_BP_FAT	GO:0051329~interphase of mitotic cell cycle	9	2.0362	0.00488066	CCNB1, CDC6, CCND1, CCND2, CENPF, BIRC5, CDKN3, CDCA5, GTSE1	347	103	13528	3.40651	0.999968	0.135621	8.11833
GOTERM_BP_FAT	GO:0001944~vasculature development	15	3.39367	0.00528204	CAV1, LEPR, TIPARP, EFNB2, TBX1, ITGA4, SEMA5A, CDH13, ARHGAP22, MEOX2, CD44, JUN, ITGA7, TGM2, FGF2	347	251	13528	2.32982	0.999986	0.144074	8.75757
GOTERM_BP_FAT	GO:0032268~regulation of cellular protein metabolic process	23	5.20362	0.00533752	CDK1, CAV1, BMP2, LYN, INS-IGF2, TTK, IGF2, CDC20, UBE2C, CALR, PPARGC1A, TIMP3, CCNB1, CCND1, MAD2L1, DIO2, CCND2, JUN, PSEN2, BUB1B, FBXO5, PSMD5, FGF2, IGFBP5	347	474	13528	1.89171	0.999988	0.143633	8.8456
GOTERM_BP_FAT	GO:0008285~negative regulation of cell proliferation	19	4.29864	0.00546705	CAV2, CDC6, CAV1, BMP2, IGFBP6, CDKN3, PDCD1LG2, SOD2, CD9, CDH13, NOTCH2, WISP2, SSTR1, JUN, SCIN, FGF2, RUNX3, KLF4, IGFBP5	347	361	13528	2.05187	0.999991	0.145025	9.05081
GOTERM_BP_FAT	GO:0033554~cellular response to stress	26	5.88235	0.00567403	CAV1, PTTG1, GTSE1, TYMS, POLE2, FANCI, TNFRSF19, CCNA2, TOP2A, FEN1, MAP2K6, TRIP13, CDK1, RAD51AP1, LYN, DTL, XRCC6BP1, ESCO2, SOD2, RFC5, UHRF1, CCND1, RFC3, TIMELESS, JUN, CHAF1A	347	566	13528	1.79086	0.999994	0.148251	9.37781
GOTERM_BP_FAT	GO:0008219~cell death	31	7.01357	0.00571068	STEAP3, TNFRSF21, CADM1, INS-IGF2, MMD, PMAIP1, PRUNE2, TNFRSF11B, TMEM123, TGM2, TNFRSF19, SEMA3A, FGF2, TOP2A, PHLDA2, SRGN, PHLDA1, CKAP2, FOXL2, ACTC1, DBC1, IGF2, BIRC5, AHR, SOD2, DAPK1, JUN, HSPB8, PSEN2, BUB1B, DRAM1, C1D	347	719	13528	1.68088	0.999995	0.147326	9.4356
GOTERM_BP_FAT	GO:0051235~maintenance of location	7	1.58371	0.00577526	CAV1, EZR, TMSB15A, NDC80, CALR, ASPM, SRGN	347	64	13528	4.26405	0.999995	0.147082	9.53734
GOTERM_BP_FAT	GO:0016265~death	31	7.01357	0.00618786	STEAP3, TNFRSF21, CADM1, INS-IGF2, MMD, PMAIP1, PRUNE2, TNFRSF11B, TMEM123, TGM2, TNFRSF19, SEMA3A, FGF2, TOP2A, PHLDA2, SRGN, PHLDA1, CKAP2, FOXL2, ACTC1, DBC1, IGF2, BIRC5, AHR, SOD2, DAPK1, JUN, HSPB8, PSEN2, BUB1B, DRAM1, C1D	347	724	13528	1.66927	0.999998	0.154906	10.1848
GOTERM_BP_FAT	GO:0031145~anaphase-promoting complex-dependent proteasomal ubiquitin-dependent protein catabolic process	7	1.58371	0.00622907	CCNB1, CDK1, MAD2L1, BUB1B, CDC20, PSMD5, UBE2C	347	65	13528	4.19845	0.999998	0.154043	10.2493
GOTERM_BP_FAT	GO:0033273~response to vitamin	7	1.58371	0.00670829	CCND1, BMP2, DUSP1, CD44, TIMP3, KLF4, MEST	347	66	13528	4.13484	0.999999	0.163014	10.9953
GOTERM_BP_FAT	GO:0007519~skeletal muscle tissue development	7	1.58371	0.00670829	CAV2, CAV1, FOXL2, MEOX2, SVIL, MBNL1, IGFBP5	347	66	13528	4.13484	0.999999	0.163014	10.9953
GOTERM_BP_FAT	GO:0060538~skeletal muscle organ development	7	1.58371	0.00670829	CAV2, CAV1, FOXL2, MEOX2, SVIL, MBNL1, IGFBP5	347	66	13528	4.13484	0.999999	0.163014	10.9953
GOTERM_BP_FAT	GO:0006270~DNA replication initiation	4	0.904977	0.00725173	CCNE2, CDC45, MCM3, MCM4	347	16	13528	9.7464	1	0.173075	11.8343
GOTERM_BP_FAT	GO:0040007~growth	12	2.71493	0.00747946	INHBB, CCNB1, GINS1, NOTCH2, BMP2, FHL1, PSEN2, GDF5, SEPP1, TIMP3, EMP1, IGFBP5	347	183	13528	2.55643	1	0.176046	12.1836
GOTERM_BP_FAT	GO:0019932~second-messenger-mediated signaling	14	3.16742	0.00750859	RXFP1, AURKA, NDC80, UBE2C, AURKAPS1, S1PR3, TYMS, APITD1, SSTR1, SPAG5, ZWINT, TGM2, BUB1B, TOP2A, FEN1	347	235	13528	2.32255	1	0.174739	12.2282
GOTERM_BP_FAT	GO:0001934~positive regulation of protein amino acid phosphorylation	8	1.80995	0.00772879	CAV1, CCND1, BMP2, LYN, CCND2, INS-IGF2, TTK, IGF2, FGF2	347	89	13528	3.50432	1	0.177458	12.5646
GOTERM_BP_FAT	GO:0048514~blood vessel morphogenesis	13	2.94118	0.0081686	CAV1, LEPR, TIPARP, TBX1, ITGA4, SEMA5A, CDH13, ARHGAP22, MEOX2, JUN, ITGA7, TGM2, FGF2	347	211	13528	2.40196	1	0.18461	13.2328
GOTERM_BP_FAT	GO:0009719~response to endogenous stimulus	20	4.52489	0.00823511	KCNMA1, CAV2, CAV1, STS, SOCS2, LYN, INS-IGF2, LEPR, IGF2, AURKA, AQP1, MMP3, TIMP3, AURKAPS1, CDH13, KRT19, CCND1, TNFRSF11B, DUSP1, CCND2, CCNA2, PIK3R1	347	405	13528	1.92521	1	0.18402	13.3335
GOTERM_BP_FAT	GO:0045165~cell fate commitment	10	2.26244	0.0094391	HOXC10, NOTCH2, BMP2, HOXC11, NTF3, IL7, PSEN2, TBX1, FGF2, KLF4	347	139	13528	2.80472	1	0.205909	15.1363
GOTERM_BP_FAT	GO:0031570~DNA integrity checkpoint	6	1.35747	0.0103328	CDK1, CDC6, CCND1, CDC45, CCNA2, GTSE1	347	52	13528	4.49834	1	0.220911	16.4515
GOTERM_BP_FAT	GO:0001568~blood vessel development	14	3.16742	0.0104669	CAV1, LEPR, TIPARP, TBX1, ITGA4, SEMA5A, CDH13, ARHGAP22, MEOX2, CD44, JUN, ITGA7, TGM2, FGF2	347	245	13528	2.22775	1	0.221235	16.6472
GOTERM_BP_FAT	GO:0031400~negative regulation of protein modification process	9	2.0362	0.0113558	CAV1, MAD2L1, JUN, PSEN2, BUB1B, FBXO5, CDC20, PSMD5, UBE2C	347	119	13528	2.94849	1	0.23539	17.9336
GOTERM_BP_FAT	GO:0043086~negative regulation of catalytic activity	15	3.39367	0.0119211	CAV1, IL7, INS-IGF2, LEPR, CDC20, BIRC5, IGF2, UBE2C, S1PR3, MAD2L1, APITD1, ARG2, BUB1B, FBXO5, PSMD5, DUSP6	347	277	13528	2.11113	1	0.243256	18.7418
GOTERM_BP_FAT	GO:0042327~positive regulation of phosphorylation	8	1.80995	0.0121335	CAV1, CCND1, BMP2, LYN, CCND2, INS-IGF2, TTK, IGF2, FGF2	347	97	13528	3.21531	1	0.244704	19.0437
GOTERM_BP_FAT	GO:0048469~cell maturation	7	1.58371	0.0122917	KCNMA1, CCNB1, NTN4, FBXO5, RUNX3, TRIP13, CDC25B	347	75	13528	3.63866	1	0.245174	19.2676
GOTERM_BP_FAT	GO:0014070~response to organic cyclic substance	9	2.0362	0.0124741	CCND1, STS, LYN, CD44, CCND2, JUN, LEPR, ABAT, TIMP3	347	121	13528	2.89975	1	0.246052	19.5253
GOTERM_BP_FAT	GO:0007126~meiosis	8	1.80995	0.0127897	MKI67, HSPA2, NEK2, SGOL2, PSMC3IP, FBXO5, TRIP13, CDC25B	347	98	13528	3.1825	1	0.249169	19.9692
GOTERM_BP_FAT	GO:0051327~M phase of meiotic cell cycle	8	1.80995	0.0127897	MKI67, HSPA2, NEK2, SGOL2, PSMC3IP, FBXO5, TRIP13, CDC25B	347	98	13528	3.1825	1	0.249169	19.9692
	Down-regulated genes
Category	Term	Count	%	PValue	Genes	List Total	Pop Hits	Pop Total	Fold Enrichment	Bonferroni	Benjamini	FDR
GOTERM_BP_FAT	GO:0008285~negative regulation of cell proliferation	16	8.37696	1.06e-05	RARRES3, PTGS2, TBX5, TGFB3, PTHLH, WARS, CGREF1, CTH, MSX1, NUPR1, BCL11B, AGT, FABP3, AXIN2, NFIB, DPT	150	361	13528	3.99719	0.0153252	0.0153252	0.0175062
GOTERM_BP_FAT	GO:0006563~L-serine metabolic process	4	2.09424	7.04e-05	SHMT2, PHGDH, PSAT1, CBS	150	8	13528	45.0933	0.0977752	0.0501448	0.116573
GOTERM_BP_FAT	GO:0009069~serine family amino acid metabolic process	5	2.6178	0.000175	CTH, SHMT2, PHGDH, PSAT1, CBS	150	26	13528	17.3436	0.225595	0.08169	0.289407
GOTERM_BP_FAT	GO:0009070~serine family amino acid biosynthetic process	4	2.09424	0.000203	CTH, PHGDH, PSAT1, CBS	150	11	13528	32.7952	0.256138	0.071305	0.33488
GOTERM_BP_FAT	GO:0001501~skeletal system development	13	6.80628	0.000213	PTGS2, TGFB3, MGP, SOX9, HOXD10, PTHLH, IGSF10, INHBA, MSX1, GDF10, AXIN2, COL11A1, COL10A1	150	319	13528	3.67532	0.267378	0.0603286	0.352081
GOTERM_BP_FAT	GO:0008652~cellular amino acid biosynthetic process	6	3.14136	0.000237	BCAT1, CTH, PHGDH, ASNS, PSAT1, CBS	150	51	13528	10.6102	0.29243	0.0560227	0.391378
GOTERM_BP_FAT	GO:0042127~regulation of cell proliferation	21	10.9948	0.000396	RARRES3, PTGS2, TBX5, CLU, TGFB3, SOX9, PTHLH, AGTR1, WARS, CGREF1, CTH, MSX1, NUPR1, BCL11B, AGT, FABP3, ID4, AXIN2, MAB21L1, NFIB, DPT	150	787	13528	2.40651	0.439485	0.0793727	0.654113
GOTERM_BP_FAT	GO:0007507~heart development	10	5.2356	0.000625	MSX1, KCNJ8, TBX5, FKBP1A, ID3, ADAM19, SOX9, COL11A1, TPM1, NFATC1	150	215	13528	4.19473	0.598885	0.10791	1.03024
GOTERM_BP_FAT	GO:0030324~lung development	7	3.66492	0.00078	PTHLH, CRISPLD2, TBX5, FOXF1, TGFB3, MGP, NFIB	150	99	13528	6.37684	0.680038	0.118929	1.28353
GOTERM_BP_FAT	GO:0030323~respiratory tube development	7	3.66492	0.000912	PTHLH, CRISPLD2, TBX5, FOXF1, TGFB3, MGP, NFIB	150	102	13528	6.18928	0.736339	0.124805	1.49988
GOTERM_BP_FAT	GO:0040007~growth	9	4.71204	0.000947	IGSF10, INHBA, ST6GAL2, PTGS2, NUPR1, GDF6, TGFB3, SLC3A2, CSRP2	150	183	13528	4.43541	0.749449	0.118232	1.55681
GOTERM_BP_FAT	GO:0030198~extracellular matrix organization	7	3.66492	0.00100945	COL14A1, CRISPLD2, AGT, FOXF1, FKBP1A, COL11A1, DPT	150	104	13528	6.07026	0.771348	0.115704	1.65883
GOTERM_BP_FAT	GO:0060541~respiratory system development	7	3.66492	0.00122813	PTHLH, CRISPLD2, TBX5, FOXF1, TGFB3, MGP, NFIB	150	108	13528	5.84543	0.833939	0.128995	2.01476
GOTERM_BP_FAT	GO:0046394~carboxylic acid biosynthetic process	8	4.18848	0.00163406	BCAT1, CTH, PTGS2, C1QTNF3, PHGDH, ASNS, PSAT1, CBS	150	155	13528	4.6548	0.908308	0.156897	2.67226
GOTERM_BP_FAT	GO:0016053~organic acid biosynthetic process	8	4.18848	0.00163406	BCAT1, CTH, PTGS2, C1QTNF3, PHGDH, ASNS, PSAT1, CBS	150	155	13528	4.6548	0.908308	0.156897	2.67226
GOTERM_BP_FAT	GO:0009309~amine biosynthetic process	6	3.14136	0.00198304	BCAT1, CTH, PHGDH, ASNS, PSAT1, CBS	150	81	13528	6.68049	0.944982	0.175798	3.2342
GOTERM_BP_FAT	GO:0060348~bone development	7	3.66492	0.00238437	IGSF10, PTHLH, PTGS2, TGFB3, MGP, AXIN2, SOX9	150	123	13528	5.13257	0.969429	0.19586	3.87666
GOTERM_BP_FAT	GO:0035295~tube development	9	4.71204	0.00302005	PTHLH, CRISPLD2, TBX5, AGT, FOXF1, TGFB3, MGP, NR4A3, NFIB	150	220	13528	3.68945	0.987953	0.228902	4.8861
GOTERM_BP_FAT	GO:0007167~enzyme linked receptor protein signaling pathway	11	5.75916	0.00458821	EPHA4, EIF4EBP1, REPS2, MSX1, EFNB3, DOK5, MYO1E, GDF6, TGFB3, GDF10, FKBP1A	150	342	13528	2.90074	0.998792	0.311519	7.33383
GOTERM_BP_FAT	GO:0008217~regulation of blood pressure	6	3.14136	0.00493465	AGTR1, ACTG2, PTGS2, AGT, EPHX2, TPM1	150	100	13528	5.4112	0.999274	0.316404	7.86655
GOTERM_BP_FAT	GO:0008361~regulation of cell size	8	4.18848	0.00780412	DEPDC6, INHBA, CTH, NUPR1, AGT, TGFB3, SLC3A2, CSRP2	150	206	13528	3.50239	0.999989	0.435789	12.1696
GOTERM_BP_FAT	GO:0048705~skeletal system morphogenesis	6	3.14136	0.00791988	PTHLH, TGFB3, MGP, SOX9, COL11A1, HOXD10	150	112	13528	4.83143	0.999991	0.424888	12.3391
GOTERM_BP_FAT	GO:0045944~positive regulation of transcription from RNA polymerase II promoter	11	5.75916	0.00799718	GLIS3, INHBA, MAFB, TBX5, BCL11B, TGFB3, NR4A3, SOX9, RUNX1, HOXD10, NFIB	150	371	13528	2.674	0.999992	0.413288	12.4522
GOTERM_BP_FAT	GO:0001503~ossification	6	3.14136	0.00882724	IGSF10, PTHLH, PTGS2, TGFB3, MGP, AXIN2	150	115	13528	4.70539	0.999998	0.430622	13.6576
GOTERM_BP_FAT	GO:0043062~extracellular structure organization	7	3.66492	0.00932304	COL14A1, CRISPLD2, AGT, FOXF1, FKBP1A, COL11A1, DPT	150	163	13528	3.87305	0.999999	0.434589	14.3702
GOTERM_BP_FAT	GO:0045596~negative regulation of cell differentiation	8	4.18848	0.00998529	PTHLH, INHBA, ATF5, MAFB, ID4, AXIN2, SOX9, RUNX1	150	216	13528	3.34025	1	0.443714	15.3133
GOTERM_BP_FAT	GO:0030278~regulation of ossification	5	2.6178	0.0107401	TGFB3, MGP, GDF10, AXIN2, SOX9	150	78	13528	5.7812	1	0.454893	16.3763
GOTERM_BP_FAT	GO:0042692~muscle cell differentiation	6	3.14136	0.0108529	TBX5, AGT, FOXF1, ADAM12, CSRP2, TPM1	150	121	13528	4.47207	1	0.445935	16.5342
GOTERM_BP_FAT	GO:0043009~chordate embryonic development	10	5.2356	0.011051	MSX1, SFRP2, MYO1E, FOXF1, TGFB3, PHGDH, AXIN2, COL11A1, TPM1, HOXD10	150	331	13528	2.72467	1	0.440009	16.8106
GOTERM_BP_FAT	GO:0009792~embryonic development ending in birth or egg hatching	10	5.2356	0.0116717	MSX1, SFRP2, MYO1E, FOXF1, TGFB3, PHGDH, AXIN2, COL11A1, TPM1, HOXD10	150	334	13528	2.7002	1	0.446488	17.6712

## Sheet: CAA-C
	Up-regulated genes
Category	Term	Count	%	PValue	Genes	List Total	Pop Hits	Pop Total	Fold Enrichment	Bonferroni	Benjamini	FDR
GOTERM_BP_FAT	GO:0016125~sterol metabolic process	19	3.45455	1.19e-09	SREBF1, OSBPL5, EBP, CUBN, MVD, LDLR, HMGCR, LEPR, HMGCS1, FDPS, LSS, C14ORF1, PMVK, FDFT1, SQLE, INSIG1, PCSK9, IDI1, DHCR24	411	101	13528	6.1919	2.65e-06	2.65e-06	2.07e-06
GOTERM_BP_FAT	GO:0008203~cholesterol metabolic process	18	3.27273	1.94e-09	SREBF1, OSBPL5, EBP, CUBN, MVD, LDLR, HMGCR, LEPR, HMGCS1, FDPS, LSS, PMVK, FDFT1, SQLE, INSIG1, PCSK9, IDI1, DHCR24	411	92	13528	6.43986	4.3e-06	2.15e-06	3.37e-06
GOTERM_BP_FAT	GO:0008202~steroid metabolic process	26	4.72727	2.26e-09	MVD, LDLR, HSD3B7, HSD17B14, HMGCR, LEPR, HMGCS1, LSS, PMVK, C14ORF1, FDFT1, AKR1C2, C1QTNF3, INSIG1, PCSK9, HSD17B7, AKR1C1, DHCR24, SREBF1, EBP, OSBPL5, CUBN, FDPS, TECR, SQLE, IDI1	411	202	13528	4.23656	5.01e-06	1.67e-06	3.93e-06
GOTERM_BP_FAT	GO:0016126~sterol biosynthetic process	12	2.18182	3.76e-09	EBP, MVD, HMGCR, SQLE, HMGCS1, FDPS, LSS, C14ORF1, IDI1, PMVK, DHCR24, FDFT1	411	35	13528	11.2851	8.35e-06	2.09e-06	6.54e-06
GOTERM_BP_FAT	GO:0006694~steroid biosynthetic process	16	2.90909	3.36e-08	EBP, MVD, HMGCR, HSD3B7, FDPS, HMGCS1, LSS, PMVK, C14ORF1, TECR, FDFT1, C1QTNF3, SQLE, IDI1, HSD17B7, DHCR24	411	85	13528	6.19573	7.45e-05	1.49e-05	5.84e-05
GOTERM_BP_FAT	GO:0006695~cholesterol biosynthetic process	10	1.81818	3.91e-08	EBP, MVD, HMGCR, HMGCS1, FDPS, LSS, IDI1, PMVK, DHCR24, FDFT1	411	26	13528	12.6596	8.68e-05	1.45e-05	6.8e-05
GOTERM_BP_FAT	GO:0008610~lipid biosynthetic process	31	5.63636	5.05e-08	MVD, HMGCR, HSD3B7, HMGCS1, LSS, C14ORF1, PMVK, ACSS2, FDFT1, FAR2, SERINC4, C1QTNF3, ELOVL4, ANG, ELOVL6, AGPAT4, HSD17B7, DHCR24, EBP, SCD, FDPS, FADS2, CERCAM, LPCAT3, TECR, PLA2G4A, C5ORF4, SQLE, FABP3, DPM3, IDI1	411	323	13528	3.15901	0.000112	1.6e-05	8.79e-05
GOTERM_BP_FAT	GO:0008285~negative regulation of cell proliferation	27	4.90909	4.13e-05	RARRES3, IFITM1, TGFB3, WNT2, CD9, WISP2, CGREF1, ANG, KIFAP3, GPNMB, AXIN2, DPT, DHCR24, BMP4, CEBPA, KAT2B, CD276, TNFRSF14, GAS1, CDKN3, MXD4, PTHLH, FABP3, GDF11, WFDC1, TGFBR3, PMP22	411	361	13528	2.46177	0.0876772	0.0114046	0.0718777
GOTERM_BP_FAT	GO:0040007~growth	18	3.27273	4.17e-05	BMP4, ST6GAL2, NINJ2, TGFB3, GAS1, MREG, CSRP2, IGSF10, CCNB1, SLC1A2, CCNB2, LY6E, GSN, NDRG4, GDF11, TGFBR3, EMP1, DCLK1	411	183	13528	3.23753	0.0884128	0.0102326	0.0725093
GOTERM_BP_FAT	GO:0001501~skeletal system development	24	4.36364	0.000111	BMP4, EBP, BMP1, COL13A1, PRRX1, TGFB3, MGP, ACP5, GAS1, IGSF10, PTHLH, ACVR2A, CTSK, OSR2, COMP, GDF11, PTN, COL12A1, GDF10, KIAA1217, COL1A1, AXIN2, GPNMB, COL10A1	411	319	13528	2.47635	0.218794	0.0243894	0.193295
GOTERM_BP_FAT	GO:0008299~isoprenoid biosynthetic process	6	1.09091	0.000265	MVD, HMGCR, HMGCS1, FDPS, IDI1, FDFT1	411	20	13528	9.87445	0.445516	0.052199	0.461033
GOTERM_BP_FAT	GO:0060348~bone development	13	2.36364	0.000354	BMP4, BMP1, COL13A1, TGFB3, ACP5, MGP, PTHLH, IGSF10, CTSK, PTN, COL1A1, GPNMB, AXIN2	411	123	13528	3.4788	0.544252	0.0633866	0.613867
GOTERM_BP_FAT	GO:0042127~regulation of cell proliferation	42	7.63636	0.000488	RARRES3, FOSL2, MVD, IFITM1, FOXM1, CLU, MITF, TGFB3, PRRX1, TTK, WNT2, CD9, WISP2, CGREF1, OSR2, ANG, KIFAP3, PTN, GPNMB, AXIN2, DHCR24, DPT, CEBPA, BMP4, PTGER2, KAT2B, CD276, TNFRSF14, GAS1, CDKN3, CLEC11A, CDC25B, MXD4, PTHLH, LAMA1, PLA2G4A, DBP, GDF11, FABP3, TGFBR3, WFDC1, PMP22	411	787	13528	1.75657	0.661907	0.0800334	0.846154
GOTERM_BP_FAT	GO:0001503~ossification	12	2.18182	0.00073	IGSF10, PTHLH, BMP4, CTSK, BMP1, COL13A1, TGFB3, PTN, MGP, COL1A1, AXIN2, GPNMB	411	115	13528	3.43459	0.802496	0.109397	1.26294
GOTERM_BP_FAT	GO:0022402~cell cycle process	32	5.81818	0.00105071	HSD3B7, TTK, PTTG1, PLAGL1, PRUNE2, CGREF1, CENPA, SKA1, DYNC1H1, ASPM, DHCR24, KAT2B, MKI67, DLGAP5, PIM1, CENPF, NUSAP1, BIRC5, CENPE, CDC20, GAS1, CDKN3, CDC25B, KLHDC3, CCNB1, CCNB2, RASSF1, MAPRE2, STMN1, CIT, ARAP1, NEK6	411	565	13528	1.8642	0.903176	0.144148	1.81295
GOTERM_BP_FAT	GO:0030501~positive regulation of bone mineralization	5	0.909091	0.00181508	BMP4, ACVR2A, PLA2G4A, CD276, TGFB3	411	18	13528	9.14301	0.982313	0.222899	3.1123
GOTERM_BP_FAT	GO:0051640~organelle localization	10	1.81818	0.00186306	KIF1B, MLPH, CENPA, DLGAP5, CENPF, NUSAP1, BIRC5, CENPE, ASPM, COPE	411	92	13528	3.5777	0.984104	0.216222	3.19332
GOTERM_BP_FAT	GO:0030500~regulation of bone mineralization	6	1.09091	0.00190193	BMP4, ACVR2A, PLA2G4A, CD276, TGFB3, MGP	411	30	13528	6.58297	0.985422	0.209351	3.25891
GOTERM_BP_FAT	GO:0006720~isoprenoid metabolic process	7	1.27273	0.00198881	MVD, HMGCR, CRABP2, HMGCS1, FDPS, IDI1, FDFT1	411	44	13528	5.23645	0.987984	0.207619	3.40535
GOTERM_BP_FAT	GO:0070169~positive regulation of biomineral formation	5	0.909091	0.00224466	BMP4, ACVR2A, PLA2G4A, CD276, TGFB3	411	19	13528	8.6618	0.993201	0.220848	3.83541
GOTERM_BP_FAT	GO:0007049~cell cycle	39	7.09091	0.00236006	HSD3B7, C13ORF15, FOXM1, TTK, PTTG1, PLAGL1, PRUNE2, CGREF1, CENPA, SKA1, DYNC1H1, ASPM, DHCR24, UPF1, KAT2B, MKI67, PDPN, DLGAP5, PIM1, CENPF, NUSAP1, CDC20, BIRC5, CENPE, GAS1, CDKN3, AHR, CDC25B, KLHDC3, CCNB1, CCNB2, RASSF1, RASSF2, MAPRE2, STMN1, SEPT6, CIT, ARAP1, NEK6	411	776	13528	1.65423	0.994741	0.221121	4.0288
GOTERM_BP_FAT	GO:0030278~regulation of ossification	9	1.63636	0.00244415	BMP4, ACVR2A, PLA2G4A, PTGER4, CD276, TGFB3, MGP, GDF10, AXIN2	411	78	13528	3.79787	0.995639	0.218898	4.16948
GOTERM_BP_FAT	GO:0000279~M phase	21	3.81818	0.0025356	MKI67, HSD3B7, DLGAP5, CENPF, NUSAP1, TTK, CDC20, CENPE, BIRC5, PTTG1, KLHDC3, CDC25B, CCNB1, CCNB2, MAPRE2, SKA1, STMN1, DYNC1H1, CIT, NEK6, ASPM	411	329	13528	2.10095	0.996443	0.217422	4.32226
GOTERM_BP_FAT	GO:0070167~regulation of biomineral formation	6	1.09091	0.00255755	BMP4, ACVR2A, PLA2G4A, CD276, TGFB3, MGP	411	32	13528	6.17153	0.996612	0.210995	4.3589
GOTERM_BP_FAT	GO:0060349~bone morphogenesis	5	0.909091	0.00273945	PTHLH, COL13A1, TGFB3, ACP5, COL1A1	411	20	13528	8.22871	0.997741	0.216283	4.662
GOTERM_BP_FAT	GO:0009719~response to endogenous stimulus	24	4.36364	0.00296073	BMP4, ADCY4, KAT2B, LDLR, LEPR, AARS, HMGCS1, TGFB3, GGH, MGP, AQP1, LPIN1, ABCB4, WNT2, HDAC5, ZFP106, PLA2G4A, SLC1A2, ANG, FABP3, PCSK9, WFDC1, TGFBR3, COL1A1	411	405	13528	1.95051	0.99862	0.223757	5.0295
GOTERM_BP_FAT	GO:0007059~chromosome segregation	9	1.63636	0.00309998	DLGAP5, CENPF, NUSAP1, BIRC5, CENPE, SKA1, PTTG1, TOP2A, NEK6	411	81	13528	3.6572	0.998988	0.225392	5.26006
GOTERM_BP_FAT	GO:0022403~cell cycle phase	24	4.36364	0.00376619	MKI67, HSD3B7, DLGAP5, PIM1, CENPF, NUSAP1, TTK, CDC20, CENPE, BIRC5, PTTG1, CDKN3, KLHDC3, CDC25B, CCNB1, PRUNE2, CCNB2, MAPRE2, STMN1, SKA1, DYNC1H1, CIT, NEK6, ASPM	411	414	13528	1.90811	0.999771	0.258666	6.35592
GOTERM_BP_FAT	GO:0030071~regulation of mitotic metaphase/anaphase transition	5	0.909091	0.00394298	DLGAP5, CENPF, TTK, CENPE, NEK6	411	22	13528	7.48065	0.999845	0.261087	6.64471
GOTERM_BP_FAT	GO:0051129~negative regulation of cellular component organization	12	2.18182	0.00396163	CLU, TTK, CENPF, CENPE, MBP, ARHGAP6, TMSB15A, GSN, CAPG, TMSB15B, TGFBR3, SEMA3A, ARAP1	411	142	13528	2.78154	0.999852	0.25463	6.67512
GOTERM_BP_FAT	GO:0030198~extracellular matrix organization	10	1.81818	0.00429223	COL14A1, LUM, OLFML2A, COL12A1, FKBP1A, DCN, COL1A1, COL8A2, EMILIN1, DPT	411	104	13528	3.16489	0.999929	0.265216	7.21275
GOTERM_BP_FAT	GO:0042364~water-soluble vitamin biosynthetic process	5	0.909091	0.00466054	TPK1, PDXK, AKR1A1, QPRT, MMAB	411	23	13528	7.1554	0.999969	0.276914	7.80827
GOTERM_BP_FAT	GO:0051656~establishment of organelle localization	8	1.45455	0.00478065	KIF1B, CENPA, DLGAP5, CENPF, NUSAP1, BIRC5, CENPE, COPE	411	69	13528	3.81621	0.999976	0.275681	8.00169
GOTERM_BP_FAT	GO:0031577~spindle checkpoint	4	0.727273	0.00495793	CENPF, TTK, BIRC5, CENPE	411	12	13528	10.9716	0.999984	0.277238	8.28649
GOTERM_BP_FAT	GO:0045778~positive regulation of ossification	5	0.909091	0.00546092	BMP4, ACVR2A, PLA2G4A, CD276, TGFB3	411	24	13528	6.85726	0.999995	0.293537	9.09
GOTERM_BP_FAT	GO:0048705~skeletal system morphogenesis	10	1.81818	0.00695502	PTHLH, OSR2, BMP1, COL13A1, PRRX1, TGFB3, ACP5, MGP, COL1A1, GAS1	411	112	13528	2.93883	1	0.349871	11.4378
GOTERM_BP_FAT	GO:0000280~nuclear division	15	2.72727	0.00726562	DLGAP5, NUSAP1, CENPF, CENPE, CDC20, BIRC5, PTTG1, CDC25B, CCNB1, CCNB2, MAPRE2, SKA1, CIT, NEK6, ASPM	411	220	13528	2.24419	1	0.354497	11.9187
GOTERM_BP_FAT	GO:0007067~mitosis	15	2.72727	0.00726562	DLGAP5, NUSAP1, CENPF, CENPE, CDC20, BIRC5, PTTG1, CDC25B, CCNB1, CCNB2, MAPRE2, SKA1, CIT, NEK6, ASPM	411	220	13528	2.24419	1	0.354497	11.9187
GOTERM_BP_FAT	GO:0009725~response to hormone stimulus	21	3.81818	0.00845837	BMP4, ADCY4, KAT2B, LDLR, LEPR, TGFB3, GGH, MGP, AQP1, LPIN1, ABCB4, WNT2, HDAC5, ZFP106, PLA2G4A, ANG, FABP3, WFDC1, TGFBR3, PCSK9, COL1A1	411	367	13528	1.88341	1	0.391326	13.7424
GOTERM_BP_FAT	GO:0000087~M phase of mitotic cell cycle	15	2.72727	0.00858404	DLGAP5, NUSAP1, CENPF, CENPE, CDC20, BIRC5, PTTG1, CDC25B, CCNB1, CCNB2, MAPRE2, SKA1, CIT, NEK6, ASPM	411	224	13528	2.20412	1	0.387962	13.9325
GOTERM_BP_FAT	GO:0001957~intramembranous ossification	3	0.545455	0.00862327	CTSK, COL1A1, AXIN2	411	5	13528	19.7489	1	0.381763	13.9917
GOTERM_BP_FAT	GO:0000278~mitotic cell cycle	21	3.81818	0.00919438	DLGAP5, PIM1, CENPF, NUSAP1, TTK, CDC20, CENPE, BIRC5, PTTG1, CDKN3, CDC25B, CCNB1, CCNB2, CENPA, MAPRE2, STMN1, SKA1, DYNC1H1, CIT, NEK6, ASPM	411	370	13528	1.86814	1	0.393694	14.85
GOTERM_BP_FAT	GO:0009110~vitamin biosynthetic process	5	0.909091	0.00956821	TPK1, PDXK, AKR1A1, QPRT, MMAB	411	28	13528	5.87765	1	0.39855	15.4074
GOTERM_BP_FAT	GO:0050000~chromosome localization	4	0.727273	0.00958526	DLGAP5, CENPF, BIRC5, CENPE	411	15	13528	8.77729	1	0.391938	15.4327
GOTERM_BP_FAT	GO:0051303~establishment of chromosome localization	4	0.727273	0.00958526	DLGAP5, CENPF, BIRC5, CENPE	411	15	13528	8.77729	1	0.391938	15.4327
GOTERM_BP_FAT	GO:0048285~organelle fission	15	2.72727	0.0101603	DLGAP5, NUSAP1, CENPF, CENPE, CDC20, BIRC5, PTTG1, CDC25B, CCNB1, CCNB2, MAPRE2, SKA1, CIT, NEK6, ASPM	411	229	13528	2.15599	1	0.402789	16.2831
GOTERM_BP_FAT	GO:0030199~collagen fibril organization	5	0.909091	0.0108392	COL14A1, LUM, COL12A1, COL1A1, DPT	411	29	13528	5.67497	1	0.416023	17.2768
GOTERM_BP_FAT	GO:0043062~extracellular structure organization	12	2.18182	0.0108705	DNM3, COL14A1, MYO6, LUM, OLFML2A, COL12A1, FKBP1A, DCN, COL1A1, COL8A2, EMILIN1, DPT	411	163	13528	2.42318	1	0.410057	17.3224
GOTERM_BP_FAT	GO:0010639~negative regulation of organelle organization	8	1.45455	0.0120725	ARHGAP6, TMSB15A, GSN, TMSB15B, CAPG, CENPF, TTK, CENPE, ARAP1	411	82	13528	3.2112	1	0.436709	19.0536
	Down-regulated genes
Category	Term	Count	%	PValue	Genes	List Total	Pop Hits	Pop Total	Fold Enrichment	Bonferroni	Benjamini	FDR
GOTERM_BP_FAT	GO:0070482~response to oxygen levels	22	3.98551	7.39e-09	KCNMA1, ATP1B1, SLC8A1, CCL2, EPAS1, OXTR, BNIP3, ITPR1, SOD2, CITED2, DDIT4, HYOU1, LONP1, HSP90B1, HIF1A, TFRC, PLOD2, HMOX1, VEGFA, ALDH2, THBS1, VLDLR	449	141	13528	4.70101	1.92e-05	1.92e-05	1.31e-05
GOTERM_BP_FAT	GO:0006916~anti-apoptosis	26	4.71014	2.02e-08	IER3, CCL2, BNIP3, CITED2, BDNF, HMOX1, TGM2, HSPA5, THBS1, NRG1, MYC, ARHGDIA, HSPA9, SOD2, CDH13, ATF5, HSP90B1, SFRP1, TNFRSF10D, F3, BNIP3L, VEGFA, FOXC1, TNFAIP3, PRNP, NGF	449	206	13528	3.80271	5.23e-05	2.61e-05	3.57e-05
GOTERM_BP_FAT	GO:0001666~response to hypoxia	20	3.62319	8.67e-08	KCNMA1, ATP1B1, SLC8A1, CCL2, EPAS1, BNIP3, ITPR1, SOD2, CITED2, DDIT4, HYOU1, LONP1, HSP90B1, HIF1A, TFRC, PLOD2, HMOX1, VEGFA, THBS1, VLDLR	449	134	13528	4.49689	0.000225	7.5e-05	0.000154
GOTERM_BP_FAT	GO:0042127~regulation of cell proliferation	54	9.78261	6.03e-07	BMI1, PTGS2, INS-IGF2, IL15, PAWR, MXI1, WARS, S1PR3, BDNF, ARHGAP5, S1PR1, FXN, HMOX1, HLX, SERPINE1, NRG1, MYC, FGF2, ARHGEF2, IRS2, CGRRF1, PDCD1LG2, CCND1, HIF1A, IL20RB, CCND2, SSTR1, F3, VEGFA, ADAMTS1, NGF, CXCL1, CCL2, CXCL5, SOX9, CALR, TGM2, THBS1, PGGT1B, ODC1, IL6, TNFSF4, IL8, IGF2, STAT1, SOD2, CDH13, ID2, EEF1E1, BNC1, ID4, PTCH1, IGFBP3, HTR2A, IGFBP5	449	787	13528	2.06731	0.00156395	0.000391	0.00106889
GOTERM_BP_FAT	GO:0009611~response to wounding	41	7.42754	1e-06	CXCL1, JUB, CCL2, NDST1, INS-IGF2, CXCL3, PABPC4, CXCL2, CXCL6, IL15, TIMP3, CCL7, S1PR3, FOS, HMOX1, SERPINE1, PTX3, THBS1, NRG1, TFPI2, FGF2, FN1, NFKBIZ, IL6, TNFSF4, MAP2K1, IL8, CHST2, IGF2, SOD2, TNFAIP6, THBD, HIF1A, IL20RB, TFRC, GNAQ, F3, KIAA1715, AOX1, TFPI, BMP6, NGF	449	530	13528	2.33075	0.00259916	0.00052	0.00177732
GOTERM_BP_FAT	GO:0010033~response to organic substance	50	9.05797	1.28e-06	PTGS2, INS-IGF2, PMAIP1, FOS, HSPH1, TNFRSF11B, EIF4EBP1, HMOX1, DNAJC3, MYC, CYR61, KCNMA1, EGR1, IRS2, EGR2, CCND1, THBD, CCND2, HSPB7, NGF, ME1, CCL2, FHL2, OXTR, TRIM16, ASNS, EDEM1, TIMP3, MANF, GCH1, GLRX2, TAP2, PPP3CA, THBS1, PGGT1B, IL6, SLC8A1, ACTC1, MAP2K1, IGF2, RCAN1, STAT1, CDH13, TFRC, ID2, DUSP1, KCNJ8, ID1, ALDH2, PTCH1, VLDLR	449	721	13528	2.0894	0.0033122	0.000553	0.00226572
GOTERM_BP_FAT	GO:0043066~negative regulation of apoptosis	31	5.61594	2.4e-06	IER3, CCL2, INS-IGF2, BNIP3, ASNS, GCLM, CITED2, BDNF, HMOX1, TGM2, HSPA5, THBS1, NRG1, MYC, ARHGDIA, HSPA9, IL6, IGF2, SOD2, CDH13, ATF5, HSP90B1, KRT18, SFRP1, TNFRSF10D, F3, VEGFA, BNIP3L, FOXC1, TNFAIP3, PRNP, NGF	449	354	13528	2.63843	0.00620613	0.000889	0.00425144
GOTERM_BP_FAT	GO:0008284~positive regulation of cell proliferation	34	6.15942	2.9e-06	BMI1, CCL2, CXCL5, PTGS2, INS-IGF2, IL15, CALR, S1PR3, ARHGAP5, S1PR1, FXN, HLX, TGM2, NRG1, MYC, FGF2, PGGT1B, ODC1, IRS2, IL6, TNFSF4, IGF2, STAT1, PDCD1LG2, CDH13, CCND1, HIF1A, ID2, CCND2, F3, VEGFA, BNC1, ID4, NGF, HTR2A	449	414	13528	2.47438	0.00748278	0.000938	0.00512927
GOTERM_BP_FAT	GO:0043069~negative regulation of programmed cell death	31	5.61594	3.19e-06	IER3, CCL2, INS-IGF2, BNIP3, ASNS, GCLM, CITED2, BDNF, HMOX1, TGM2, HSPA5, THBS1, NRG1, MYC, ARHGDIA, HSPA9, IL6, IGF2, SOD2, CDH13, ATF5, HSP90B1, KRT18, SFRP1, TNFRSF10D, F3, VEGFA, BNIP3L, FOXC1, TNFAIP3, PRNP, NGF	449	359	13528	2.60168	0.00823583	0.000918	0.00564759
GOTERM_BP_FAT	GO:0060548~negative regulation of cell death	31	5.61594	3.38e-06	IER3, CCL2, INS-IGF2, BNIP3, ASNS, GCLM, CITED2, BDNF, HMOX1, TGM2, HSPA5, THBS1, NRG1, MYC, ARHGDIA, HSPA9, IL6, IGF2, SOD2, CDH13, ATF5, HSP90B1, KRT18, SFRP1, TNFRSF10D, F3, VEGFA, BNIP3L, FOXC1, TNFAIP3, PRNP, NGF	449	360	13528	2.59446	0.00872656	0.000876	0.00598556
GOTERM_BP_FAT	GO:0007584~response to nutrient	18	3.26087	3.76e-06	SLC8A1, CCL2, PTGS2, STC2, GDAP1, TRIM16, STAT1, TIMP3, TNFRSF11B, CCND1, DUSP1, TFRC, SSTR1, HMOX1, STC1, PTCH1, VLDLR, MEST	449	140	13528	3.87375	0.00970671	0.000886	0.00666112
GOTERM_BP_FAT	GO:0009991~response to extracellular stimulus	23	4.16667	3.97e-06	SLC8A1, CCL2, PTGS2, STC2, GDAP1, TRIM16, ASNS, STAT1, TIMP3, SOD2, GLRX2, FOS, TNFRSF11B, CCND1, DUSP1, TFRC, SSTR1, HMOX1, STC1, PTCH1, HSPA5, MEST, VLDLR	449	220	13528	3.14987	0.0102551	0.000859	0.00703936
GOTERM_BP_FAT	GO:0040017~positive regulation of locomotion	15	2.71739	4e-06	IRS2, IL6, IL8, MAP2K1, INS-IGF2, IGF2, CDH13, S1PR1, HIF1A, ARHGAP5, F3, PTP4A1, RRAS2, VEGFA, THBS1, FGF2	449	98	13528	4.61161	0.010315	0.000797	0.0070807
GOTERM_BP_FAT	GO:0045765~regulation of angiogenesis	12	2.17391	6.05e-06	WARS, GATA2, IL6, COL4A2, HIF1A, ID1, HMOX1, F3, SERPINE1, THBS1, FGF2, DDAH1	449	63	13528	5.73889	0.0155589	0.00111946	0.0107085
GOTERM_BP_FAT	GO:0030335~positive regulation of cell migration	14	2.53623	6.87e-06	IRS2, IL6, MAP2K1, INS-IGF2, IGF2, CDH13, S1PR1, HIF1A, ARHGAP5, F3, PTP4A1, RRAS2, VEGFA, THBS1, FGF2	449	89	13528	4.73942	0.017675	0.00118816	0.0121779
GOTERM_BP_FAT	GO:0031667~response to nutrient levels	21	3.80435	8.66e-06	SLC8A1, CCL2, PTGS2, STC2, GDAP1, ASNS, TRIM16, STAT1, TIMP3, SOD2, TNFRSF11B, CCND1, DUSP1, TFRC, SSTR1, HMOX1, STC1, PTCH1, HSPA5, MEST, VLDLR	449	197	13528	3.21174	0.0222123	0.00140293	0.0153391
GOTERM_BP_FAT	GO:0006954~inflammatory response	28	5.07246	1.11e-05	CXCL1, CCL2, NDST1, INS-IGF2, CXCL3, CXCL2, IL15, CXCL6, CCL7, FOS, S1PR3, HMOX1, THBS1, PTX3, FN1, NFKBIZ, IL6, TNFSF4, IL8, CHST2, IGF2, TNFAIP6, HIF1A, IL20RB, TFRC, F3, AOX1, BMP6, NGF	449	325	13528	2.59574	0.0283544	0.00169058	0.0196418
GOTERM_BP_FAT	GO:0030334~regulation of cell migration	19	3.44203	1.26e-05	JUB, IRS2, IL6, MAP2K1, INS-IGF2, IGF2, CITED2, CDH13, S1PR1, HIF1A, ARHGAP5, HMOX1, F3, PTP4A1, RRAS2, VEGFA, THBS1, IGFBP3, FGF2, IGFBP5	449	169	13528	3.3873	0.0321714	0.00181503	0.0223293
GOTERM_BP_FAT	GO:0048660~regulation of smooth muscle cell proliferation	10	1.81159	1.64e-05	CDH13, IL6, S1PR1, PTGS2, VEGFA, TGM2, IL15, STAT1, IGFBP3, IGFBP5	449	46	13528	6.54982	0.0415801	0.00223273	0.0289992
GOTERM_BP_FAT	GO:0051272~positive regulation of cell motion	14	2.53623	2e-05	IRS2, IL6, MAP2K1, INS-IGF2, IGF2, CDH13, S1PR1, HIF1A, ARHGAP5, F3, PTP4A1, RRAS2, VEGFA, THBS1, FGF2	449	98	13528	4.30417	0.0506763	0.00259689	0.0355095
GOTERM_BP_FAT	GO:0040012~regulation of locomotion	20	3.62319	2.09e-05	JUB, IRS2, IL6, MAP2K1, IL8, INS-IGF2, IGF2, CITED2, CDH13, S1PR1, HIF1A, ARHGAP5, HMOX1, F3, PTP4A1, RRAS2, VEGFA, THBS1, IGFBP3, FGF2, IGFBP5	449	192	13528	3.13846	0.0526535	0.00257242	0.0369328
GOTERM_BP_FAT	GO:0008219~cell death	46	8.33333	2.91e-05	IER3, TNFRSF21, CADM1, INS-IGF2, GULP1, BNIP3, TRIB3, PMAIP1, PAWR, STK17A, RTN3, GLRX2, LOC652797, TNFRSF11B, UNC5B, GATA6, HMOX1, TGM2, C8ORF4, THBS1, MYC, FGF2, FAM176A, RNF144B, ARHGEF2, ACTC1, IL6, DNM1L, SLC33A1, AIMP2, IGF2, STAT1, ITPR1, DDIT4, SOD2, PHF17, KRT18, TNFRSF10D, PKM2, F3, HSPB8, BNIP3L, SULF1, SIAH2, TNFAIP3, DRAM1, NGF, HTR2A	449	719	13528	1.9276	0.0726649	0.00342323	0.0515068
GOTERM_BP_FAT	GO:0042493~response to drug	21	3.80435	3.37e-05	SLC8A1, ACTC1, CCL2, PTGS2, CTPS, OXTR, SRP19, STAT1, GCLM, SOD2, SS18, FOS, ABCC9, TNFRSF11B, BDNF, CCND1, ALDH1A3, SEMA3C, PTCH1, HTR2A, NGF	449	216	13528	2.92923	0.0836219	0.00378959	0.0596195
GOTERM_BP_FAT	GO:0016265~death	46	8.33333	3.37e-05	IER3, TNFRSF21, CADM1, INS-IGF2, GULP1, BNIP3, TRIB3, PMAIP1, PAWR, STK17A, RTN3, GLRX2, LOC652797, TNFRSF11B, UNC5B, GATA6, HMOX1, TGM2, C8ORF4, THBS1, MYC, FGF2, FAM176A, RNF144B, ARHGEF2, ACTC1, IL6, DNM1L, SLC33A1, AIMP2, IGF2, STAT1, ITPR1, DDIT4, SOD2, PHF17, KRT18, TNFRSF10D, PKM2, F3, HSPB8, BNIP3L, SULF1, SIAH2, TNFAIP3, DRAM1, NGF, HTR2A	449	724	13528	1.91428	0.0837076	0.00363586	0.0596834
GOTERM_BP_FAT	GO:0043067~regulation of programmed cell death	49	8.87681	6.56e-05	IER3, PTGS2, CADM1, INS-IGF2, BNIP3, PMAIP1, PAWR, CITED2, BDNF, HMOX1, NRG1, MYC, FGF2, KCNMA1, ARHGEF2, KRT18, TNFRSF10D, F3, VEGFA, FOXC1, TNFAIP3, PRNP, NGF, CCL2, ASNS, STK17A, SOX9, CALR, GCLM, TIMP3, GCH1, ALDH1A3, TGM2, HSPA5, THBS1, ARHGDIA, HSPA9, IL6, CEBPG, IGF2, STAT1, SOD2, ATF5, CDH13, HSP90B1, SFRP1, DUSP1, EEF1E1, BNIP3L, IGFBP3	449	812	13528	1.81814	0.156578	0.00678836	0.116226
GOTERM_BP_FAT	GO:0012501~programmed cell death	40	7.24638	6.66e-05	IER3, TNFRSF21, CADM1, GULP1, TRIB3, BNIP3, PMAIP1, PAWR, STK17A, RTN3, GLRX2, LOC652797, TNFRSF11B, UNC5B, GATA6, TGM2, C8ORF4, THBS1, MYC, FGF2, FAM176A, RNF144B, ARHGEF2, ACTC1, IL6, DNM1L, AIMP2, STAT1, DDIT4, SOD2, PHF17, KRT18, TNFRSF10D, PKM2, F3, BNIP3L, SULF1, SIAH2, TNFAIP3, DRAM1, NGF	449	611	13528	1.97245	0.158615	0.00662051	0.117875
GOTERM_BP_FAT	GO:0010941~regulation of cell death	49	8.87681	7.13e-05	IER3, PTGS2, CADM1, INS-IGF2, BNIP3, PMAIP1, PAWR, CITED2, BDNF, HMOX1, NRG1, MYC, FGF2, KCNMA1, ARHGEF2, KRT18, TNFRSF10D, F3, VEGFA, FOXC1, TNFAIP3, PRNP, NGF, CCL2, ASNS, STK17A, SOX9, CALR, GCLM, TIMP3, GCH1, ALDH1A3, TGM2, HSPA5, THBS1, ARHGDIA, HSPA9, IL6, CEBPG, IGF2, STAT1, SOD2, ATF5, CDH13, HSP90B1, SFRP1, DUSP1, EEF1E1, BNIP3L, IGFBP3	449	815	13528	1.81145	0.168915	0.00682927	0.126277
GOTERM_BP_FAT	GO:0051270~regulation of cell motion	19	3.44203	7.48e-05	JUB, IRS2, IL6, MAP2K1, INS-IGF2, IGF2, CITED2, CDH13, S1PR1, HIF1A, ARHGAP5, HMOX1, F3, PTP4A1, RRAS2, VEGFA, THBS1, IGFBP3, FGF2, IGFBP5	449	193	13528	2.96608	0.176457	0.00690955	0.132495
GOTERM_BP_FAT	GO:0009719~response to endogenous stimulus	30	5.43478	8.35e-05	ME1, CCL2, PTGS2, INS-IGF2, FHL2, OXTR, TRIM16, ASNS, TIMP3, FOS, TNFRSF11B, EIF4EBP1, HMOX1, PPP3CA, THBS1, KCNMA1, IL6, IRS2, EGR2, MAP2K1, IGF2, RCAN1, STAT1, CDH13, CCND1, DUSP1, CCND2, ALDH2, PTCH1, VLDLR, NGF	449	405	13528	2.23179	0.194702	0.00743917	0.147773
GOTERM_BP_FAT	GO:0042981~regulation of apoptosis	48	8.69565	0.000103	IER3, PTGS2, CADM1, INS-IGF2, BNIP3, PAWR, PMAIP1, CITED2, BDNF, HMOX1, NRG1, MYC, KCNMA1, ARHGEF2, KRT18, TNFRSF10D, F3, VEGFA, FOXC1, PRNP, TNFAIP3, NGF, CCL2, ASNS, STK17A, SOX9, CALR, GCLM, TIMP3, GCH1, ALDH1A3, TGM2, HSPA5, THBS1, ARHGDIA, HSPA9, IL6, CEBPG, IGF2, STAT1, SOD2, ATF5, CDH13, HSP90B1, DUSP1, SFRP1, EEF1E1, BNIP3L, IGFBP3	449	804	13528	1.79876	0.233718	0.00883424	0.181633
GOTERM_BP_FAT	GO:0051094~positive regulation of developmental process	23	4.16667	0.000146	IRX3, IL6, MAP2K1, INS-IGF2, OXTR, IGF2, TRIM16, IL7R, NRCAM, GATA2, BDNF, HIF1A, ID2, GATA6, F3, HLX, NRG1, THBS1, IGFBP3, FGF2, DDAH1, ARHGDIA, BMP6, NGF	449	278	13528	2.4927	0.315218	0.0121404	0.258259
GOTERM_BP_FAT	GO:0006915~apoptosis	38	6.88406	0.000218	TNFRSF21, IER3, CADM1, GULP1, TRIB3, BNIP3, PMAIP1, PAWR, STK17A, RTN3, GLRX2, TNFRSF11B, UNC5B, GATA6, C8ORF4, THBS1, MYC, FGF2, FAM176A, RNF144B, ARHGEF2, IL6, ACTC1, DNM1L, AIMP2, STAT1, DDIT4, SOD2, PHF17, KRT18, TNFRSF10D, F3, BNIP3L, SULF1, SIAH2, TNFAIP3, DRAM1, NGF	449	602	13528	1.90184	0.431793	0.0175096	0.385293
GOTERM_BP_FAT	GO:0048545~response to steroid hormone stimulus	18	3.26087	0.000221	KCNMA1, IL6, CCL2, MAP2K1, PTGS2, OXTR, RCAN1, TIMP3, FOS, CCND1, TNFRSF11B, DUSP1, CCND2, HMOX1, ALDH2, PTCH1, THBS1, NGF	449	192	13528	2.82461	0.436618	0.0172375	0.391094
GOTERM_BP_FAT	GO:0009725~response to hormone stimulus	27	4.8913	0.000228	ME1, CCL2, PTGS2, INS-IGF2, FHL2, OXTR, TRIM16, TIMP3, FOS, TNFRSF11B, EIF4EBP1, HMOX1, THBS1, KCNMA1, IL6, IRS2, EGR2, MAP2K1, RCAN1, IGF2, STAT1, CCND1, DUSP1, CCND2, ALDH2, PTCH1, VLDLR, NGF	449	367	13528	2.21659	0.446588	0.017251	0.403239
GOTERM_BP_FAT	GO:0048514~blood vessel morphogenesis	19	3.44203	0.000233	IL8, EPAS1, NAA15, CDH2, CITED2, CDH13, S1PR1, HIF1A, BGN, ID1, HMOX1, VEGFA, TGM2, SEMA3C, FOXC1, THBS1, FGF2, C1GALT1, CYR61	449	211	13528	2.71305	0.453294	0.0171047	0.411532
GOTERM_BP_FAT	GO:0033273~response to vitamin	10	1.81159	0.000306	CCND1, CCL2, PTGS2, DUSP1, TFRC, GDAP1, TRIM16, PTCH1, TIMP3, MEST	449	66	13528	4.56503	0.548223	0.0218295	0.54116
GOTERM_BP_FAT	GO:0050921~positive regulation of chemotaxis	7	1.26812	0.000317	CDH13, IL6, S1PR1, IL8, F3, VEGFA, THBS1	449	29	13528	7.27256	0.5604	0.0219683	0.559717
GOTERM_BP_FAT	GO:0001889~liver development	9	1.63043	0.000325	CCND1, CADM1, CCND2, GATA6, HLX, CEBPG, ALDH2, SOD2, CITED2	449	53	13528	5.11628	0.569881	0.0219578	0.574523
GOTERM_BP_FAT	GO:0007156~homophilic cell adhesion	14	2.53623	0.000403	PCDHA6, PCDHA7, PCDHA8, PCDHA9, CADM1, PCDHA2, PCDHA3, PCDHA4, PCDHA5, CDH2, PCDHA1, PCDHAC2, PCDHAC1, CDH13, PCDHA10, PCDHA11, PCDHA12, PCDHA13, CDH11	449	131	13528	3.21991	0.64872	0.0264683	0.71191
GOTERM_BP_FAT	GO:0050920~regulation of chemotaxis	7	1.26812	0.000464	CDH13, IL6, S1PR1, IL8, F3, VEGFA, THBS1	449	31	13528	6.80336	0.70018	0.0296654	0.819258
GOTERM_BP_FAT	GO:0048661~positive regulation of smooth muscle cell proliferation	7	1.26812	0.000464	CDH13, IL6, S1PR1, PTGS2, VEGFA, TGM2, STAT1	449	31	13528	6.80336	0.70018	0.0296654	0.819258
GOTERM_BP_FAT	GO:0015804~neutral amino acid transport	6	1.08696	0.000511	SLC1A4, SLC1A5, SLC6A9, SLC3A2, SLC38A1, SLC7A5	449	21	13528	8.60834	0.734202	0.0318009	0.900808
GOTERM_BP_FAT	GO:0002237~response to molecule of bacterial origin	11	1.99275	0.000535	FOS, IL6, CCL2, THBD, PTGS2, KCNJ8, TAP2, STAT1, VLDLR, GCH1, NGF	449	86	13528	3.85373	0.750478	0.0325123	0.943563
GOTERM_BP_FAT	GO:0042060~wound healing	17	3.07971	0.000621	JUB, IL6, INS-IGF2, PABPC4, IGF2, TIMP3, HIF1A, THBD, GNAQ, HMOX1, F3, KIAA1715, SERPINE1, TFPI, NRG1, TFPI2, FGF2, FN1	449	191	13528	2.68165	0.800473	0.03679	1.09471
GOTERM_BP_FAT	GO:0001944~vasculature development	20	3.62319	0.000712	IL8, EPAS1, EFNB2, NAA15, CDH2, CITED2, CDH13, S1PR1, HIF1A, BGN, ID1, HMOX1, VEGFA, TGM2, SEMA3C, FOXC1, THBS1, FGF2, C1GALT1, CYR61	449	251	13528	2.40073	0.842411	0.0411252	1.25396
GOTERM_BP_FAT	GO:0050795~regulation of behavior	8	1.44928	0.000729	CDH13, IL6, S1PR1, PTGDS, IL8, F3, VEGFA, THBS1	449	46	13528	5.23986	0.849214	0.0411705	1.28371
GOTERM_BP_FAT	GO:0048520~positive regulation of behavior	7	1.26812	0.00078	CDH13, IL6, S1PR1, IL8, F3, VEGFA, THBS1	449	34	13528	6.20307	0.8678	0.0430344	1.37235
GOTERM_BP_FAT	GO:0001974~blood vessel remodeling	6	1.08696	0.0008	BGN, EPAS1, VEGFA, TGM2, SEMA3C, FOXC1	449	23	13528	7.85979	0.874424	0.0431853	1.40697
GOTERM_BP_FAT	GO:0051789~response to protein stimulus	12	2.17391	0.000824	EGR1, FOS, HSPH1, CCND1, ID2, ID1, HSPB7, DNAJC3, EDEM1, PGGT1B, MANF, CYR61	449	107	13528	3.37897	0.882295	0.0435956	1.45055
GOTERM_BP_FAT	GO:0007610~behavior	30	5.43478	0.000957	CXCL1, CCL2, CXCL5, PTGS2, CXCL3, UCHL1, CXCL2, OXTR, CXCL6, CCL7, FOS, BDNF, NPAS2, FXN, PLCB1, FGF2, CYR61, EGR1, KCNMA1, IL6, EGR2, MAP2K1, IL8, SOD2, GNAQ, PTGDS, GRIA1, HTR2A, VLDLR, NGF	449	469	13528	1.92724	0.916589	0.0494299	1.68206
GOTERM_BP_FAT	GO:0006979~response to oxidative stress	15	2.71739	0.00111251	SLC8A1, PTGS2, EPAS1, MAP2K1, STAT1, GCLM, SOD2, GLRX2, FOS, LONP1, HIF1A, DUSP1, HMOX1, SERPINE1, PRNP	449	164	13528	2.75572	0.944282	0.0561132	1.9526
GOTERM_BP_FAT	GO:0006928~cell motion	30	5.43478	0.00114577	PVR, JUB, CCL2, PTGS2, CXCL3, SPOCK1, CDH2, NRCAM, ALCAM, ACTR2, BDNF, DAB1, UNC5B, SPINT2, SEMA3C, THBS1, FGF2, ARHGDIA, FN1, IL6, EGR2, MAP2K1, IL8, PODXL, NFASC, CDH13, HIF1A, ID1, SIX1, FOXC1	449	475	13528	1.9029	0.948893	0.0566431	2.01043
GOTERM_BP_FAT	GO:0001938~positive regulation of endothelial cell proliferation	5	0.905797	0.00121121	CDH13, HIF1A, CCL2, F3, VEGFA	449	15	13528	10.0431	0.956881	0.0586662	2.12409
GOTERM_BP_FAT	GO:0006952~defense response	36	6.52174	0.0012626	CXCL1, CCL2, NDST1, INS-IGF2, CXCL3, CXCL2, BNIP3, CXCL6, IL15, CCL7, GCH1, FOS, S1PR3, HMOX1, TAP2, PTX3, THBS1, FN1, NFKBIZ, IL18R1, IL6, TNFSF4, IL8, CEBPG, CHST2, IGF2, TNFAIP6, ABCC9, HIF1A, IL20RB, TFRC, KCNJ8, F3, BNIP3L, AOX1, BMP6, NGF	449	615	13528	1.76366	0.962268	0.0599618	2.21325
GOTERM_BP_FAT	GO:0010035~response to inorganic substance	17	3.07971	0.00132839	KCNMA1, SLC8A1, PTGS2, STAT1, SOD2, GLRX2, FOS, CCND1, TNFRSF11B, DUSP1, FXN, TFRC, HMOX1, SERPINE1, NDRG1, THBS1, PRNP	449	205	13528	2.49852	0.968195	0.0618584	2.32731
GOTERM_BP_FAT	GO:0001568~blood vessel development	19	3.44203	0.00136294	IL8, EPAS1, NAA15, CDH2, CITED2, CDH13, S1PR1, HIF1A, BGN, ID1, HMOX1, VEGFA, TGM2, SEMA3C, FOXC1, THBS1, FGF2, C1GALT1, CYR61	449	245	13528	2.33655	0.970925	0.0622998	2.38715
GOTERM_BP_FAT	GO:0009069~serine family amino acid metabolic process	6	1.08696	0.00144027	SEPHS2, SHMT2, PHGDH, PSAT1, GCLM, CBS	449	26	13528	6.95289	0.976216	0.0645836	2.52097
GOTERM_BP_FAT	GO:0045766~positive regulation of angiogenesis	6	1.08696	0.00144027	GATA2, HIF1A, F3, THBS1, FGF2, DDAH1	449	26	13528	6.95289	0.976216	0.0645836	2.52097
GOTERM_BP_FAT	GO:0045597~positive regulation of cell differentiation	18	3.26087	0.00164114	IRX3, IL6, MAP2K1, INS-IGF2, IGF2, TRIM16, IL7R, NRCAM, BDNF, HIF1A, ID2, GATA6, HLX, NRG1, IGFBP3, FGF2, ARHGDIA, BMP6, NGF	449	229	13528	2.36823	0.985886	0.0720224	2.86776
GOTERM_BP_FAT	GO:0007613~memory	7	1.26812	0.00164521	PTGS2, GRIA1, OXTR, PLCB1, VLDLR, HTR2A, NGF	449	39	13528	5.4078	0.986035	0.0709951	2.87477
GOTERM_BP_FAT	GO:0006563~L-serine metabolic process	4	0.724638	0.00178413	SHMT2, PHGDH, PSAT1, CBS	449	8	13528	15.0646	0.990266	0.0755085	3.11392
GOTERM_BP_FAT	GO:0009612~response to mechanical stimulus	8	1.44928	0.00237872	FOS, CCL2, RCAN1, PTCH1, STAT1, TIMP3, MYC, NGF	449	56	13528	4.30417	0.997925	0.0978394	4.13119
GOTERM_BP_FAT	GO:0043627~response to estrogen stimulus	11	1.99275	0.00249926	KCNMA1, CCND1, TNFRSF11B, PTGS2, DUSP1, CCND2, HMOX1, OXTR, RCAN1, PTCH1, TIMP3	449	105	13528	3.15639	0.998483	0.100947	4.33618
GOTERM_BP_FAT	GO:0045787~positive regulation of cell cycle	8	1.44928	0.00263612	CCND1, ID2, CCND2, INS-IGF2, IGF2, ASNS, CALR, PGGT1B, CITED2	449	57	13528	4.22866	0.998938	0.104558	4.56844
GOTERM_BP_FAT	GO:0003018~vascular process in circulatory system	8	1.44928	0.00291439	KCNMA1, ACTC1, KCNJ8, VEGFA, FOXC1, GCLM, SOD2, GCH1	449	58	13528	4.15575	0.999485	0.113234	5.03901
GOTERM_BP_FAT	GO:0050926~regulation of positive chemotaxis	5	0.905797	0.00309657	CDH13, S1PR1, IL8, F3, VEGFA	449	19	13528	7.92873	0.999679	0.118123	5.34592
GOTERM_BP_FAT	GO:0050927~positive regulation of positive chemotaxis	5	0.905797	0.00309657	CDH13, S1PR1, IL8, F3, VEGFA	449	19	13528	7.92873	0.999679	0.118123	5.34592
GOTERM_BP_FAT	GO:0051241~negative regulation of multicellular organismal process	14	2.53623	0.00318162	KCNMA1, IL6, PTGS2, INS-IGF2, IGF2, SOX9, TNFRSF11B, IL20RB, FXN, HMOX1, SERPINE1, VEGFA, PTCH1, THBS1, HTR2A	449	164	13528	2.572	0.999743	0.119419	5.48886
GOTERM_BP_FAT	GO:0048878~chemical homeostasis	30	5.43478	0.00347438	CCL2, INS-IGF2, OXTR, BNIP3, CALR, GCLM, CCL7, S1PR3, S1PR1, FXN, HMOX1, SERPINE1, TGM2, PPP3CA, MYC, KCNMA1, SLC8A1, IRS2, EGR2, EPAS1, IGF2, ITPR1, SOD2, HSP90B1, HIF1A, TFRC, GNAQ, VEGFA, STC1, PTCH1, PRNP	449	512	13528	1.76538	0.99988	0.127848	5.97938
GOTERM_BP_FAT	GO:0042592~homeostatic process	40	7.24638	0.00358802	CCL2, INS-IGF2, OXTR, BNIP3, CALR, IL7R, GCLM, CCL7, GLRX2, S1PR3, S1PR1, FXN, HMOX1, SERPINE1, TGM2, TCEA1, PPP3CA, MYC, KCNMA1, IL6, IRS2, SLC8A1, EGR2, EPAS1, CEBPG, IGF2, ITPR1, SOD2, HSP90B1, HIF1A, IL20RB, TFRC, ID2, GNAQ, RPS14, VEGFA, PTCH1, STC1, TXNRD1, PRNP, HTR2A	449	751	13528	1.60475	0.999911	0.129916	6.16914
GOTERM_BP_FAT	GO:0001936~regulation of endothelial cell proliferation	6	1.08696	0.00374627	CDH13, HIF1A, CCL2, F3, VEGFA, THBS1	449	32	13528	5.64922	0.999941	0.1334	6.43278
GOTERM_BP_FAT	GO:0007611~learning or memory	11	1.99275	0.00374861	EGR1, FOS, BDNF, EGR2, PTGS2, GRIA1, OXTR, PLCB1, VLDLR, HTR2A, NGF	449	111	13528	2.98577	0.999941	0.131676	6.43667
GOTERM_BP_FAT	GO:0001525~angiogenesis	13	2.35507	0.00376179	IL8, EPAS1, NAA15, CDH13, S1PR1, HIF1A, ID1, HMOX1, VEGFA, THBS1, FGF2, C1GALT1, CYR61	449	148	13528	2.64648	0.999943	0.13035	6.45861
GOTERM_BP_FAT	GO:0032570~response to progesterone stimulus	5	0.905797	0.00377075	FOS, CCL2, ALDH2, OXTR, THBS1	449	20	13528	7.53229	0.999945	0.128924	6.4735
GOTERM_BP_FAT	GO:0051607~defense response to virus	5	0.905797	0.00377075	ABCC9, IL6, KCNJ8, BNIP3L, BNIP3	449	20	13528	7.53229	0.999945	0.128924	6.4735
GOTERM_BP_FAT	GO:0032496~response to lipopolysaccharide	9	1.63043	0.00387323	FOS, CCL2, THBD, PTGS2, KCNJ8, STAT1, VLDLR, GCH1, NGF	449	77	13528	3.52159	0.999958	0.130481	6.64379
GOTERM_BP_FAT	GO:0032526~response to retinoic acid	6	1.08696	0.00429732	DUSP1, TFRC, GDAP1, TRIM16, PTCH1, MEST	449	33	13528	5.47803	0.999986	0.141897	7.34539
GOTERM_BP_FAT	GO:0008285~negative regulation of cell proliferation	23	4.16667	0.00450793	CXCL1, IL6, CGRRF1, IL8, PTGS2, IL15, PAWR, MXI1, PDCD1LG2, SOD2, WARS, CDH13, BDNF, IL20RB, SSTR1, HMOX1, EEF1E1, ADAMTS1, PTCH1, THBS1, IGFBP3, FGF2, IGFBP5	449	361	13528	1.91959	0.999992	0.146473	7.69196
GOTERM_BP_FAT	GO:0007626~locomotory behavior	19	3.44203	0.00456539	CXCL1, KCNMA1, IL6, CCL2, MAP2K1, IL8, CXCL5, CXCL3, UCHL1, CXCL2, CXCL6, CCL7, SOD2, NPAS2, PTGDS, FXN, FGF2, CYR61, NGF	449	274	13528	2.08925	0.999993	0.146375	7.78629
GOTERM_BP_FAT	GO:0009070~serine family amino acid biosynthetic process	4	0.724638	0.00488086	SEPHS2, PHGDH, PSAT1, CBS	449	11	13528	10.9561	0.999997	0.1538	8.30263
GOTERM_BP_FAT	GO:0016337~cell-cell adhesion	19	3.44203	0.00492455	PCDHA6, PVR, PCDHA7, PCDHA8, PCDHA9, CADM1, PCDHA2, PCDHA3, PCDHA4, PCDHA5, CDH2, PCDHA1, SOX9, PCDHAC2, PCDHAC1, NRCAM, CDH13, EZR, DAB1, PCDHA10, PCDHA11, PCDHA12, PCDHA13, CDH11	449	276	13528	2.07411	0.999997	0.153216	8.37393
GOTERM_BP_FAT	GO:0016477~cell migration	19	3.44203	0.00492455	PVR, JUB, IL6, CCL2, IL8, PODXL, CXCL3, CDH2, NRCAM, CDH13, DAB1, HIF1A, ID1, SIX1, SEMA3C, FOXC1, THBS1, FGF2, FN1	449	276	13528	2.07411	0.999997	0.153216	8.37393
GOTERM_BP_FAT	GO:0032103~positive regulation of response to external stimulus	8	1.44928	0.00508373	CDH13, IL6, S1PR1, IL8, F3, VEGFA, TGM2, THBS1	449	64	13528	3.76615	0.999998	0.155911	8.63324
GOTERM_BP_FAT	GO:0009309~amine biosynthetic process	9	1.63043	0.00528142	BCAT1, ODC1, SEPHS2, ASS1, PHGDH, ASNS, PSAT1, CBS, GCH1	449	81	13528	3.34769	0.999999	0.1596	8.95432
GOTERM_BP_FAT	GO:0034101~erythrocyte homeostasis	7	1.26812	0.00534184	ID2, EPAS1, HMOX1, RPS14, CEBPG, VEGFA, TCEA1	449	49	13528	4.30417	0.999999	0.159429	9.05222
GOTERM_BP_FAT	GO:0006417~regulation of translation	12	2.17391	0.00583394	EIF4EBP1, IL6, KRT7, TRMT6, EIF5, NANOS1, MKNK2, EIF1B, CALR, THBS1, FAM129A, IGFBP5	449	137	13528	2.63905	1	0.170869	9.84605
GOTERM_BP_FAT	GO:0030155~regulation of cell adhesion	12	2.17391	0.00583394	CDH13, DAB1, S1PR1, MAP2K1, IL8, PODXL, TGM2, NRG1, THBS1, ARHGDIA, CITED2, CYR61	449	137	13528	2.63905	1	0.170869	9.84605
GOTERM_BP_FAT	GO:0048872~homeostasis of number of cells	10	1.81159	0.00587178	IL6, ID2, IL20RB, EPAS1, HMOX1, RPS14, CEBPG, VEGFA, TCEA1, IL7R	449	100	13528	3.01292	1	0.169972	9.90682
GOTERM_BP_FAT	GO:0055066~di-, tri-valent inorganic cation homeostasis	17	3.07971	0.00609872	SLC8A1, CCL2, OXTR, CALR, ITPR1, CCL7, SOD2, S1PR3, HSP90B1, S1PR1, FXN, TFRC, HMOX1, TGM2, STC1, PRNP, MYC	449	239	13528	2.14308	1	0.174022	10.2705
GOTERM_BP_FAT	GO:0002697~regulation of immune effector process	10	1.81159	0.00626319	PVR, IL6, TNFSF4, CADM1, IL20RB, INS-IGF2, TAP2, HMOX1, IGF2, IL15, IL7R	449	101	13528	2.98309	1	0.17636	10.5331
GOTERM_BP_FAT	GO:0043619~regulation of transcription from RNA polymerase II promoter in response to oxidative stress	3	0.543478	0.0062809	HIF1A, EPAS1, HMOX1	449	4	13528	22.5969	1	0.174927	10.5614
GOTERM_BP_FAT	GO:0008652~cellular amino acid biosynthetic process	7	1.26812	0.00650954	BCAT1, SEPHS2, ASS1, PHGDH, ASNS, PSAT1, CBS	449	51	13528	4.13538	1	0.178799	10.9252
GOTERM_BP_FAT	GO:0014070~response to organic cyclic substance	11	1.99275	0.00688065	FOS, CCND1, PTGS2, CCND2, HMOX1, ALDH2, OXTR, PTCH1, STAT1, TIMP3, NGF	449	121	13528	2.73902	1	0.186056	11.5128
GOTERM_BP_FAT	GO:0031960~response to corticosteroid stimulus	9	1.63043	0.00705073	KCNMA1, FOS, CCND1, IL6, CCL2, PTGS2, DUSP1, MAP2K1, NGF	449	85	13528	3.19015	1	0.188258	11.7809
GOTERM_BP_FAT	GO:0009064~glutamine family amino acid metabolic process	7	1.26812	0.00715816	ASS1, CTPS, GLS, PHGDH, ASNS, DDAH1, GCLM	449	52	13528	4.05585	1	0.188915	11.9498
GOTERM_BP_FAT	GO:0006412~translation	21	3.80435	0.00717856	EEF1A1, NARS, DARS, AIMP2, EIF5, PABPC4, RPL37, EEF2, EIF1B, EIF3C, RSL1D1, IARS, WARS, EIF3CL, RPL32, RPS29, RPL34, EEF1E1, TRMT6, RPS14, MARS	449	331	13528	1.91152	1	0.187507	11.9819
GOTERM_BP_FAT	GO:0031328~positive regulation of cellular biosynthetic process	36	6.52174	0.00723432	INS-IGF2, GDF6, NAA15, FHL2, TRIM16, PAWR, CALR, SOX9, CITED2, FOS, GATA2, NPAS2, S1PR1, GATA6, HMOX1, TCEA1, PTX3, THBS1, FAM129A, MYC, DDAH1, FGF2, EGR1, IRS2, IL6, EGR2, EPAS1, CEBPG, IGF2, SOD2, HIF1A, YAF2, VEGFA, SIX1, FOXC1, KLF2, BMP6	449	685	13528	1.58343	1	0.186954	12.0694
GOTERM_BP_FAT	GO:0060348~bone development	11	1.99275	0.0076984	PTGS2, TUFT1, INS-IGF2, FHL2, STC1, IGF2, FOXC1, SOX9, IGFBP3, CDH11, BMP6, IGFBP5	449	123	13528	2.69448	1	0.195795	12.7947
GOTERM_BP_FAT	GO:0035150~regulation of tube size	7	1.26812	0.00785224	KCNMA1, ACTC1, KCNJ8, FOXC1, GCLM, SOD2, GCH1	449	53	13528	3.97933	1	0.197387	13.0339
GOTERM_BP_FAT	GO:0050880~regulation of blood vessel size	7	1.26812	0.00785224	KCNMA1, ACTC1, KCNJ8, FOXC1, GCLM, SOD2, GCH1	449	53	13528	3.97933	1	0.197387	13.0339
GOTERM_BP_FAT	GO:0060284~regulation of cell development	15	2.71739	0.00843045	IRX3, INS-IGF2, IGF2, CDH2, CALR, NRCAM, ATF5, BDNF, CCND2, SIX1, ID4, CDK5RAP2, IGFBP3, FGF2, ARHGDIA, NGF	449	205	13528	2.20457	1	0.208346	13.9274
GOTERM_BP_FAT	GO:0009891~positive regulation of biosynthetic process	36	6.52174	0.00890374	INS-IGF2, GDF6, NAA15, FHL2, TRIM16, PAWR, CALR, SOX9, CITED2, FOS, GATA2, NPAS2, S1PR1, GATA6, HMOX1, TCEA1, PTX3, THBS1, FAM129A, MYC, DDAH1, FGF2, EGR1, IRS2, IL6, EGR2, EPAS1, CEBPG, IGF2, SOD2, HIF1A, YAF2, VEGFA, SIX1, FOXC1, KLF2, BMP6	449	695	13528	1.56065	1	0.216675	14.6523
GOTERM_BP_FAT	GO:0006865~amino acid transport	9	1.63043	0.00985167	SLC1A4, SLC1A5, SLC6A9, SLC38A2, SLC22A4, SLC3A2, SLC38A1, SLC7A5, SLC7A11	449	90	13528	3.01292	1	0.234725	16.0869
GOTERM_BP_FAT	GO:0018149~peptide cross-linking	5	0.905797	0.00995135	BGN, TGM2, CSTA, THBS1, FN1	449	26	13528	5.79407	1	0.234675	16.2364
GOTERM_BP_FAT	GO:0048771~tissue remodeling	7	1.26812	0.0102241	BGN, HIF1A, EPAS1, VEGFA, TGM2, SEMA3C, FOXC1	449	56	13528	3.76615	1	0.238161	16.6444
GOTERM_BP_FAT	GO:0043618~regulation of transcription from RNA polymerase II promoter in response to stress	3	0.543478	0.0102393	HIF1A, EPAS1, HMOX1	449	5	13528	18.0775	1	0.236372	16.667
GOTERM_BP_FAT	GO:0043620~regulation of transcription in response to stress	3	0.543478	0.0102393	HIF1A, EPAS1, HMOX1	449	5	13528	18.0775	1	0.236372	16.667
GOTERM_BP_FAT	GO:0009628~response to abiotic stimulus	22	3.98551	0.0110621	KCNMA1, CCL2, FAM175A, RCAN1, OBFC2A, STAT1, TIMP3, SOD2, GLRX2, FOS, CCND1, THBD, DUSP1, STAC, KCNJ8, HSPB8, SLC2A1, HSPB7, PTCH1, THBS1, MYC, NGF	449	368	13528	1.8012	1	0.25065	17.8857
GOTERM_BP_FAT	GO:0051960~regulation of nervous system development	14	2.53623	0.0116099	IRX3, OXTR, CDH2, CALR, NRCAM, ATF5, BDNF, CCND2, SIX1, ID4, CDK5RAP2, FGF2, ARHGDIA, NGF	449	192	13528	2.19692	1	0.259124	18.6877
GOTERM_BP_FAT	GO:0000302~response to reactive oxygen species	8	1.44928	0.0119281	FOS, SLC8A1, DUSP1, HMOX1, SERPINE1, STAT1, SOD2, GLRX2	449	75	13528	3.21378	1	0.263002	19.1502
GOTERM_BP_FAT	GO:0033189~response to vitamin A	6	1.08696	0.0120857	DUSP1, TFRC, GDAP1, TRIM16, PTCH1, MEST	449	42	13528	4.30417	1	0.26378	19.3784
GOTERM_BP_FAT	GO:0048584~positive regulation of response to stimulus	16	2.89855	0.0121984	PVR, IL6, CADM1, IL8, FAM175A, INS-IGF2, CEBPG, IGF2, IL15, CDH13, S1PR1, TAP2, EEF1E1, F3, VEGFA, TGM2, THBS1	449	236	13528	2.04266	1	0.263707	19.5411
GOTERM_BP_FAT	GO:0007507~heart development	15	2.71739	0.0124845	ACTC1, OXTR, SOX9, SOD2, CITED2, GNAQ, ID2, GATA6, KCNJ8, ID1, SEMA3C, PTCH1, FOXC1, ADAMTS1, NRG1	449	215	13528	2.10204	1	0.266824	19.953
